# Supplementary material for: Complete genome sequence and whole-genome phylogeny of Kosmotoga pacifica type strain SLHLJ1T from an East Pacific hydrothermal sediment
Source: Stand Genomic Sci. 2017 Jan 5;12:3. doi: 10.1186/s40793-016-0214-2 (PMC5217533; doi:10.1186/s40793-016-0214-2)
Supplement: Additional file 1: Table S1. — List of the core genes chosen for the whole genome phylogenetic analysis. This list is composed of 499 orthologous genes from 20 genomes within the phylum Thermotogae. (XLS 210 kb) [file 40793_2016_214_MOESM1_ESM.xls]

	Defluviitoga_tunisiensis_DTL3	Fervidobacterium_nodosum_Rt17-B1	Fervidobacterium_pennivorans_DSM_9078	Kosmotoga_olearia_TBF_19.5.1	Marinitoga_piezophila_KA3	Mesotoga_prima_MesG1.Ag.4.2	Petrotoga_mobilis_SJ95	Kosmotoga pacifica SLHLJ1	Thermosipho_africanus_TCF52B	Thermosipho_melanesiensis_BI429	Thermotoga_elfii_NBRC	Thermotoga_hypogea_NBRC	Thermotoga_lettingae_TMO	Thermotoga_maritima_MSB8	Thermotoga_naphthophila_RKU-10	Thermotoga_neapolitana_DSM_4359	Thermotoga_petrophila_RKU-1	Thermotoga_profunda_AZM34c06_DNA	Thermotoga_sp._RQ2	Thermotoga_thermarum_DSM_5069
ORTHOMCL110(20 genes,20 taxa):	NZ_LN824141.1_prot_WP_045086981.1_1;	ABS59874.1;	AFG34164.1;	ACR78730.1;	AEX84461.1;	AFK05758.1;	ABX30750.1;	IX53_00005;	ACJ74729.1;	ABR29883.1;	NC_022792.1_prot_WP_012002055.1_1;	NC_022795.1_prot_WP_031504689.1_1;	ABV32574.1;	NC_021214.1_prot_WP_004080636.1_917;	ADA66110.1;	ACM23825.1;	ABQ46030.1;	NZ_AP014510.1_prot_WP_041081029.1_1;	NC_010483.1_prot_WP_012310261.1_1;	AEH50109.1;
ORTHOMCL111(20 genes,20 taxa):	NZ_LN824141.1_prot_WP_045088269.1_1540;	ABS60863.1;	AFG35363.1;	ACR78732.1;	AEX85695.1;	AFK06274.1;	ABX32089.1;	IX53_00015;	ACJ74585.1;	ABR31626.1;	NC_022792.1_prot_WP_012002057.1_3;	NC_022795.1_prot_WP_031504692.1_3;	ABV32576.1;	NC_021214.1_prot_WP_004080637.1_916;	ADA66111.1;	ACM23826.1;	ABQ46031.1;	NZ_AP014510.1_prot_WP_041083757.1_1958;	NC_010483.1_prot_WP_012310262.1_2;	AEH50111.1;
ORTHOMCL112(20 genes,20 taxa):	NZ_LN824141.1_prot_WP_045088283.1_1562;	ABS60861.1;	AFG35365.1;	ACR80102.1;	AEX85065.1;	AFK07189.1;	ABX32068.1;	IX53_04475;	ACJ74583.1;	ABR31628.1;	NC_022792.1_prot_WP_012002059.1_5;	NC_022795.1_prot_WP_031504697.1_6;	ABV32578.1;	NC_021214.1_prot_WP_015646132.1_913;	ADA66114.1;	ACM23829.1;	ABQ46034.1;	NZ_AP014510.1_prot_WP_041083761.1_1960;	NC_010483.1_prot_WP_041434389.1_5;	AEH50113.1;
ORTHOMCL113(20 genes,20 taxa):	NZ_LN824141.1_prot_WP_045087975.1_1186;	ABS61182.1;	AFG35810.1;	ACR79567.1;	AEX86310.1;	AFK07540.1;	ABX32370.1;	IX53_09080;	ACJ74709.1;	ABR31742.1;	NC_022792.1_prot_WP_028843263.1_878;	NC_022795.1_prot_WP_031505271.1_1518;	ABV33463.1;	NC_021214.1_prot_WP_004080647.1_906;	ADA66120.1;	ACM23836.1;	ABQ46041.1;	NZ_AP014510.1_prot_WP_041083694.1_1910;	NC_010483.1_prot_WP_011942719.1_12;	AEH51769.1;
ORTHOMCL114(20 genes,20 taxa):	NZ_LN824141.1_prot_WP_045087397.1_503;	ABS60865.1;	AFG35361.1;	ACR79568.1;	AEX86311.1;	AFK07541.1;	ABX31781.1;	IX53_09085;	ACJ76196.1;	ABR31363.1;	NC_022792.1_prot_WP_012002120.1_67;	NC_022795.1_prot_WP_038059552.1_2008;	ABV32639.1;	NC_021214.1_prot_WP_004080649.1_904;	ADA66122.1;	ACM23838.1;	ABQ46043.1;	NZ_AP014510.1_prot_WP_041082151.1_834;	NC_010483.1_prot_WP_011942721.1_14;	AEH50860.1;
ORTHOMCL115(20 genes,20 taxa):	NZ_LN824141.1_prot_WP_045087974.1_1185;	ABS61364.1;	AFG34211.1;	ACR79569.1;	AEX86312.1;	AFK07542.1;	ABX32369.1;	IX53_09090;	ACJ74981.1;	ABR30129.1;	NC_022792.1_prot_WP_012002119.1_66;	NC_022795.1_prot_WP_031502479.1_2009;	ABV32638.1;	NC_021214.1_prot_WP_004080650.1_903;	ADA66123.1;	ACM23839.1;	ABQ46044.1;	NZ_AP014510.1_prot_WP_041082152.1_835;	NC_010483.1_prot_WP_011942722.1_15;	AEH50859.1;
ORTHOMCL116(20 genes,20 taxa):	NZ_LN824141.1_prot_WP_045087086.1_132;	ABS61362.1;	AFG34213.1;	ACR80146.1;	AEX86000.1;	AFK06010.1;	ABX31534.1;	IX53_04055;	ACJ74979.1;	ABR30128.1;	NC_022792.1_prot_WP_012002118.1_65;	NC_022795.1_prot_WP_031502477.1_2010;	ABV32637.1;	NC_021214.1_prot_WP_004080652.1_902;	ADA66124.1;	ACM23840.1;	ABQ46045.1;	NZ_AP014510.1_prot_WP_041082154.1_836;	NC_010483.1_prot_WP_011942723.1_16;	AEH50858.1;
ORTHOMCL117(20 genes,20 taxa):	NZ_LN824141.1_prot_WP_045087709.1_866;	ABS60304.1;	AFG34653.1;	ACR80425.1;	AEX86087.1;	AFK06206.1;	ABX30786.1;	IX53_02515;	ACJ75765.1;	ABR30901.1;	NC_022792.1_prot_WP_012003432.1_1387;	NC_022795.1_prot_WP_031504815.1_88;	ABV33956.1;	NC_021214.1_prot_WP_004080683.1_888;	ADA66138.1;	ACM23854.1;	ABQ46059.1;	NZ_AP014510.1_prot_WP_041082839.1_1279;	NC_010483.1_prot_WP_004080683.1_30;	AEH51960.1;
ORTHOMCL118(20 genes,20 taxa):	NZ_LN824141.1_prot_WP_045087537.1_664;	ABS60170.1;	AFG34601.1;	ACR80602.1;	AEX85873.1;	AFK06376.1;	ABX31825.1;	IX53_08645;	ACJ74793.1;	ABR29953.1;	NC_022792.1_prot_WP_012003431.1_1386;	NC_022795.1_prot_WP_031504816.1_89;	ABV33955.1;	NC_021214.1_prot_WP_004080684.1_887;	ADA66139.1;	ACM23855.1;	ABQ46060.1;	NZ_AP014510.1_prot_WP_041082838.1_1278;	NC_010483.1_prot_WP_011942737.1_31;	AEH51959.1;
ORTHOMCL119(20 genes,20 taxa):	NZ_LN824141.1_prot_WP_045087536.1_663;	ABS60171.1;	AFG34602.1;	ACR80603.1;	AEX85874.1;	AFK06375.1;	ABX31824.1;	IX53_08640;	ACJ74794.1;	ABR29954.1;	NC_022792.1_prot_WP_012003430.1_1385;	NC_022795.1_prot_WP_031504818.1_90;	ABV33954.1;	NC_021214.1_prot_WP_004080686.1_886;	ADA66140.1;	ACM23857.1;	ABQ46061.1;	NZ_AP014510.1_prot_WP_041082835.1_1277;	NC_010483.1_prot_WP_011942738.1_32;	AEH51958.1;
ORTHOMCL120(20 genes,20 taxa):	NZ_LN824141.1_prot_WP_045088054.1_1280;	ABS60167.1;	AFG34598.1;	ACR80605.1;	AEX86212.1;	AFK06373.1;	ABX31914.1;	IX53_08630;	ACJ74935.1;	ABR30084.1;	NC_022792.1_prot_WP_028843546.1_141;	NC_022795.1_prot_WP_031505164.1_308;	ABV32723.1;	NC_021214.1_prot_WP_004080690.1_884;	ADA66142.1;	ACM23859.1;	ABQ46063.1;	NZ_AP014510.1_prot_WP_041081099.1_83;	NC_010483.1_prot_WP_012310275.1_34;	AEH50370.1;
ORTHOMCL121(20 genes,20 taxa):	NZ_LN824141.1_prot_WP_045087535.1_662;	ABS61308.1;	AFG35570.1;	ACR80606.1;	AEX85876.1;	AFK06372.1;	ABX31823.1;	IX53_08625;	ACJ76082.1;	ABR31153.1;	NC_022792.1_prot_WP_012002203.1_140;	NC_022795.1_prot_WP_031505163.1_309;	ABV32722.1;	NC_021214.1_prot_WP_004080692.1_883;	ADA66143.1;	ACM23860.1;	ABQ46064.1;	NZ_AP014510.1_prot_WP_041081100.1_84;	NC_010483.1_prot_WP_012310276.1_35;	AEH50369.1;
ORTHOMCL122(20 genes,20 taxa):	NZ_LN824141.1_prot_WP_045088111.1_1350;	ABS61012.1;	AFG35534.1;	ACR80435.1;	AEX85826.1;	AFK06286.1;	ABX32461.1;	IX53_02350;	ACJ75954.1;	ABR31215.1;	NC_022792.1_prot_WP_012002817.1_750;	NC_022795.1_prot_WP_031502758.1_1850;	ABV33336.1;	NC_021214.1_prot_WP_004080708.1_875;	ADA66151.1;	ACM23868.1;	ABQ46072.1;	NZ_AP014510.1_prot_WP_041084252.1_1461;	NC_010483.1_prot_WP_012310280.1_43;	AEH50698.1;
ORTHOMCL123(20 genes,20 taxa):	NZ_LN824141.1_prot_WP_045088110.1_1349;	ABS61013.1;	AFG35533.1;	ACR80434.1;	AEX85827.1;	AFK06287.1;	ABX32462.1;	IX53_02355;	ACJ75953.1;	ABR31214.1;	NC_022792.1_prot_WP_028843319.1_751;	NC_022795.1_prot_WP_031502756.1_1851;	ABV33337.1;	NC_021214.1_prot_WP_004080709.1_874;	ADA66152.1;	ACM23869.1;	ABQ46073.1;	NZ_AP014510.1_prot_WP_041083119.1_1462;	NC_010483.1_prot_WP_012310281.1_44;	AEH50699.1;
ORTHOMCL124(20 genes,20 taxa):	NZ_LN824141.1_prot_WP_045088128.1_1367;	ABS61561.1;	AFG35974.1;	ACR80391.1;	AEX86231.1;	AFK05938.1;	ABX32415.1;	IX53_02225;	ACJ74898.1;	ABR30051.1;	NC_022792.1_prot_WP_028843309.1_797;	NC_022795.1_prot_WP_031502875.1_1788;	ABV33383.1;	NC_021214.1_prot_WP_004080719.1_868;	ADA66158.1;	ACM23874.1;	ABQ46079.1;	NZ_AP014510.1_prot_WP_041083189.1_1508;	NC_010483.1_prot_WP_008193093.1_50;	AEH50744.1;
ORTHOMCL125(20 genes,20 taxa):	NZ_LN824141.1_prot_WP_045088567.1_516;	ABS60518.1;	AFG34391.1;	ACR79554.1;	AEX85771.1;	AFK08016.1;	ABX31747.1;	IX53_03690;	ACJ74791.1;	ABR29951.1;	NC_022792.1_prot_WP_028843308.1_798;	NC_022795.1_prot_WP_031502878.1_1787;	ABV33384.1;	NC_021214.1_prot_WP_004080721.1_867;	ADA66159.1;	ACM23875.1;	ABQ46080.1;	NZ_AP014510.1_prot_WP_041083191.1_1509;	NC_010483.1_prot_WP_012310286.1_51;	AEH50745.1;
ORTHOMCL126(20 genes,20 taxa):	NZ_LN824141.1_prot_WP_045088543.1_365;	ABS61098.1;	AFG35558.1;	ACR80081.1;	AEX85195.1;	AFK07163.1;	ABX31082.1;	IX53_03785;	ACJ75719.1;	ABR30861.1;	NC_022792.1_prot_WP_012003516.1_1472;	NC_022795.1_prot_WP_031503720.1_1257;	ABV34040.1;	NC_021214.1_prot_WP_004080725.1_865;	ADA66161.1;	ACM23877.1;	ABQ46082.1;	NZ_AP014510.1_prot_WP_041082591.1_1129;	NC_010483.1_prot_WP_012310288.1_53;	AEH51116.1;
ORTHOMCL127(20 genes,20 taxa):	NZ_LN824141.1_prot_WP_045088602.1_792;	ABS61620.1;	AFG36107.1;	ACR80592.1;	AEX86381.1;	AFK06385.1;	ABX31588.1;	IX53_08695;	ACJ74532.1;	ABR31566.1;	NC_022792.1_prot_WP_038051567.1_1425;	NC_022795.1_prot_WP_031502338.1_751;	ABV33992.1;	NC_021214.1_prot_WP_004080729.1_863;	ADA66163.1;	ACM23879.1;	ABQ46084.1;	NZ_AP014510.1_prot_WP_041084089.1_859;	NC_010483.1_prot_WP_012310290.1_55;	AEH50219.1;
ORTHOMCL128(20 genes,20 taxa):	NZ_LN824141.1_prot_WP_045088603.1_794;	ABS61618.1;	AFG36105.1;	ACR80590.1;	AEX86383.1;	AFK06387.1;	ABX31590.1;	IX53_08705;	ACJ74530.1;	ABR31565.1;	NC_022792.1_prot_WP_038051569.1_1423;	NC_022795.1_prot_WP_031502336.1_749;	ABV33990.1;	NC_021214.1_prot_WP_004080731.1_861;	ADA66165.1;	ACM23881.1;	ABQ46086.1;	NZ_AP014510.1_prot_WP_041082192.1_861;	NC_010483.1_prot_WP_012310292.1_57;	AEH50221.1;
ORTHOMCL129(20 genes,20 taxa):	NZ_LN824141.1_prot_WP_045087474.1_591;	ABS60708.1;	AFG35278.1;	ACR79031.1;	AEX86075.1;	AFK06665.1;	ABX31301.1;	IX53_09990;	ACJ75830.1;	ABR30420.1;	NC_022792.1_prot_WP_038051530.1_1608;	NC_022795.1_prot_WP_031502883.1_1784;	ABV34159.1;	NC_021214.1_prot_WP_004080734.1_860;	ADA66166.1;	ACM23882.1;	ABQ46087.1;	NZ_AP014510.1_prot_WP_041082214.1_876;	NC_010483.1_prot_WP_012310293.1_58;	AEH51271.1;
ORTHOMCL130(20 genes,20 taxa):	NZ_LN824141.1_prot_WP_045087473.1_590;	ABS60709.1;	AFG35279.1;	ACR79032.1;	AEX86076.1;	AFK06664.1;	ABX31300.1;	IX53_09985;	ACJ75831.1;	ABR30421.1;	NC_022792.1_prot_WP_028843796.1_1607;	NC_022795.1_prot_WP_031502885.1_1783;	ABV34158.1;	NC_021214.1_prot_WP_004080736.1_859;	ADA66167.1;	ACM23883.1;	ABQ46088.1;	NZ_AP014510.1_prot_WP_041082215.1_877;	NC_010483.1_prot_WP_011942762.1_59;	AEH51272.1;
ORTHOMCL131(20 genes,20 taxa):	NZ_LN824141.1_prot_WP_045087471.1_588;	ABS60584.1;	AFG35053.1;	ACR79034.1;	AEX84881.1;	AFK06662.1;	ABX31298.1;	IX53_09975;	ACJ76109.1;	ABR31179.1;	NC_022792.1_prot_WP_012003632.1_1605;	NC_022795.1_prot_WP_031502889.1_1781;	ABV34156.1;	NC_021214.1_prot_WP_004080738.1_857;	ADA66169.1;	ACM23885.1;	ABQ46090.1;	NZ_AP014510.1_prot_WP_041082217.1_879;	NC_010483.1_prot_WP_012310295.1_61;	AEH51274.1;
ORTHOMCL132(20 genes,20 taxa):	NZ_LN824141.1_prot_WP_045087470.1_587;	ABS60583.1;	AFG35054.1;	ACR79035.1;	AEX84882.1;	AFK06661.1;	ABX31297.1;	IX53_09970;	ACJ76108.1;	ABR31178.1;	NC_022792.1_prot_WP_012003631.1_1604;	NC_022795.1_prot_WP_031502890.1_1780;	ABV34155.1;	NC_021214.1_prot_WP_004080739.1_856;	ADA66170.1;	ACM23886.1;	ABQ46091.1;	NZ_AP014510.1_prot_WP_041082218.1_880;	NC_010483.1_prot_WP_004080739.1_62;	AEH51275.1;
ORTHOMCL133(20 genes,20 taxa):	NZ_LN824141.1_prot_WP_045087469.1_586;	ABS60745.1;	AFG35504.1;	ACR79036.1;	AEX84883.1;	AFK06660.1;	ABX31296.1;	IX53_09965;	ACJ76175.1;	ABR31270.1;	NC_022792.1_prot_WP_028843798.1_1603;	NC_022795.1_prot_WP_031502891.1_1779;	ABV34154.1;	NC_021214.1_prot_WP_004080741.1_855;	ADA66171.1;	ACM23887.1;	ABQ46092.1;	NZ_AP014510.1_prot_WP_041084091.1_881;	NC_010483.1_prot_WP_012310296.1_63;	AEH51276.1;
ORTHOMCL134(20 genes,20 taxa):	NZ_LN824141.1_prot_WP_045087468.1_585;	ABS60746.1;	AFG35505.1;	ACR79037.1;	AEX84884.1;	AFK06659.1;	ABX31295.1;	IX53_09960;	ACJ76174.1;	ABR31269.1;	NC_022792.1_prot_WP_028843799.1_1602;	NC_022795.1_prot_WP_031502893.1_1778;	ABV34153.1;	NC_021214.1_prot_WP_004080743.1_854;	ADA66172.1;	ACM23888.1;	ABQ46093.1;	NZ_AP014510.1_prot_WP_041082220.1_882;	NC_010483.1_prot_WP_012310297.1_64;	AEH51277.1;
ORTHOMCL135(20 genes,20 taxa):	NZ_LN824141.1_prot_WP_045087667.1_817;	ABS61188.1;	AFG35816.1;	ACR80302.1;	AEX86189.1;	AFK07838.1;	ABX31834.1;	IX53_03100;	ACJ74703.1;	ABR31736.1;	NC_022792.1_prot_WP_028843481.1_291;	NC_022795.1_prot_WP_031503812.1_1205;	ABV32875.1;	NC_021214.1_prot_WP_004080745.1_852;	ADA66174.1;	ACM23890.1;	ABQ46095.1;	NZ_AP014510.1_prot_WP_041083560.1_1755;	NC_010483.1_prot_WP_012310299.1_66;	AEH50524.1;
ORTHOMCL136(20 genes,20 taxa):	NZ_LN824141.1_prot_WP_045087668.1_818;	ABS61187.1;	AFG35815.1;	ACR80301.1;	AEX86190.1;	AFK07837.1;	ABX31835.1;	IX53_03105;	ACJ74704.1;	ABR31737.1;	NC_022792.1_prot_WP_012002357.1_292;	NC_022795.1_prot_WP_031503814.1_1204;	ABV32876.1;	NC_021214.1_prot_WP_004080746.1_851;	ADA66175.1;	ACM23891.1;	ABQ46096.1;	NZ_AP014510.1_prot_WP_041083559.1_1754;	NC_010483.1_prot_WP_004080746.1_67;	AEH50523.1;
ORTHOMCL137(20 genes,20 taxa):	NZ_LN824141.1_prot_WP_045087669.1_819;	ABS61186.1;	AFG35814.1;	ACR80300.1;	AEX86191.1;	AFK07836.1;	ABX31836.1;	IX53_03110;	ACJ74705.1;	ABR31738.1;	NC_022792.1_prot_WP_038051347.1_293;	NC_022795.1_prot_WP_031503816.1_1203;	ABV32877.1;	NC_021214.1_prot_WP_004080747.1_850;	ADA66176.1;	ACM23892.1;	ABQ46097.1;	NZ_AP014510.1_prot_WP_041084345.1_1753;	NC_010483.1_prot_WP_004080747.1_68;	AEH50522.1;
ORTHOMCL138(20 genes,20 taxa):	NZ_LN824141.1_prot_WP_045087985.1_1200;	ABS60263.1;	AFG34348.1;	ACR80778.1;	AEX85974.1;	AFK06569.1;	ABX32386.1;	IX53_00510;	ACJ75075.1;	ABR30304.1;	NC_022792.1_prot_WP_028843903.1_1368;	NC_022795.1_prot_WP_038059709.1_1335;	ABV33937.1;	NC_021214.1_prot_WP_004080749.1_848;	ADA66178.1;	ACM23894.1;	ABQ46099.1;	NZ_AP014510.1_prot_WP_041084063.1_633;	NC_010483.1_prot_WP_012310300.1_70;	AEH51051.1;
ORTHOMCL139(20 genes,20 taxa):	NZ_LN824141.1_prot_WP_045087984.1_1199;	ABS60880.1;	AFG35344.1;	ACR80779.1;	AEX85724.1;	AFK06570.1;	ABX32385.1;	IX53_00505;	ACJ75773.1;	ABR30907.1;	NC_022792.1_prot_WP_028843904.1_1367;	NC_022795.1_prot_WP_031503586.1_1336;	ABV33936.1;	NC_021214.1_prot_WP_004080766.1_847;	ADA66179.1;	ACM23895.1;	ABQ46100.1;	NZ_AP014510.1_prot_WP_041081826.1_634;	NC_010483.1_prot_WP_012310301.1_71;	AEH51050.1;
ORTHOMCL140(20 genes,20 taxa):	NZ_LN824141.1_prot_WP_045087983.1_1198;	ABS60267.1;	AFG34352.1;	ACR80780.1;	AEX85725.1;	AFK06571.1;	ABX32384.1;	IX53_00500;	ACJ76214.1;	ABR31343.1;	NC_022792.1_prot_WP_012003411.1_1366;	NC_022795.1_prot_WP_031503584.1_1337;	ABV33935.1;	NC_021214.1_prot_WP_004080768.1_846;	ADA66180.1;	ACM23896.1;	ABQ46101.1;	NZ_AP014510.1_prot_WP_041081828.1_635;	NC_010483.1_prot_WP_012310302.1_72;	AEH51049.1;
ORTHOMCL141(20 genes,20 taxa):	NZ_LN824141.1_prot_WP_045088109.1_1348;	ABS60565.1;	AFG35071.1;	ACR79653.1;	AEX85828.1;	AFK07247.1;	ABX32463.1;	IX53_09175;	ACJ74956.1;	ABR30105.1;	NC_022792.1_prot_WP_028843900.1_1371;	NC_022795.1_prot_WP_031503463.1_1399;	ABV33940.1;	NC_021214.1_prot_WP_004080774.1_843;	ADA66183.1;	ACM23899.1;	ABQ46104.1;	NZ_AP014510.1_prot_WP_041082970.1_1357;	NC_010483.1_prot_WP_012310305.1_75;	AEH51615.1;
ORTHOMCL142(20 genes,20 taxa):	NZ_LN824141.1_prot_WP_045088482.1_12;	ABS61090.1;	AFG35926.1;	ACR80078.1;	AEX85612.1;	AFK07166.1;	ABX32513.1;	IX53_03800;	ACJ74805.1;	ABR29965.1;	NC_022792.1_prot_WP_012003811.1_1785;	NC_022795.1_prot_WP_031503959.1_1126;	ABV34335.1;	NC_021214.1_prot_WP_004080776.1_841;	ADA66185.1;	ACM23901.1;	ABQ46106.1;	NZ_AP014510.1_prot_WP_041082263.1_907;	NC_010483.1_prot_WP_012310307.1_77;	AEH51854.1;
ORTHOMCL143(20 genes,20 taxa):	NZ_LN824141.1_prot_WP_045086989.1_11;	ABS61091.1;	AFG35925.1;	ACR80079.1;	AEX85611.1;	AFK07165.1;	ABX32514.1;	IX53_03795;	ACJ74804.1;	ABR29964.1;	NC_022792.1_prot_WP_028843717.1_1784;	NC_022795.1_prot_WP_031503957.1_1127;	ABV34334.1;	NC_021214.1_prot_WP_004080777.1_840;	ADA66186.1;	ACM23902.1;	ABQ46107.1;	NZ_AP014510.1_prot_WP_041082264.1_908;	NC_010483.1_prot_WP_012310308.1_78;	AEH51853.1;
ORTHOMCL144(20 genes,20 taxa):	NZ_LN824141.1_prot_WP_045087613.1_752;	ABS61045.1;	AFG35663.1;	ACR78963.1;	AEX84802.1;	AFK06495.1;	ABX31565.1;	IX53_09585;	ACJ75414.1;	ABR30659.1;	NC_022792.1_prot_WP_028843802.1_1599;	NC_022795.1_prot_WP_031502897.1_1775;	ABV34150.1;	NC_021214.1_prot_WP_004080778.1_839;	ADA66187.1;	ACM23903.1;	ABQ46108.1;	NZ_AP014510.1_prot_WP_041082227.1_886;	NC_010483.1_prot_WP_012310309.1_79;	AEH51280.1;
ORTHOMCL145(20 genes,20 taxa):	NZ_LN824141.1_prot_WP_045087329.1_424;	ABS60526.1;	AFG34383.1;	ACR80784.1;	AEX85786.1;	AFK06588.1;	ABX31038.1;	IX53_01540;	ACJ75389.1;	ABR30669.1;	NC_022792.1_prot_WP_038051589.1_1285;	NC_022795.1_prot_WP_031502564.1_1960;	ABV33845.1;	NC_021214.1_prot_WP_008193047.1_838;	ADA66188.1;	ACM23904.1;	ABQ46109.1;	NZ_AP014510.1_prot_WP_041082394.1_1002;	NC_010483.1_prot_WP_038033997.1_80;	AEH51059.1;
ORTHOMCL146(20 genes,20 taxa):	NZ_LN824141.1_prot_WP_045086986.1_8;	ABS60851.1;	AFG35230.1;	ACR80402.1;	AEX85608.1;	AFK06085.1;	ABX32517.1;	IX53_04645;	ACJ76206.1;	ABR31353.1;	NC_022792.1_prot_WP_038051590.1_1284;	NC_022795.1_prot_WP_031502565.1_1959;	ABV33844.1;	NC_021214.1_prot_WP_004080780.1_837;	ADA66189.1;	ACM23905.1;	ABQ46110.1;	NZ_AP014510.1_prot_WP_041084108.1_1003;	NC_010483.1_prot_WP_012310311.1_81;	AEH51060.1;
ORTHOMCL147(20 genes,20 taxa):	NZ_LN824141.1_prot_WP_045086987.1_9;	ABS60852.1;	AFG35231.1;	ACR80403.1;	AEX85609.1;	AFK06084.1;	ABX32516.1;	IX53_04640;	ACJ76207.1;	ABR31352.1;	NC_022792.1_prot_WP_012003319.1_1283;	NC_022795.1_prot_WP_031502566.1_1958;	ABV33843.1;	NC_021214.1_prot_WP_004080781.1_836;	ADA66190.1;	ACM23906.1;	ABQ46111.1;	NZ_AP014510.1_prot_WP_041082396.1_1004;	NC_010483.1_prot_WP_012310312.1_82;	AEH51061.1;
ORTHOMCL148(20 genes,20 taxa):	NZ_LN824141.1_prot_WP_045088282.1_1560;	ABS61489.1;	AFG36030.1;	ACR80404.1;	AEX85485.1;	AFK06083.1;	ABX32070.1;	IX53_04635;	ACJ74909.1;	ABR30062.1;	NC_022792.1_prot_WP_012003318.1_1282;	NC_022795.1_prot_WP_031502568.1_1957;	ABV33842.1;	NC_021214.1_prot_WP_004080783.1_835;	ADA66191.1;	ACM23907.1;	ABQ46112.1;	NZ_AP014510.1_prot_WP_041082398.1_1005;	NC_010483.1_prot_WP_011942786.1_83;	AEH51062.1;
ORTHOMCL149(20 genes,20 taxa):	NZ_LN824141.1_prot_WP_045088722.1_1558;	ABS60855.1;	AFG35371.1;	ACR80407.1;	AEX85486.1;	AFK06080.1;	ABX32072.1;	IX53_04620;	ACJ75120.1;	ABR30499.1;	NC_022792.1_prot_WP_012002466.1_403;	NC_022795.1_prot_WP_038059797.1_441;	ABV32985.1;	NC_021214.1_prot_WP_015646126.1_830;	ADA66196.1;	ACM23913.1;	ABQ46117.1;	NZ_AP014510.1_prot_WP_041084395.1_1860;	NC_010483.1_prot_WP_012310316.1_88;	AEH50895.1;
ORTHOMCL150(20 genes,20 taxa):	NZ_LN824141.1_prot_WP_045088422.1_1725;	ABS60005.1;	AFG34517.1;	ACR79080.1;	AEX84721.1;	AFK06938.1;	ABX30920.1;	IX53_10185;	ACJ76055.1;	ABR31125.1;	NC_022792.1_prot_WP_012003098.1_1031;	NC_022795.1_prot_WP_031503545.1_1360;	ABV33617.1;	NC_021214.1_prot_WP_004080797.1_828;	ADA66198.1;	ACM23915.1;	ABQ46119.1;	NZ_AP014510.1_prot_WP_041082435.1_1028;	NC_010483.1_prot_WP_012310318.1_90;	AEH51302.1;
ORTHOMCL151(20 genes,20 taxa):	NZ_LN824141.1_prot_WP_045088421.1_1724;	ABS60006.1;	AFG34518.1;	ACR79079.1;	AEX84720.1;	AFK06937.1;	ABX30921.1;	IX53_10180;	ACJ76054.1;	ABR31124.1;	NC_022792.1_prot_WP_012003099.1_1032;	NC_022795.1_prot_WP_031503543.1_1361;	ABV33618.1;	NC_021214.1_prot_WP_004080800.1_827;	ADA66199.1;	ACM23916.1;	ABQ46120.1;	NZ_AP014510.1_prot_WP_041082436.1_1029;	NC_010483.1_prot_WP_004080800.1_91;	AEH51303.1;
ORTHOMCL152(20 genes,20 taxa):	NZ_LN824141.1_prot_WP_045088420.1_1723;	ABS60007.1;	AFG34519.1;	ACR79078.1;	AEX84719.1;	AFK06936.1;	ABX30922.1;	IX53_10175;	ACJ76053.1;	ABR31123.1;	NC_022792.1_prot_WP_012003100.1_1033;	NC_022795.1_prot_WP_031503542.1_1362;	ABV33619.1;	NC_021214.1_prot_WP_004080802.1_826;	ADA66200.1;	ACM23917.1;	ABQ46121.1;	NZ_AP014510.1_prot_WP_041082438.1_1030;	NC_010483.1_prot_WP_004080802.1_92;	AEH51304.1;
ORTHOMCL153(20 genes,20 taxa):	NZ_LN824141.1_prot_WP_045088418.1_1721;	ABS60816.1;	AFG35180.1;	ACR79076.1;	AEX84717.1;	AFK06934.1;	ABX30924.1;	IX53_10165;	ACJ75370.1;	ABR30535.1;	NC_022792.1_prot_WP_012003102.1_1035;	NC_022795.1_prot_WP_031503539.1_1364;	ABV33621.1;	NC_021214.1_prot_WP_004080806.1_824;	ADA66202.1;	ACM23919.1;	ABQ46123.1;	NZ_AP014510.1_prot_WP_041082440.1_1032;	NC_010483.1_prot_WP_012310319.1_94;	AEH51306.1;
ORTHOMCL154(20 genes,20 taxa):	NZ_LN824141.1_prot_WP_045088416.1_1719;	ABS60818.1;	AFG35182.1;	ACR79074.1;	AEX84715.1;	AFK06932.1;	ABX30926.1;	IX53_10155;	ACJ75372.1;	ABR30537.1;	NC_022792.1_prot_WP_038051149.1_1037;	NC_022795.1_prot_WP_038059707.1_1366;	ABV33623.1;	NC_021214.1_prot_WP_004080810.1_822;	ADA66204.1;	ACM23921.1;	ABQ46125.1;	NZ_AP014510.1_prot_WP_041082443.1_1034;	NC_010483.1_prot_WP_012310321.1_96;	AEH51308.1;
ORTHOMCL155(20 genes,20 taxa):	NZ_LN824141.1_prot_WP_045088415.1_1718;	ABS60819.1;	AFG35183.1;	ACR79073.1;	AEX84714.1;	AFK06931.1;	ABX30927.1;	IX53_10150;	ACJ75373.1;	ABR30538.1;	NC_022792.1_prot_WP_012003105.1_1038;	NC_022795.1_prot_WP_031503533.1_1367;	ABV33624.1;	NC_021214.1_prot_WP_004080813.1_821;	ADA66205.1;	ACM23922.1;	ABQ46126.1;	NZ_AP014510.1_prot_WP_041082445.1_1035;	NC_010483.1_prot_WP_012310322.1_97;	AEH51309.1;
ORTHOMCL156(20 genes,20 taxa):	NZ_LN824141.1_prot_WP_045087695.1_849;	ABS60822.1;	AFG35186.1;	ACR79070.1;	AEX85144.1;	AFK06928.1;	ABX32550.1;	IX53_10135;	ACJ75376.1;	ABR30541.1;	NC_022792.1_prot_WP_012003108.1_1041;	NC_022795.1_prot_WP_031503527.1_1370;	ABV33627.1;	NC_021214.1_prot_WP_004080826.1_818;	ADA66208.1;	ACM23925.1;	ABQ46129.1;	NZ_AP014510.1_prot_WP_041084113.1_1038;	NC_010483.1_prot_WP_012310323.1_100;	AEH51312.1;
ORTHOMCL157(20 genes,20 taxa):	NZ_LN824141.1_prot_WP_045088414.1_1717;	ABS60032.1;	AFG34554.1;	ACR79018.1;	AEX86109.1;	AFK06906.1;	ABX30930.1;	IX53_10055;	ACJ75989.1;	ABR31018.1;	NC_022792.1_prot_WP_012002577.1_512;	NC_022795.1_prot_WP_031502942.1_1750;	ABV33096.1;	NC_021214.1_prot_WP_004080829.1_815;	ADA66211.1;	ACM23928.1;	ABQ46132.1;	NZ_AP014510.1_prot_WP_041083567.1_1767;	NC_010483.1_prot_WP_012310324.1_102;	AEH50473.1;
ORTHOMCL158(20 genes,20 taxa):	NZ_LN824141.1_prot_WP_045087190.1_257;	ABS60782.1;	AFG35388.1;	ACR80822.1;	AEX86177.1;	AFK06950.1;	ABX30956.1;	IX53_10240;	ACJ75390.1;	ABR30670.1;	NC_022792.1_prot_WP_028843582.1_56;	NC_022795.1_prot_WP_031502461.1_2019;	ABV32628.1;	NC_021214.1_prot_WP_004080832.1_813;	ADA66213.1;	ACM23930.1;	ABQ46134.1;	NZ_AP014510.1_prot_WP_041082169.1_845;	NC_010483.1_prot_WP_012310326.1_104;	AEH50849.1;
ORTHOMCL159(20 genes,20 taxa):	NZ_LN824141.1_prot_WP_045088526.1_255;	ABS60879.1;	AFG35345.1;	ACR80823.1;	AEX86178.1;	AFK06951.1;	ABX30957.1;	IX53_10245;	ACJ75772.1;	ABR30906.1;	NC_022792.1_prot_WP_028843581.1_57;	NC_022795.1_prot_WP_031502463.1_2018;	ABV32629.1;	NC_021214.1_prot_WP_004080838.1_812;	ADA66214.1;	ACM23931.1;	ABQ46135.1;	NZ_AP014510.1_prot_WP_041082167.1_844;	NC_010483.1_prot_WP_004080838.1_105;	AEH50850.1;
ORTHOMCL161(20 genes,20 taxa):	NZ_LN824141.1_prot_WP_045088687.1_1377;	ABS61610.1;	AFG36097.1;	ACR80723.1;	AEX85924.1;	AFK05788.1;	ABX32402.1;	IX53_02480;	ACJ76113.1;	ABR31183.1;	NC_022792.1_prot_WP_012002777.1_710;	NC_022795.1_prot_WP_031502655.1_1905;	ABV33296.1;	NC_021214.1_prot_WP_004080843.1_809;	ADA66217.1;	ACM23934.1;	ABQ46138.1;	NZ_AP014510.1_prot_WP_041082020.1_751;	NC_010483.1_prot_WP_012310327.1_108;	AEH50752.1;
ORTHOMCL162(20 genes,20 taxa):	NZ_LN824141.1_prot_WP_045087868.1_1050;	ABS61288.1;	AFG35858.1;	ACR79823.1;	AEX85540.1;	AFK07637.1;	ABX31138.1;	IX53_07735;	ACJ76023.1;	ABR31050.1;	NC_022792.1_prot_WP_012003024.1_956;	NC_022795.1_prot_WP_031502370.1_768;	ABV33543.1;	NC_021214.1_prot_WP_004080855.1_798;	ADA66227.1;	ACM23947.1;	ABQ46150.1;	NZ_AP014510.1_prot_WP_041081683.1_530;	NC_010483.1_prot_WP_012310336.1_119;	AEH50408.1;
ORTHOMCL163(20 genes,20 taxa):	NZ_LN824141.1_prot_WP_045088402.1_1703;	ABS60378.1;	AFG34396.1;	ACR78745.1;	AEX84643.1;	AFK06262.1;	ABX30944.1;	IX53_00080;	ACJ75081.1;	ABR30313.1;	NC_022792.1_prot_WP_038051299.1_754;	NC_022795.1_prot_WP_031502752.1_1853;	ABV33340.1;	NC_021214.1_prot_WP_004080857.1_797;	ADA66228.1;	ACM23948.1;	ABQ46151.1;	NZ_AP014510.1_prot_WP_041084254.1_1465;	NC_010483.1_prot_WP_012310337.1_120;	AEH50702.1;
ORTHOMCL165(20 genes,20 taxa):	NZ_LN824141.1_prot_WP_045087213.1_284;	ABS60064.1;	AFG34745.1;	ACR78999.1;	AEX85089.1;	AFK06529.1;	ABX31734.1;	IX53_09775;	ACJ75452.1;	ABR30646.1;	NC_022792.1_prot_WP_028843603.1_2033;	NC_022795.1_prot_WP_031502191.1_1016;	ABV34585.1;	NC_021214.1_prot_WP_004080860.1_794;	ADA66231.1;	ACM23951.1;	ABQ46154.1;	NZ_AP014510.1_prot_WP_041083193.1_1511;	NC_010483.1_prot_WP_012310340.1_123;	AEH52039.1;
ORTHOMCL166(20 genes,20 taxa):	NZ_LN824141.1_prot_WP_045087399.1_505;	ABS60469.1;	AFG35003.1;	ACR79681.1;	AEX84502.1;	AFK06275.1;	ABX31759.1;	IX53_08230;	ACJ76223.1;	ABR31429.1;	NC_022792.1_prot_WP_012002475.1_412;	NC_022795.1_prot_WP_031503118.1_1654;	ABV32994.1;	NC_021214.1_prot_WP_004080861.1_793;	ADA66232.1;	ACM23952.1;	ABQ46155.1;	NZ_AP014510.1_prot_WP_041083633.1_1846;	NC_010483.1_prot_WP_012310341.1_124;	AEH50900.1;
ORTHOMCL167(20 genes,20 taxa):	NZ_LN824141.1_prot_WP_045087401.1_507;	ABS60468.1;	AFG35002.1;	ACR79676.1;	AEX84504.1;	AFK06279.1;	ABX31757.1;	IX53_08260;	ACJ76224.1;	ABR31430.1;	NC_022792.1_prot_WP_012002476.1_413;	NC_022795.1_prot_WP_031503115.1_1655;	ABV32995.1;	NC_021214.1_prot_WP_004080862.1_792;	ADA66233.1;	ACM23953.1;	ABQ46156.1;	NZ_AP014510.1_prot_WP_041083632.1_1845;	NC_010483.1_prot_WP_004080862.1_125;	AEH50901.1;
ORTHOMCL168(20 genes,20 taxa):	NZ_LN824141.1_prot_WP_045087402.1_508;	ABS60467.1;	AFG35001.1;	ACR79678.1;	AEX84506.1;	AFK06278.1;	ABX31756.1;	IX53_08250;	ACJ76225.1;	ABR31431.1;	NC_022792.1_prot_WP_012002477.1_414;	NC_022795.1_prot_WP_031503113.1_1656;	ABV32996.1;	NC_021214.1_prot_WP_004080864.1_791;	ADA66234.1;	ACM23954.1;	ABQ46157.1;	NZ_AP014510.1_prot_WP_041083631.1_1844;	NC_010483.1_prot_WP_011942827.1_126;	AEH50902.1;
ORTHOMCL169(20 genes,20 taxa):	NZ_LN824141.1_prot_WP_045087403.1_509;	ABS60466.1;	AFG35000.1;	ACR79679.1;	AEX84507.1;	AFK06277.1;	ABX31755.1;	IX53_08245;	ACJ76227.1;	ABR31433.1;	NC_022792.1_prot_WP_012002478.1_415;	NC_022795.1_prot_WP_031503111.1_1657;	ABV32997.1;	NC_021214.1_prot_WP_004080868.1_789;	ADA66236.1;	ACM23956.1;	ABQ46159.1;	NZ_AP014510.1_prot_WP_041083630.1_1843;	NC_010483.1_prot_WP_011942829.1_128;	AEH50903.1;
ORTHOMCL170(20 genes,20 taxa):	NZ_LN824141.1_prot_WP_045087730.1_888;	ABS60338.1;	AFG34664.1;	ACR80611.1;	AEX85478.1;	AFK06367.1;	ABX30793.1;	IX53_08595;	ACJ75227.1;	ABR30246.1;	NC_022792.1_prot_WP_012003042.1_974;	NC_022795.1_prot_WP_031503626.1_1313;	ABV33561.1;	NC_021214.1_prot_WP_004080870.1_788;	ADA66237.1;	ACM23957.1;	ABQ46160.1;	NZ_AP014510.1_prot_WP_041082917.1_1328;	NC_010483.1_prot_WP_012310342.1_129;	AEH50668.1;
ORTHOMCL171(20 genes,20 taxa):	NZ_LN824141.1_prot_WP_045087025.1_54;	ABS60119.1;	AFG34918.1;	ACR80207.1;	AEX86045.1;	AFK07971.1;	ABX32576.1;	IX53_03320;	ACJ75575.1;	ABR30602.1;	NC_022792.1_prot_WP_028843910.1_1359;	NC_022795.1_prot_WP_031502580.1_1950;	ABV33928.1;	NC_021214.1_prot_WP_004080878.1_785;	ADA66240.1;	ACM23960.1;	ABQ46163.1;	NZ_AP014510.1_prot_WP_041081839.1_642;	NC_010483.1_prot_WP_012310344.1_131;	AEH51042.1;
ORTHOMCL172(20 genes,20 taxa):	NZ_LN824141.1_prot_WP_045088093.1_1330;	ABS60275.1;	AFG34361.1;	ACR79603.1;	AEX85230.1;	AFK07022.1;	ABX32631.1;	IX53_05190;	ACJ76222.1;	ABR31335.1;	NC_022792.1_prot_WP_012002115.1_62;	NC_022795.1_prot_WP_031502472.1_2013;	ABV32634.1;	NC_021214.1_prot_WP_004080919.1_763;	ADA66666.1;	ACM23981.1;	ABQ46185.1;	NZ_AP014510.1_prot_WP_041084086.1_839;	NC_010483.1_prot_WP_012310351.1_153;	AEH50855.1;
ORTHOMCL173(20 genes,20 taxa):	NZ_LN824141.1_prot_WP_045087691.1_845;	ABS60350.1;	AFG34407.1;	ACR80599.1;	AEX84537.1;	AFK06379.1;	ABX32546.1;	IX53_08660;	ACJ75850.1;	ABR30440.1;	NC_022792.1_prot_WP_028843241.1_917;	NC_022795.1_prot_WP_031503653.1_1297;	ABV33503.1;	NC_021214.1_prot_WP_004080925.1_760;	ADA66663.1;	ACM23984.1;	ABQ46188.1;	NZ_AP014510.1_prot_WP_041082650.1_1160;	NC_010483.1_prot_WP_012310353.1_156;	AEH51560.1;
ORTHOMCL174(20 genes,20 taxa):	NZ_LN824141.1_prot_WP_045087615.1_754;	ABS60680.1;	AFG35148.1;	ACR79638.1;	AEX85910.1;	AFK07466.1;	ABX31567.1;	IX53_05605;	ACJ75257.1;	ABR30350.1;	NC_022792.1_prot_WP_012002331.1_266;	NC_022795.1_prot_WP_031504509.1_510;	ABV32850.1;	NC_021214.1_prot_WP_004080928.1_759;	ADA66662.1;	ACM23985.1;	ABQ46189.1;	NZ_AP014510.1_prot_WP_041084309.1_1659;	NC_010483.1_prot_WP_011942850.1_157;	AEH51358.1;
ORTHOMCL175(20 genes,20 taxa):	NZ_LN824141.1_prot_WP_045087921.1_1123;	ABS60991.1;	AFG35497.1;	ACR79062.1;	AEX85203.1;	AFK06921.1;	ABX31199.1;	IX53_10090;	ACJ75298.1;	ABR30325.1;	NC_022792.1_prot_WP_028843272.1_861;	NC_022795.1_prot_WP_038059581.1_2045;	ABV33446.1;	NC_021214.1_prot_WP_004080931.1_758;	ADA66661.1;	ACM23987.1;	ABQ46190.1;	NZ_AP014510.1_prot_WP_041081647.1_505;	NC_010483.1_prot_WP_011942851.1_158;	AEH50605.1;
ORTHOMCL177(20 genes,20 taxa):	NZ_LN824141.1_prot_WP_045088397.1_1698;	ABS61085.1;	AFG35929.1;	ACR80229.1;	AEX86033.1;	AFK05968.1;	ABX32537.1;	IX53_04275;	ACJ75647.1;	ABR30787.1;	NC_022792.1_prot_WP_012003427.1_1382;	NC_022795.1_prot_WP_031505050.1_978;	ABV33951.1;	NC_021214.1_prot_WP_004080936.1_753;	ADA66656.1;	ACM23993.1;	ABQ46195.1;	NZ_AP014510.1_prot_WP_041082827.1_1274;	NC_010483.1_prot_WP_012310356.1_163;	AEH51113.1;
ORTHOMCL178(20 genes,20 taxa):	NZ_LN824141.1_prot_WP_045087075.1_121;	ABS61528.1;	AFG35995.1;	ACR79112.1;	AEX84964.1;	AFK07148.1;	ABX31544.1;	IX53_07090;	ACJ74949.1;	ABR30098.1;	NC_022792.1_prot_WP_012002560.1_496;	NC_022795.1_prot_WP_031502977.1_1733;	ABV33079.1;	NC_021214.1_prot_WP_004080969.1_738;	ADA66641.1;	ACM24013.1;	ABQ46211.1;	NZ_AP014510.1_prot_WP_041083582.1_1784;	NC_010483.1_prot_WP_012310371.1_179;	AEH50975.1;
ORTHOMCL179(20 genes,20 taxa):	NZ_LN824141.1_prot_WP_045088016.1_1239;	ABS60781.1;	AFG35389.1;	ACR79116.1;	AEX85511.1;	AFK07151.1;	ABX32051.1;	IX53_07070;	ACJ74855.1;	ABR30003.1;	NC_022792.1_prot_WP_012002555.1_491;	NC_022795.1_prot_WP_038059566.1_1728;	ABV33074.1;	NC_021214.1_prot_WP_004080977.1_734;	ADA66637.1;	ACM24017.1;	ABQ46215.1;	NZ_AP014510.1_prot_WP_041083586.1_1789;	NC_010483.1_prot_WP_012310373.1_183;	AEH50970.1;
ORTHOMCL180(20 genes,20 taxa):	NZ_LN824141.1_prot_WP_045087853.1_1032;	ABS60580.1;	AFG35056.1;	ACR80766.1;	AEX84873.1;	AFK08294.1;	ABX31559.1;	IX53_01430;	ACJ76106.1;	ABR31176.1;	NC_022792.1_prot_WP_012004018.1_1991;	NC_022795.1_prot_WP_031502246.1_1050;	ABV34542.1;	NC_021214.1_prot_WP_004080983.1_731;	ADA66634.1;	ACM24020.1;	ABQ46218.1;	NZ_AP014510.1_prot_WP_041081181.1_183;	NC_010483.1_prot_WP_012310374.1_185;	AEH52007.1;
ORTHOMCL181(20 genes,20 taxa):	NZ_LN824141.1_prot_WP_045087917.1_1118;	ABS60734.1;	AFG35586.1;	ACR78759.1;	AEX86112.1;	AFK06248.1;	ABX31193.1;	IX53_00150;	ACJ76294.1;	ABR31380.1;	NC_022792.1_prot_WP_028843343.1_663;	NC_022795.1_prot_WP_031504135.1_714;	ABV33248.1;	NC_021214.1_prot_WP_010865195.1_727;	ADA66630.1;	ACM24024.1;	ABQ46222.1;	NZ_AP014510.1_prot_WP_041081943.1_704;	NC_010483.1_prot_WP_012310377.1_189;	AEH51139.1;
ORTHOMCL182(20 genes,20 taxa):	NZ_LN824141.1_prot_WP_045088753.1_1774;	ABS60933.1;	AFG35440.1;	ACR78763.1;	AEX86328.1;	AFK06244.1;	ABX31948.1;	IX53_00170;	ACJ76092.1;	ABR31163.1;	NC_022792.1_prot_WP_012002734.1_668;	NC_022795.1_prot_WP_031504146.1_709;	ABV33253.1;	NC_021214.1_prot_WP_004080995.1_722;	ADA66625.1;	ACM24029.1;	ABQ46227.1;	NZ_AP014510.1_prot_WP_041084074.1_709;	NC_010483.1_prot_WP_012310382.1_194;	AEH51134.1;
ORTHOMCL183(20 genes,20 taxa):	NZ_LN824141.1_prot_WP_045088083.1_1318;	ABS60932.1;	AFG35439.1;	ACR80635.1;	AEX84549.1;	AFK07515.1;	ABX32621.1;	IX53_09430;	ACJ76093.1;	ABR31164.1;	NC_022792.1_prot_WP_028843342.1_669;	NC_022795.1_prot_WP_031504148.1_708;	ABV33254.1;	NC_021214.1_prot_WP_004080996.1_721;	ADA66624.1;	ACM24030.1;	ABQ46228.1;	NZ_AP014510.1_prot_WP_041081952.1_710;	NC_010483.1_prot_WP_012310383.1_195;	AEH51133.1;
ORTHOMCL184(20 genes,20 taxa):	NZ_LN824141.1_prot_WP_045088082.1_1317;	ABS60931.1;	AFG35438.1;	ACR80636.1;	AEX84548.1;	AFK07514.1;	ABX32620.1;	IX53_09425;	ACJ76094.1;	ABR31165.1;	NC_022792.1_prot_WP_012002736.1_670;	NC_022795.1_prot_WP_031504150.1_707;	ABV33255.1;	NC_021214.1_prot_WP_004080997.1_720;	ADA66623.1;	ACM24031.1;	ABQ46229.1;	NZ_AP014510.1_prot_WP_041081954.1_711;	NC_010483.1_prot_WP_012310384.1_196;	AEH51132.1;
ORTHOMCL185(20 genes,20 taxa):	NZ_LN824141.1_prot_WP_045087605.1_741;	ABS60048.1;	AFG34733.1;	ACR80385.1;	AEX86271.1;	AFK06302.1;	ABX31695.1;	IX53_00395;	ACJ76201.1;	ABR31358.1;	NC_022792.1_prot_WP_028843324.1_724;	NC_022795.1_prot_WP_031502815.1_1825;	ABV33310.1;	NC_021214.1_prot_WP_004081010.1_712;	ADA66616.1;	ACM24038.1;	ABQ46236.1;	NZ_AP014510.1_prot_WP_041083087.1_1436;	NC_010483.1_prot_WP_012310390.1_204;	AEH51015.1;
ORTHOMCL186(20 genes,20 taxa):	NZ_LN824141.1_prot_WP_045088236.1_1501;	ABS59952.1;	AFG34464.1;	ACR80148.1;	AEX84605.1;	AFK06011.1;	ABX32171.1;	IX53_04045;	ACJ75510.1;	ABR30550.1;	NC_022792.1_prot_WP_012002810.1_743;	NC_022795.1_prot_WP_031502772.1_1843;	ABV33329.1;	NC_021214.1_prot_WP_004081014.1_710;	ADA66614.1;	ACM24040.1;	ABQ46238.1;	NZ_AP014510.1_prot_WP_041084250.1_1454;	NC_010483.1_prot_WP_012310391.1_206;	AEH50692.1;
ORTHOMCL187(20 genes,20 taxa):	NZ_LN824141.1_prot_WP_045088481.1_5;	ABS60534.1;	AFG34606.1;	ACR80399.1;	AEX85604.1;	AFK07756.1;	ABX32520.1;	IX53_04660;	ACJ74781.1;	ABR29942.1;	NC_022792.1_prot_WP_012002811.1_744;	NC_022795.1_prot_WP_031502770.1_1844;	ABV33330.1;	NC_021214.1_prot_WP_004081016.1_709;	ADA66613.1;	ACM24041.1;	ABQ46239.1;	NZ_AP014510.1_prot_WP_041083109.1_1455;	NC_010483.1_prot_WP_011942893.1_207;	AEH50693.1;
ORTHOMCL188(20 genes,20 taxa):	NZ_LN824141.1_prot_WP_045087465.1_580;	ABS61166.1;	AFG35683.1;	ACR80060.1;	AEX86243.1;	AFK07182.1;	ABX31289.1;	IX53_04700;	ACJ75860.1;	ABR30450.1;	NC_022792.1_prot_WP_012002226.1_163;	NC_022795.1_prot_WP_031505176.1_296;	ABV32745.1;	NC_021214.1_prot_WP_004081018.1_707;	ADA66611.1;	ACM24043.1;	ABQ46241.1;	NZ_AP014510.1_prot_WP_041081079.1_61;	NC_010483.1_prot_WP_012310393.1_209;	AEH50394.1;
ORTHOMCL189(20 genes,20 taxa):	NZ_LN824141.1_prot_WP_045088574.1_578;	ABS61164.1;	AFG35685.1;	ACR80062.1;	AEX86241.1;	AFK07180.1;	ABX31287.1;	IX53_04690;	ACJ75862.1;	ABR30452.1;	NC_022792.1_prot_WP_012002228.1_165;	NC_022795.1_prot_WP_031505178.1_294;	ABV32747.1;	NC_021214.1_prot_WP_004081020.1_705;	ADA66609.1;	ACM24045.1;	ABQ46243.1;	NZ_AP014510.1_prot_WP_041081077.1_59;	NC_010483.1_prot_WP_012310395.1_211;	AEH50396.1;
ORTHOMCL190(20 genes,20 taxa):	NZ_LN824141.1_prot_WP_045086998.1_22;	ABS60743.1;	AFG35502.1;	ACR80281.1;	AEX84650.1;	AFK06126.1;	ABX32388.1;	IX53_03205;	ACJ76176.1;	ABR31272.1;	NC_022792.1_prot_WP_028843757.1_1718;	NC_022795.1_prot_WP_031504543.1_485;	ABV34268.1;	NC_021214.1_prot_WP_004081021.1_704;	ADA66608.1;	ACM24046.1;	ABQ46244.1;	NZ_AP014510.1_prot_WP_041083650.1_1870;	NC_010483.1_prot_WP_012310396.1_212;	AEH50411.1;
ORTHOMCL191(20 genes,20 taxa):	NZ_LN824141.1_prot_WP_045087003.1_27;	ABS60141.1;	AFG34893.1;	ACR79565.1;	AEX84579.1;	AFK07538.1;	ABX30769.1;	IX53_07585;	ACJ76151.1;	ABR31246.1;	NC_022792.1_prot_WP_028843519.1_217;	NC_022795.1_prot_WP_031505193.1_279;	ABV32801.1;	NC_021214.1_prot_WP_004081022.1_703;	ADA66607.1;	ACM24047.1;	ABQ46245.1;	NZ_AP014510.1_prot_WP_041081123.1_124;	NC_010483.1_prot_WP_011942899.1_213;	AEH51760.1;
ORTHOMCL192(20 genes,20 taxa):	NZ_LN824141.1_prot_WP_045087008.1_32;	ABS60136.1;	AFG34898.1;	ACR79566.1;	AEX84584.1;	AFK07539.1;	ABX30764.1;	IX53_07590;	ACJ76290.1;	ABR31376.1;	NC_022792.1_prot_WP_028843516.1_220;	NC_022795.1_prot_WP_031505196.1_276;	ABV32804.1;	NC_021214.1_prot_WP_004081029.1_699;	ADA66603.1;	ACM24051.1;	ABQ46249.1;	NZ_AP014510.1_prot_WP_041081120.1_121;	NC_010483.1_prot_WP_012310398.1_217;	AEH51757.1;
ORTHOMCL193(20 genes,20 taxa):	NZ_LN824141.1_prot_WP_045087210.1_281;	ABS61177.1;	AFG35805.1;	ACR80162.1;	AEX84809.1;	AFK06025.1;	ABX31731.1;	IX53_03965;	ACJ75068.1;	ABR30151.1;	NC_022792.1_prot_WP_012002286.1_221;	NC_022795.1_prot_WP_031505197.1_275;	ABV32805.1;	NC_021214.1_prot_WP_004081030.1_698;	ADA66602.1;	ACM24052.1;	ABQ46250.1;	NZ_AP014510.1_prot_WP_041083980.1_120;	NC_010483.1_prot_WP_004081030.1_218;	AEH51756.1;
ORTHOMCL194(20 genes,20 taxa):	NZ_LN824141.1_prot_WP_045087291.1_377;	ABS61611.1;	AFG36098.1;	ACR80161.1;	AEX85213.1;	AFK06024.1;	ABX31069.1;	IX53_03975;	ACJ76114.1;	ABR31184.1;	NC_022792.1_prot_WP_028843515.1_223;	NC_022795.1_prot_WP_038059873.1_273;	ABV32807.1;	NC_021214.1_prot_WP_004081032.1_696;	ADA66600.1;	ACM24054.1;	ABQ46252.1;	NZ_AP014510.1_prot_WP_041083978.1_118;	NC_010483.1_prot_WP_012310400.1_220;	AEH51754.1;
ORTHOMCL195(20 genes,20 taxa):	NZ_LN824141.1_prot_WP_045087390.1_495;	ABS60295.1;	AFG34261.1;	ACR79162.1;	AEX85756.1;	AFK07810.1;	ABX31793.1;	IX53_06045;	ACJ75753.1;	ABR30889.1;	NC_022792.1_prot_WP_028843933.1_1317;	NC_022795.1_prot_WP_031505238.1_1551;	ABV33878.1;	NC_021214.1_prot_WP_004081033.1_695;	ADA66599.1;	ACM24055.1;	ABQ46253.1;	NZ_AP014510.1_prot_WP_041082386.1_996;	NC_010483.1_prot_WP_004081033.1_221;	AEH51438.1;
ORTHOMCL196(20 genes,20 taxa):	NZ_LN824141.1_prot_WP_045088565.1_496;	ABS60524.1;	AFG34385.1;	ACR79161.1;	AEX85755.1;	AFK07809.1;	ABX31792.1;	IX53_06050;	ACJ74753.1;	ABR29914.1;	NC_022792.1_prot_WP_028843934.1_1316;	NC_022795.1_prot_WP_031505237.1_1552;	ABV33877.1;	NC_021214.1_prot_WP_004081034.1_694;	ADA66598.1;	ACM24056.1;	ABQ46254.1;	NZ_AP014510.1_prot_WP_041082384.1_995;	NC_010483.1_prot_WP_004081034.1_222;	AEH51439.1;
ORTHOMCL197(20 genes,20 taxa):	NZ_LN824141.1_prot_WP_045088266.1_1536;	ABS61429.1;	AFG35865.1;	ACR80455.1;	AEX85148.1;	AFK06960.1;	ABX32093.1;	IX53_05585;	ACJ75453.1;	ABR30645.1;	NC_022792.1_prot_WP_038051207.1_613;	NC_022795.1_prot_WP_031503153.1_1633;	ABV33198.1;	NC_021214.1_prot_WP_004081038.1_692;	ADA66596.1;	ACM24058.1;	ABQ46256.1;	NZ_AP014510.1_prot_WP_041083241.1_1540;	NC_010483.1_prot_WP_012310402.1_224;	AEH50776.1;
ORTHOMCL198(20 genes,20 taxa):	NZ_LN824141.1_prot_WP_045087207.1_277;	ABS60954.1;	AFG35459.1;	ACR80797.1;	AEX84695.1;	AFK06601.1;	ABX31727.1;	IX53_01475;	ACJ75690.1;	ABR30845.1;	NC_022792.1_prot_WP_038051571.1_1421;	NC_022795.1_prot_WP_031503360.1_1460;	ABV33988.1;	NC_021214.1_prot_WP_004081059.1_684;	ADA66588.1;	ACM24066.1;	ABQ46264.1;	NZ_AP014510.1_prot_WP_041082196.1_863;	NC_010483.1_prot_WP_004081059.1_232;	AEH50226.1;
ORTHOMCL199(20 genes,20 taxa):	NZ_LN824141.1_prot_WP_045088136.1_1378;	ABS60955.1;	AFG35460.1;	ACR80619.1;	AEX85990.1;	AFK06360.1;	ABX32401.1;	IX53_08555;	ACJ75689.1;	ABR30844.1;	NC_022792.1_prot_WP_012003465.1_1422;	NC_022795.1_prot_WP_038059698.1_1459;	ABV33989.1;	NC_021214.1_prot_WP_004081061.1_683;	ADA66587.1;	ACM24067.1;	ABQ46265.1;	NZ_AP014510.1_prot_WP_041082194.1_862;	NC_010483.1_prot_WP_011942908.1_233;	AEH50225.1;
ORTHOMCL200(20 genes,20 taxa):	NZ_LN824141.1_prot_WP_045088520.1_230;	ABS61484.1;	AFG36035.1;	ACR80717.1;	AEX85682.1;	AFK05782.1;	ABX32023.1;	IX53_02450;	ACJ75020.1;	ABR30200.1;	NC_022792.1_prot_WP_038051349.1_280;	NC_022795.1_prot_WP_031504489.1_524;	ABV32864.1;	NC_021214.1_prot_WP_004081068.1_680;	ADA66584.1;	ACM24070.1;	ABQ46268.1;	NZ_AP014510.1_prot_WP_041083403.1_1645;	NC_010483.1_prot_WP_004081068.1_236;	AEH51344.1;
ORTHOMCL201(20 genes,20 taxa):	NZ_LN824141.1_prot_WP_045087609.1_747;	ABS60641.1;	AFG35101.1;	ACR80712.1;	AEX85180.1;	AFK05778.1;	ABX31690.1;	IX53_02155;	ACJ76005.1;	ABR31034.1;	NC_022792.1_prot_WP_012003441.1_1398;	NC_022795.1_prot_WP_031504806.1_82;	ABV33965.1;	NC_021214.1_prot_WP_004081070.1_679;	ADA66583.1;	ACM24071.1;	ABQ46269.1;	NZ_AP014510.1_prot_WP_041082854.1_1290;	NC_010483.1_prot_WP_012310405.1_237;	AEH51967.1;
ORTHOMCL202(20 genes,20 taxa):	NZ_LN824141.1_prot_WP_045087996.1_1213;	ABS60594.1;	AFG34417.1;	ACR80699.1;	AEX84569.1;	AFK05769.1;	ABX32147.1;	IX53_02105;	ACJ76044.1;	ABR31114.1;	NC_022792.1_prot_WP_012003044.1_976;	NC_022795.1_prot_WP_031503623.1_1315;	ABV33563.1;	NC_021214.1_prot_WP_004081072.1_678;	ADA66581.1;	ACM24073.1;	ABQ46271.1;	NZ_AP014510.1_prot_WP_041082915.1_1326;	NC_010483.1_prot_WP_012310407.1_239;	AEH50670.1;
ORTHOMCL203(20 genes,20 taxa):	NZ_LN824141.1_prot_WP_045087995.1_1212;	ABS60595.1;	AFG34415.1;	ACR80698.1;	AEX84568.1;	AFK05768.1;	ABX32148.1;	IX53_02100;	ACJ76045.1;	ABR31115.1;	NC_022792.1_prot_WP_012003045.1_977;	NC_022795.1_prot_WP_031503621.1_1316;	ABV33564.1;	NC_021214.1_prot_WP_004081074.1_677;	ADA66580.1;	ACM24074.1;	ABQ46272.1;	NZ_AP014510.1_prot_WP_041082913.1_1325;	NC_010483.1_prot_WP_012310408.1_240;	AEH50671.1;
ORTHOMCL204(20 genes,20 taxa):	NZ_LN824141.1_prot_WP_045088244.1_1511;	ABS60143.1;	AFG34891.1;	ACR80696.1;	AEX84528.1;	AFK05766.1;	ABX32117.1;	IX53_02090;	ACJ76149.1;	ABR31244.1;	NC_022792.1_prot_WP_012003047.1_979;	NC_022795.1_prot_WP_031503617.1_1318;	ABV33566.1;	NC_021214.1_prot_WP_004081077.1_675;	ADA66578.1;	ACM24076.1;	ABQ46274.1;	NZ_AP014510.1_prot_WP_041082909.1_1323;	NC_010483.1_prot_WP_012310409.1_241;	AEH50673.1;
ORTHOMCL205(20 genes,20 taxa):	NZ_LN824141.1_prot_WP_045088659.1_1193;	ABS60840.1;	AFG35205.1;	ACR80215.1;	AEX85996.1;	AFK06070.1;	ABX32377.1;	IX53_03280;	ACJ76087.1;	ABR31158.1;	NC_022792.1_prot_WP_012003859.1_1832;	NC_022795.1_prot_WP_031504471.1_533;	ABV34383.1;	NC_021214.1_prot_WP_004081081.1_671;	ADA66574.1;	ACM24081.1;	ABQ46278.1;	NZ_AP014510.1_prot_WP_041082595.1_1132;	NC_010483.1_prot_WP_012310411.1_245;	AEH51847.1;
ORTHOMCL206(20 genes,20 taxa):	NZ_LN824141.1_prot_WP_045088537.1_334;	ABS60041.1;	AFG34726.1;	ACR80327.1;	AEX85856.1;	AFK06881.1;	ABX31682.1;	IX53_00310;	ACJ75077.1;	ABR30306.1;	NC_022792.1_prot_WP_012004049.1_2021;	NC_022795.1_prot_WP_031502198.1_1021;	ABV34573.1;	NC_021214.1_prot_WP_004081105.1_657;	ADA66560.1;	ACM24094.1;	ABQ46292.1;	NZ_AP014510.1_prot_WP_041081230.1_212;	NC_010483.1_prot_WP_012310423.1_259;	AEH52033.1;
ORTHOMCL207(20 genes,20 taxa):	NZ_LN824141.1_prot_WP_045087737.1_895;	ABS60653.1;	AFG35112.1;	ACR78953.1;	AEX86258.1;	AFK06764.1;	ABX30800.1;	IX53_01980;	ACJ75617.1;	ABR30771.1;	NC_022792.1_prot_WP_012003006.1_939;	NC_022795.1_prot_WP_031502847.1_1804;	ABV33525.1;	NC_021214.1_prot_WP_004081106.1_656;	ADA66559.1;	ACM24095.1;	ABQ46293.1;	NZ_AP014510.1_prot_WP_041081678.1_526;	NC_010483.1_prot_WP_012310424.1_260;	AEH51100.1;
ORTHOMCL209(20 genes,20 taxa):	NZ_LN824141.1_prot_WP_045088201.1_1460;	ABS60045.1;	AFG34730.1;	ACR78970.1;	AEX86082.1;	AFK06502.1;	ABX32226.1;	IX53_09620;	ACJ76178.1;	ABR31274.1;	NC_022792.1_prot_WP_028843350.1_643;	NC_022795.1_prot_WP_031504100.1_734;	ABV33228.1;	NC_021214.1_prot_WP_010865178.1_650;	ADA66553.1;	ACM24101.1;	ABQ46299.1;	NZ_AP014510.1_prot_WP_041081788.1_607;	NC_010483.1_prot_WP_010865178.1_266;	AEH51154.1;
ORTHOMCL210(20 genes,20 taxa):	NZ_LN824141.1_prot_WP_045088612.1_838;	ABS59947.1;	AFG34459.1;	ACR80284.1;	AEX85620.1;	AFK06129.1;	ABX32115.1;	IX53_03220;	ACJ74700.1;	ABR31733.1;	NC_022792.1_prot_WP_028843756.1_1719;	NC_022795.1_prot_WP_031504542.1_486;	ABV34269.1;	NC_021214.1_prot_WP_004081113.1_649;	ADA66552.1;	ACM24102.1;	ABQ46300.1;	NZ_AP014510.1_prot_WP_041083651.1_1871;	NC_010483.1_prot_WP_004081113.1_267;	AEH50410.1;
ORTHOMCL211(20 genes,20 taxa):	NZ_LN824141.1_prot_WP_045088398.1_1699;	ABS60319.1;	AFG34637.1;	ACR80230.1;	AEX85188.1;	AFK05953.1;	ABX32538.1;	IX53_04280;	ACJ74788.1;	ABR29948.1;	NC_022792.1_prot_WP_012003426.1_1381;	NC_022795.1_prot_WP_031505049.1_979;	ABV33950.1;	NC_021214.1_prot_WP_004081141.1_642;	ADA66545.1;	ACM22180.1;	ABQ46307.1;	NZ_AP014510.1_prot_WP_041082826.1_1273;	NC_010483.1_prot_WP_011942945.1_274;	AEH51112.1;
ORTHOMCL212(20 genes,20 taxa):	NZ_LN824141.1_prot_WP_045087949.1_1157;	ABS60566.1;	AFG35070.1;	ACR80303.1;	AEX84998.1;	AFK07839.1;	ABX32557.1;	IX53_03090;	ACJ74957.1;	ABR30106.1;	NC_022792.1_prot_WP_012002583.1_518;	NC_022795.1_prot_WP_031504295.1_628;	ABV33102.1;	NC_021214.1_prot_WP_004081143.1_641;	ADA66544.1;	ACM22181.1;	ABQ46308.1;	NZ_AP014510.1_prot_WP_041084349.1_1761;	NC_010483.1_prot_WP_012310431.1_275;	AEH50467.1;
ORTHOMCL213(20 genes,20 taxa):	NZ_LN824141.1_prot_WP_045087739.1_897;	ABS60322.1;	AFG34634.1;	ACR80305.1;	AEX84499.1;	AFK06319.1;	ABX30802.1;	IX53_03080;	ACJ75804.1;	ABR30392.1;	NC_022792.1_prot_WP_012002582.1_517;	NC_022795.1_prot_WP_031504294.1_629;	ABV33101.1;	NC_021214.1_prot_WP_004081144.1_640;	ADA66543.1;	ACM22182.1;	ABQ46309.1;	NZ_AP014510.1_prot_WP_041083565.1_1762;	NC_010483.1_prot_WP_012310432.1_276;	AEH50468.1;
ORTHOMCL214(20 genes,20 taxa):	NZ_LN824141.1_prot_WP_045088592.1_732;	ABS61346.1;	AFG34229.1;	ACR80548.1;	AEX84466.1;	AFK06429.1;	ABX31890.1;	IX53_08910;	ACJ74964.1;	ABR30113.1;	NC_022792.1_prot_WP_012002580.1_515;	NC_022795.1_prot_WP_031504290.1_631;	ABV33099.1;	NC_021214.1_prot_WP_004081151.1_636;	ADA66540.1;	ACM22186.1;	ABQ46312.1;	NZ_AP014510.1_prot_WP_041084353.1_1764;	NC_010483.1_prot_WP_012310435.1_279;	AEH50470.1;
ORTHOMCL215(20 genes,20 taxa):	NZ_LN824141.1_prot_WP_045087245.1_319;	ABS59898.1;	AFG34263.1;	ACR78743.1;	AEX85625.1;	AFK06263.1;	ABX31666.1;	IX53_00070;	ACJ75332.1;	ABR30523.1;	NC_022792.1_prot_WP_028843651.1_1911;	NC_022795.1_prot_WP_031502294.1_853;	ABV34460.1;	NC_021214.1_prot_WP_004081154.1_633;	ADA66538.1;	ACM22189.1;	ABQ46314.1;	NZ_AP014510.1_prot_WP_041081712.1_551;	NC_010483.1_prot_WP_012310438.1_282;	AEH51668.1;
ORTHOMCL216(20 genes,20 taxa):	NZ_LN824141.1_prot_WP_045088432.1_1735;	ABS59897.1;	AFG34262.1;	ACR78741.1;	AEX85098.1;	AFK06265.1;	ABX32307.1;	IX53_00060;	ACJ75333.1;	ABR30524.1;	NC_022792.1_prot_WP_012004019.1_1992;	NC_022795.1_prot_WP_031502292.1_852;	ABV34543.1;	NC_021214.1_prot_WP_004081159.1_628;	ADA66533.1;	ACM22194.1;	ABQ46319.1;	NZ_AP014510.1_prot_WP_041081183.1_184;	NC_010483.1_prot_WP_012310442.1_286;	AEH51669.1;
ORTHOMCL218(20 genes,20 taxa):	NZ_LN824141.1_prot_WP_045087467.1_584;	ABS60528.1;	AFG34381.1;	ACR79038.1;	AEX84885.1;	AFK06658.1;	ABX31294.1;	IX53_09955;	ACJ75117.1;	ABR30502.1;	NC_022792.1_prot_WP_012002875.1_809;	NC_022795.1_prot_WP_031504197.1_681;	ABV33394.1;	NC_021214.1_prot_WP_004081224.1_595;	ADA66489.1;	ACM22233.1;	ABQ46342.1;	NZ_AP014510.1_prot_WP_041081608.1_478;	NC_010483.1_prot_WP_012310475.1_327;	AEH51518.1;
ORTHOMCL219(20 genes,20 taxa):	NZ_LN824141.1_prot_WP_045088576.1_583;	ABS60529.1;	AFG34380.1;	ACR79039.1;	AEX84886.1;	AFK06657.1;	ABX31293.1;	IX53_09950;	ACJ75118.1;	ABR30501.1;	NC_022792.1_prot_WP_028843299.1_810;	NC_022795.1_prot_WP_031504200.1_680;	ABV33395.1;	NC_021214.1_prot_WP_004081225.1_594;	ADA66488.1;	ACM22234.1;	ABQ46343.1;	NZ_AP014510.1_prot_WP_041081606.1_477;	NC_010483.1_prot_WP_012310476.1_328;	AEH51517.1;
ORTHOMCL220(20 genes,20 taxa):	NZ_LN824141.1_prot_WP_045088575.1_582;	ABS60530.1;	AFG34379.1;	ACR79040.1;	AEX84887.1;	AFK06656.1;	ABX31292.1;	IX53_09945;	ACJ75119.1;	ABR30500.1;	NC_022792.1_prot_WP_028843298.1_811;	NC_022795.1_prot_WP_031504202.1_679;	ABV33396.1;	NC_021214.1_prot_WP_004081227.1_593;	ADA66487.1;	ACM22235.1;	ABQ46344.1;	NZ_AP014510.1_prot_WP_041081605.1_476;	NC_010483.1_prot_WP_012310477.1_329;	AEH51516.1;
ORTHOMCL222(20 genes,20 taxa):	NZ_LN824141.1_prot_WP_045088719.1_1549;	ABS60260.1;	AFG34345.1;	ACR79001.1;	AEX85499.1;	AFK06531.1;	ABX32081.1;	IX53_09785;	ACJ76254.1;	ABR31460.1;	NC_022792.1_prot_WP_012002824.1_757;	NC_022795.1_prot_WP_038059554.1_1856;	ABV33343.1;	NC_021214.1_prot_WP_004081251.1_586;	ADA66481.1;	ACM22242.1;	ABQ46350.1;	NZ_AP014510.1_prot_WP_041083128.1_1468;	NC_010483.1_prot_WP_012310483.1_335;	AEH50705.1;
ORTHOMCL223(20 genes,20 taxa):	NZ_LN824141.1_prot_WP_045088237.1_1502;	ABS60742.1;	AFG35501.1;	ACR78991.1;	AEX85801.1;	AFK06522.1;	ABX32125.1;	IX53_09735;	ACJ76000.1;	ABR31029.1;	NC_022792.1_prot_WP_038051686.1_2002;	NC_022795.1_prot_WP_031502231.1_1041;	ABV34553.1;	NC_021214.1_prot_WP_004081264.1_580;	ADA66475.1;	ACM22248.1;	ABQ46356.1;	NZ_AP014510.1_prot_WP_041083990.1_193;	NC_010483.1_prot_WP_012310489.1_341;	AEH52015.1;
ORTHOMCL224(20 genes,20 taxa):	NZ_LN824141.1_prot_WP_045088711.1_1505;	ABS61341.1;	AFG34234.1;	ACR78994.1;	AEX85804.1;	AFK06525.1;	ABX32123.1;	IX53_09750;	ACJ76061.1;	ABR31131.1;	NC_022792.1_prot_WP_038051240.1_308;	NC_022795.1_prot_WP_031504731.1_30;	ABV32889.1;	NC_021214.1_prot_WP_010865154.1_577;	ADA66472.1;	ACM22251.1;	ABQ46359.1;	NZ_AP014510.1_prot_WP_041084010.1_313;	NC_010483.1_prot_WP_010865154.1_344;	AEH51786.1;
ORTHOMCL225(20 genes,20 taxa):	NZ_LN824141.1_prot_WP_045087258.1_336;	ABS61612.1;	AFG36099.1;	ACR80331.1;	AEX85859.1;	AFK06877.1;	ABX31684.1;	IX53_00290;	ACJ75779.1;	ABR30913.1;	NC_022792.1_prot_WP_012002931.1_865;	NC_022795.1_prot_WP_031502407.1_2049;	ABV33450.1;	NC_021214.1_prot_WP_008192388.1_574;	ADA66469.1;	ACM22254.1;	ABQ46362.1;	NZ_AP014510.1_prot_WP_041081653.1_509;	NC_010483.1_prot_WP_011942997.1_347;	AEH50609.1;
ORTHOMCL226(20 genes,20 taxa):	NZ_LN824141.1_prot_WP_045087191.1_258;	ABS60830.1;	AFG35195.1;	ACR80276.1;	AEX85675.1;	AFK06119.1;	ABX30955.1;	IX53_03175;	ACJ75820.1;	ABR30410.1;	NC_022792.1_prot_WP_038051285.1_833;	NC_022795.1_prot_WP_038059834.1_68;	ABV33418.1;	NC_021214.1_prot_WP_004081273.1_573;	ADA66468.1;	ACM22256.1;	ABQ46363.1;	NZ_AP014510.1_prot_WP_041084234.1_1418;	NC_010483.1_prot_WP_011942998.1_348;	AEH51034.1;
ORTHOMCL227(20 genes,20 taxa):	NZ_LN824141.1_prot_WP_045087257.1_335;	ABS59896.1;	AFG34252.1;	ACR80329.1;	AEX85858.1;	AFK06879.1;	ABX31683.1;	IX53_00300;	ACJ76118.1;	ABR31188.1;	NC_022792.1_prot_WP_012004048.1_2020;	NC_022795.1_prot_WP_031502201.1_1022;	ABV34572.1;	NC_021214.1_prot_WP_004081274.1_572;	ADA66467.1;	ACM22257.1;	ABQ46364.1;	NZ_AP014510.1_prot_WP_041081228.1_211;	NC_010483.1_prot_WP_011942999.1_349;	AEH52032.1;
ORTHOMCL228(20 genes,20 taxa):	NZ_LN824141.1_prot_WP_045087654.1_801;	ABS60027.1;	AFG34541.1;	ACR80259.1;	AEX85045.1;	AFK06105.1;	ABX31597.1;	IX53_02975;	ACJ74930.1;	ABR30079.1;	NC_022792.1_prot_WP_012003566.1_1523;	NC_022795.1_prot_WP_031502527.1_1984;	ABV34090.1;	NC_021214.1_prot_WP_010865152.1_570;	ADA66465.1;	ACM22259.1;	ABQ46366.1;	NZ_AP014510.1_prot_WP_041081819.1_628;	NC_010483.1_prot_WP_012310493.1_351;	AEH51990.1;
ORTHOMCL229(20 genes,20 taxa):	NZ_LN824141.1_prot_WP_045088217.1_1480;	ABS61555.1;	AFG35968.1;	ACR79600.1;	AEX85805.1;	AFK07228.1;	ABX32187.1;	IX53_05210;	ACJ75763.1;	ABR30899.1;	NC_022792.1_prot_WP_012002291.1_226;	NC_022795.1_prot_WP_031505201.1_271;	ABV32810.1;	NC_021214.1_prot_WP_004081287.1_564;	ADA66459.1;	ACM22266.1;	ABQ46372.1;	NZ_AP014510.1_prot_WP_041081118.1_115;	NC_010483.1_prot_WP_011943007.1_357;	AEH50307.1;
ORTHOMCL230(20 genes,20 taxa):	NZ_LN824141.1_prot_WP_045088200.1_1459;	ABS61554.1;	AFG35967.1;	ACR78971.1;	AEX84912.1;	AFK06503.1;	ABX32227.1;	IX53_09625;	ACJ74778.1;	ABR29939.1;	NC_022792.1_prot_WP_028843351.1_642;	NC_022795.1_prot_WP_031504098.1_735;	ABV33227.1;	NC_021214.1_prot_WP_004081288.1_563;	ADA66458.1;	ACM22267.1;	ABQ46373.1;	NZ_AP014510.1_prot_WP_041081786.1_606;	NC_010483.1_prot_WP_011943008.1_358;	AEH51155.1;
ORTHOMCL231(20 genes,20 taxa):	NZ_LN824141.1_prot_WP_045088020.1_1243;	ABS60521.1;	AFG34388.1;	ACR80820.1;	AEX85795.1;	AFK06946.1;	ABX30968.1;	IX53_10225;	ACJ74684.1;	ABR31715.1;	NC_022792.1_prot_WP_012003134.1_1072;	NC_022795.1_prot_WP_038059650.1_1385;	ABV33653.1;	NC_021214.1_prot_WP_004081289.1_562;	ADA66457.1;	ACM22268.1;	ABQ46374.1;	NZ_AP014510.1_prot_WP_041081638.1_497;	NC_010483.1_prot_WP_012310499.1_359;	AEH51332.1;
ORTHOMCL232(20 genes,20 taxa):	NZ_LN824141.1_prot_WP_045087704.1_860;	ABS60857.1;	AFG35369.1;	ACR80289.1;	AEX86368.1;	AFK06280.1;	ABX30780.1;	IX53_03250;	ACJ74579.1;	ABR31632.1;	NC_022792.1_prot_WP_012002446.1_384;	NC_022795.1_prot_WP_031504877.1_129;	ABV32965.1;	NC_021214.1_prot_WP_004081291.1_560;	ADA66455.1;	ACM22270.1;	ABQ46376.1;	NZ_AP014510.1_prot_WP_041083384.1_1634;	NC_010483.1_prot_WP_012310501.1_361;	AEH51706.1;
ORTHOMCL233(20 genes,20 taxa):	NZ_LN824141.1_prot_WP_045088686.1_1375;	ABS61601.1;	AFG36088.1;	ACR80396.1;	AEX86223.1;	AFK05943.1;	ABX32407.1;	IX53_02200;	ACJ76314.1;	ABR31400.1;	NC_022792.1_prot_WP_028843511.1_231;	NC_022795.1_prot_WP_031505154.1_318;	ABV32815.1;	NC_021214.1_prot_WP_004081293.1_559;	ADA66454.1;	ACM22271.1;	ABQ46377.1;	NZ_AP014510.1_prot_WP_041081135.1_136;	NC_010483.1_prot_WP_004081293.1_362;	AEH50357.1;
ORTHOMCL234(20 genes,20 taxa):	NZ_LN824141.1_prot_WP_045088132.1_1372;	ABS61604.1;	AFG36091.1;	ACR80395.1;	AEX86226.1;	AFK05942.1;	ABX32410.1;	IX53_02205;	ACJ76317.1;	ABR31403.1;	NC_022792.1_prot_WP_012002196.1_133;	NC_022795.1_prot_WP_031505157.1_315;	ABV32715.1;	NC_021214.1_prot_WP_004081299.1_556;	ADA66451.1;	ACM22274.1;	ABQ46380.1;	NZ_AP014510.1_prot_WP_041081310.1_264;	NC_010483.1_prot_WP_004081299.1_365;	AEH50363.1;
ORTHOMCL235(20 genes,20 taxa):	NZ_LN824141.1_prot_WP_045087280.1_361;	ABS60854.1;	AFG35372.1;	ACR80692.1;	AEX84806.1;	AFK06347.1;	ABX31087.1;	IX53_02070;	ACJ75121.1;	ABR30498.1;	NC_022792.1_prot_WP_028843422.1_404;	NC_022795.1_prot_WP_031504615.1_440;	ABV32986.1;	NC_021214.1_prot_WP_004081371.1_523;	ADA66419.1;	ACM22311.1;	ABQ46412.1;	NZ_AP014510.1_prot_WP_041084393.1_1859;	NC_010483.1_prot_WP_008192245.1_398;	AEH50896.1;
ORTHOMCL237(20 genes,20 taxa):	NZ_LN824141.1_prot_WP_045087736.1_894;	ABS60757.1;	AFG35416.1;	ACR79460.1;	AEX85140.1;	AFK07218.1;	ABX30799.1;	IX53_05005;	ACJ74961.1;	ABR30110.1;	NC_022792.1_prot_WP_012002740.1_674;	NC_022795.1_prot_WP_031504157.1_703;	ABV33259.1;	NC_021214.1_prot_WP_004081384.1_516;	ADA66412.1;	ACM22318.1;	ABQ46419.1;	NZ_AP014510.1_prot_WP_041081961.1_715;	NC_010483.1_prot_WP_012310526.1_405;	AEH51127.1;
ORTHOMCL238(20 genes,20 taxa):	NZ_LN824141.1_prot_WP_045088273.1_1544;	ABS59988.1;	AFG34499.1;	ACR79006.1;	AEX85503.1;	AFK06535.1;	ABX32085.1;	IX53_09810;	ACJ74612.1;	ABR31599.1;	NC_022792.1_prot_WP_012002829.1_762;	NC_022795.1_prot_WP_031502737.1_1861;	ABV33348.1;	NC_021214.1_prot_WP_004081393.1_514;	ADA66410.1;	ACM22320.1;	ABQ46421.1;	NZ_AP014510.1_prot_WP_041083136.1_1473;	NC_010483.1_prot_WP_012310528.1_407;	AEH50709.1;
ORTHOMCL239(20 genes,20 taxa):	NZ_LN824141.1_prot_WP_045088274.1_1545;	ABS60142.1;	AFG34892.1;	ACR79005.1;	AEX85502.1;	AFK06534.1;	ABX32084.1;	IX53_09805;	ACJ76150.1;	ABR31245.1;	NC_022792.1_prot_WP_012002828.1_761;	NC_022795.1_prot_WP_031502739.1_1860;	ABV33347.1;	NC_021214.1_prot_WP_004081395.1_513;	ADA66409.1;	ACM22321.1;	ABQ46422.1;	NZ_AP014510.1_prot_WP_041083135.1_1472;	NC_010483.1_prot_WP_012310529.1_408;	AEH50708.1;
ORTHOMCL240(20 genes,20 taxa):	NZ_LN824141.1_prot_WP_045088717.1_1546;	ABS61600.1;	AFG36087.1;	ACR79004.1;	AEX85501.1;	AFK06533.1;	ABX32083.1;	IX53_09800;	ACJ76313.1;	ABR31399.1;	NC_022792.1_prot_WP_028843316.1_760;	NC_022795.1_prot_WP_031502741.1_1859;	ABV33346.1;	NC_021214.1_prot_WP_004081397.1_512;	ADA66408.1;	ACM22322.1;	ABQ46423.1;	NZ_AP014510.1_prot_WP_041083133.1_1471;	NC_010483.1_prot_WP_012310530.1_409;	AEH50707.1;
ORTHOMCL241(20 genes,20 taxa):	NZ_LN824141.1_prot_WP_045088679.1_1304;	ABS60259.1;	AFG34344.1;	ACR80343.1;	AEX85097.1;	AFK06153.1;	ABX32605.1;	IX53_02865;	ACJ76253.1;	ABR31459.1;	NC_022792.1_prot_WP_012002823.1_756;	NC_022795.1_prot_WP_031502749.1_1855;	ABV33342.1;	NC_021214.1_prot_WP_004081401.1_509;	ADA66405.1;	ACM22325.1;	ABQ46425.1;	NZ_AP014510.1_prot_WP_041083126.1_1467;	NC_010483.1_prot_WP_012310532.1_412;	AEH50704.1;
ORTHOMCL242(20 genes,20 taxa):	NZ_LN824141.1_prot_WP_045087178.1_240;	ABS60564.1;	AFG35072.1;	ACR80344.1;	AEX85940.1;	AFK06152.1;	ABX32336.1;	IX53_02860;	ACJ74955.1;	ABR30104.1;	NC_022792.1_prot_WP_012002822.1_755;	NC_022795.1_prot_WP_031502751.1_1854;	ABV33341.1;	NC_021214.1_prot_WP_004081403.1_508;	ADA66404.1;	ACM22326.1;	ABQ46426.1;	NZ_AP014510.1_prot_WP_041083124.1_1466;	NC_010483.1_prot_WP_011943053.1_413;	AEH50703.1;
ORTHOMCL243(20 genes,20 taxa):	NZ_LN824141.1_prot_WP_045088685.1_1371;	ABS61605.1;	AFG36092.1;	ACR78847.1;	AEX86227.1;	AFK06621.1;	ABX32411.1;	IX53_01610;	ACJ76318.1;	ABR31404.1;	NC_022792.1_prot_WP_028843284.1_827;	NC_022795.1_prot_WP_031502828.1_1816;	ABV33412.1;	NC_021214.1_prot_WP_004081405.1_507;	ADA66403.1;	ACM22327.1;	ABQ46427.1;	NZ_AP014510.1_prot_WP_041083077.1_1427;	NC_010483.1_prot_WP_012310533.1_414;	AEH51024.1;
ORTHOMCL244(20 genes,20 taxa):	NZ_LN824141.1_prot_WP_045088474.1_1783;	ABS60535.1;	AFG34607.1;	ACR80397.1;	AEX86318.1;	AFK05944.1;	ABX31958.1;	IX53_02195;	ACJ74780.1;	ABR29941.1;	NC_022792.1_prot_WP_012002297.1_232;	NC_022795.1_prot_WP_031505153.1_319;	ABV32816.1;	NC_021214.1_prot_WP_004081418.1_501;	ADA66398.1;	ACM22333.1;	ABQ46432.1;	NZ_AP014510.1_prot_WP_041081134.1_135;	NC_010483.1_prot_WP_012310538.1_420;	AEH50356.1;
ORTHOMCL245(20 genes,20 taxa):	NZ_LN824141.1_prot_WP_045088667.1_1235;	ABS60014.1;	AFG34522.1;	ACR78928.1;	AEX85358.1;	AFK06738.1;	ABX32055.1;	IX53_01850;	ACJ74885.1;	ABR30034.1;	NC_022792.1_prot_WP_012003126.1_1064;	NC_022795.1_prot_WP_031503356.1_1463;	ABV33645.1;	NC_021214.1_prot_WP_004081422.1_498;	ADA66395.1;	ACM22336.1;	ABQ46435.1;	NZ_AP014510.1_prot_WP_041082202.1_867;	NC_010483.1_prot_WP_011943060.1_423;	AEH50229.1;
ORTHOMCL246(20 genes,20 taxa):	NZ_LN824141.1_prot_WP_045087171.1_232;	ABS60011.1;	AFG34525.1;	ACR78926.1;	AEX85878.1;	AFK06736.1;	ABX32028.1;	IX53_01840;	ACJ74882.1;	ABR30031.1;	NC_022792.1_prot_WP_012003129.1_1067;	NC_022795.1_prot_WP_031503351.1_1466;	ABV33648.1;	NC_021214.1_prot_WP_004081432.1_495;	ADA66392.1;	ACM22339.1;	ABQ46438.1;	NZ_AP014510.1_prot_WP_041084090.1_870;	NC_010483.1_prot_WP_012310543.1_426;	AEH50232.1;
ORTHOMCL247(20 genes,20 taxa):	NZ_LN824141.1_prot_WP_045087425.1_534;	ABS61386.1;	AFG34189.1;	ACR80317.1;	AEX86280.1;	AFK07850.1;	ABX31876.1;	IX53_04545;	ACJ74770.1;	ABR29931.1;	NC_022792.1_prot_WP_028843472.1_303;	NC_022795.1_prot_WP_031504725.1_26;	ABV32885.1;	NC_021214.1_prot_WP_004081434.1_493;	ADA66391.1;	ACM22340.1;	ABQ46439.1;	NZ_AP014510.1_prot_WP_041081388.1_318;	NC_010483.1_prot_WP_008192177.1_427;	AEH51771.1;
ORTHOMCL248(20 genes,20 taxa):	NZ_LN824141.1_prot_WP_045087426.1_535;	ABS61387.1;	AFG34188.1;	ACR80316.1;	AEX86279.1;	AFK07849.1;	ABX31875.1;	IX53_04550;	ACJ74771.1;	ABR29932.1;	NC_022792.1_prot_WP_012002367.1_304;	NC_022795.1_prot_WP_031504727.1_27;	ABV32886.1;	NC_021214.1_prot_WP_024103730.1_492;	ADA66390.1;	ACM22342.1;	ABQ46440.1;	NZ_AP014510.1_prot_WP_041081386.1_317;	NC_010483.1_prot_WP_008192171.1_428;	AEH51772.1;
ORTHOMCL249(20 genes,20 taxa):	NZ_LN824141.1_prot_WP_045088160.1_1408;	ABS60062.1;	AFG34743.1;	ACR80239.1;	AEX86345.1;	AFK05947.1;	ABX32272.1;	IX53_04325;	ACJ74541.1;	ABR31574.1;	NC_022792.1_prot_WP_012002697.1_631;	NC_022795.1_prot_WP_031504789.1_70;	ABV33216.1;	NC_021214.1_prot_WP_004081437.1_491;	ADA66389.1;	ACM22343.1;	ABQ46441.1;	NZ_AP014510.1_prot_WP_041083207.1_1522;	NC_010483.1_prot_WP_011943065.1_429;	AEH50409.1;
ORTHOMCL250(20 genes,20 taxa):	NZ_LN824141.1_prot_WP_045087934.1_1140;	ABS60685.1;	AFG35153.1;	ACR78959.1;	AEX84888.1;	AFK06491.1;	ABX30896.1;	IX53_09565;	ACJ75262.1;	ABR30345.1;	NC_022792.1_prot_WP_028843907.1_1362;	NC_022795.1_prot_WP_031502574.1_1953;	ABV33931.1;	NC_021214.1_prot_WP_004081452.1_484;	ADA66382.1;	ACM22351.1;	ABQ46448.1;	NZ_AP014510.1_prot_WP_041084064.1_639;	NC_010483.1_prot_WP_012310544.1_436;	AEH51045.1;
ORTHOMCL251(20 genes,20 taxa):	NZ_LN824141.1_prot_WP_045087935.1_1141;	ABS60684.1;	AFG35152.1;	ACR78960.1;	AEX84889.1;	AFK06492.1;	ABX30895.1;	IX53_09570;	ACJ75261.1;	ABR30346.1;	NC_022792.1_prot_WP_028843908.1_1361;	NC_022795.1_prot_WP_031502576.1_1952;	ABV33930.1;	NC_021214.1_prot_WP_004081454.1_483;	ADA66381.1;	ACM22352.1;	ABQ46449.1;	NZ_AP014510.1_prot_WP_041081835.1_640;	NC_010483.1_prot_WP_012310545.1_437;	AEH51044.1;
ORTHOMCL252(20 genes,20 taxa):	NZ_LN824141.1_prot_WP_045087278.1_358;	ABS61306.1;	AFG35572.1;	ACR79576.1;	AEX84591.1;	AFK07549.1;	ABX31092.1;	IX53_08200;	ACJ76080.1;	ABR31151.1;	NC_022792.1_prot_WP_028843864.1_1506;	NC_022795.1_prot_WP_031505089.1_940;	ABV34073.1;	NC_021214.1_prot_WP_004081456.1_482;	ADA66380.1;	ACM22353.1;	ABQ46450.1;	NZ_AP014510.1_prot_WP_041082982.1_1363;	NC_010483.1_prot_WP_011943070.1_438;	AEH51623.1;
ORTHOMCL253(20 genes,20 taxa):	NZ_LN824141.1_prot_WP_045087277.1_357;	ABS61307.1;	AFG35571.1;	ACR79575.1;	AEX84592.1;	AFK07548.1;	ABX31093.1;	IX53_08195;	ACJ76081.1;	ABR31152.1;	NC_022792.1_prot_WP_038051553.1_1505;	NC_022795.1_prot_WP_038059849.1_941;	ABV34072.1;	NC_021214.1_prot_WP_004081460.1_481;	ADA66379.1;	ACM22354.1;	ABQ46451.1;	NZ_AP014510.1_prot_WP_041082984.1_1364;	NC_010483.1_prot_WP_011943071.1_439;	AEH51624.1;
ORTHOMCL254(20 genes,20 taxa):	NZ_LN824141.1_prot_WP_045087276.1_356;	ABS60739.1;	AFG35591.1;	ACR79574.1;	AEX84593.1;	AFK07547.1;	ABX31094.1;	IX53_08190;	ACJ75027.1;	ABR30192.1;	NC_022792.1_prot_WP_028843865.1_1504;	NC_022795.1_prot_WP_031505087.1_942;	ABV34071.1;	NC_021214.1_prot_WP_004081463.1_480;	ADA66378.1;	ACM22355.1;	ABQ46452.1;	NZ_AP014510.1_prot_WP_041082985.1_1365;	NC_010483.1_prot_WP_011943072.1_440;	AEH51625.1;
ORTHOMCL255(20 genes,20 taxa):	NZ_LN824141.1_prot_WP_045087972.1_1183;	ABS60747.1;	AFG35506.1;	ACR79571.1;	AEX86314.1;	AFK07544.1;	ABX32367.1;	IX53_09100;	ACJ76173.1;	ABR31268.1;	NC_022792.1_prot_WP_038051260.1_960;	NC_022795.1_prot_WP_031502362.1_764;	ABV33547.1;	NC_021214.1_prot_WP_004081478.1_476;	ADA66374.1;	ACM22359.1;	ABQ46456.1;	NZ_AP014510.1_prot_WP_041084043.1_534;	NC_010483.1_prot_WP_012310546.1_444;	AEH50404.1;
ORTHOMCL256(20 genes,20 taxa):	NZ_LN824141.1_prot_WP_045087973.1_1184;	ABS60748.1;	AFG35507.1;	ACR79570.1;	AEX86313.1;	AFK07543.1;	ABX32368.1;	IX53_09095;	ACJ76172.1;	ABR31267.1;	NC_022792.1_prot_WP_012003027.1_959;	NC_022795.1_prot_WP_031502364.1_765;	ABV33546.1;	NC_021214.1_prot_WP_004081479.1_475;	ADA66373.1;	ACM22360.1;	ABQ46457.1;	NZ_AP014510.1_prot_WP_041081689.1_533;	NC_010483.1_prot_WP_011943076.1_445;	AEH50405.1;
ORTHOMCL257(20 genes,20 taxa):	NZ_LN824141.1_prot_WP_045087026.1_55;	ABS61368.1;	AFG34207.1;	ACR78775.1;	AEX84603.1;	AFK06912.1;	ABX30869.1;	IX53_00245;	ACJ74896.1;	ABR30045.1;	NC_022792.1_prot_WP_012003514.1_1470;	NC_022795.1_prot_WP_031503716.1_1259;	ABV34038.1;	NC_021214.1_prot_WP_004081486.1_468;	ADA66366.1;	ACM22367.1;	ABQ46464.1;	NZ_AP014510.1_prot_WP_041082593.1_1131;	NC_010483.1_prot_WP_012310550.1_452;	AEH51118.1;
ORTHOMCL258(20 genes,20 taxa):	NZ_LN824141.1_prot_WP_045087744.1_903;	ABS61557.1;	AFG35970.1;	ACR80189.1;	AEX86119.1;	AFK06046.1;	ABX30808.1;	IX53_03390;	ACJ74902.1;	ABR30055.1;	NC_022792.1_prot_WP_012003751.1_1725;	NC_022795.1_prot_WP_031503792.1_1216;	ABV34275.1;	NC_021214.1_prot_WP_004081487.1_467;	ADA66365.1;	ACM22368.1;	ABQ46465.1;	NZ_AP014510.1_prot_WP_041081573.1_454;	NC_010483.1_prot_WP_004081487.1_453;	AEH51908.1;
ORTHOMCL259(20 genes,20 taxa):	NZ_LN824141.1_prot_WP_045087743.1_902;	ABS61558.1;	AFG35971.1;	ACR80190.1;	AEX86118.1;	AFK06047.1;	ABX30807.1;	IX53_03385;	ACJ74901.1;	ABR30054.1;	NC_022792.1_prot_WP_028843753.1_1724;	NC_022795.1_prot_WP_031503791.1_1217;	ABV34274.1;	NC_021214.1_prot_WP_004081488.1_466;	ADA66364.1;	ACM22369.1;	ABQ46466.1;	NZ_AP014510.1_prot_WP_041081575.1_455;	NC_010483.1_prot_WP_012310551.1_454;	AEH51909.1;
ORTHOMCL260(20 genes,20 taxa):	NZ_LN824141.1_prot_WP_045088198.1_1456;	ABS60492.1;	AFG35024.1;	ACR79517.1;	AEX84988.1;	AFK07463.1;	ABX32241.1;	IX53_06260;	ACJ74790.1;	ABR29950.1;	NC_022792.1_prot_WP_012003803.1_1778;	NC_022795.1_prot_WP_031503944.1_1133;	ABV34327.1;	NC_021214.1_prot_WP_008192125.1_463;	ADA66361.1;	ACM22374.1;	ABQ46469.1;	NZ_AP014510.1_prot_WP_041082277.1_915;	NC_010483.1_prot_WP_012310554.1_457;	AEH51870.1;
ORTHOMCL261(20 genes,20 taxa):	NZ_LN824141.1_prot_WP_045088015.1_1238;	ABS60827.1;	AFG35192.1;	ACR79516.1;	AEX85514.1;	AFK08227.1;	ABX32052.1;	IX53_06265;	ACJ74685.1;	ABR31716.1;	NC_022792.1_prot_WP_012003802.1_1777;	NC_022795.1_prot_WP_031503942.1_1134;	ABV34326.1;	NC_021214.1_prot_WP_004081492.1_462;	ADA66360.1;	ACM22375.1;	ABQ46470.1;	NZ_AP014510.1_prot_WP_041082279.1_916;	NC_010483.1_prot_WP_012310555.1_458;	AEH51871.1;
ORTHOMCL262(20 genes,20 taxa):	NZ_LN824141.1_prot_WP_045087089.1_135;	ABS60953.1;	AFG35458.1;	ACR80616.1;	AEX86023.1;	AFK06362.1;	ABX31531.1;	IX53_08570;	ACJ75691.1;	ABR30846.1;	NC_022792.1_prot_WP_012003058.1_990;	NC_022795.1_prot_WP_031503603.1_1327;	ABV33577.1;	NC_021214.1_prot_WP_004081500.1_454;	ADA66353.1;	ACM22383.1;	ABQ46478.1;	NZ_AP014510.1_prot_WP_041082890.1_1312;	NC_010483.1_prot_WP_012310562.1_466;	AEH50684.1;
ORTHOMCL264(20 genes,20 taxa):	NZ_LN824141.1_prot_WP_045087147.1_202;	ABS60950.1;	AFG35455.1;	ACR80614.1;	AEX86027.1;	AFK06364.1;	ABX31460.1;	IX53_08580;	ACJ75695.1;	ABR30850.1;	NC_022792.1_prot_WP_028843208.1_994;	NC_022795.1_prot_WP_031503597.1_1331;	ABV33581.1;	NC_021214.1_prot_WP_010865125.1_451;	ADA66349.1;	ACM22387.1;	ABQ46482.1;	NZ_AP014510.1_prot_WP_041084212.1_1308;	NC_010483.1_prot_WP_012310566.1_469;	AEH50688.1;
ORTHOMCL265(20 genes,20 taxa):	NZ_LN824141.1_prot_WP_045087146.1_201;	ABS60834.1;	AFG35199.1;	ACR80613.1;	AEX85383.1;	AFK06365.1;	ABX31461.1;	IX53_08585;	ACJ76283.1;	ABR31369.1;	NC_022792.1_prot_WP_012003063.1_995;	NC_022795.1_prot_WP_031503595.1_1332;	ABV33582.1;	NC_021214.1_prot_WP_004081505.1_450;	ADA66348.1;	ACM22388.1;	ABQ46483.1;	NZ_AP014510.1_prot_WP_041082883.1_1307;	NC_010483.1_prot_WP_012310567.1_470;	AEH50689.1;
ORTHOMCL266(20 genes,20 taxa):	NZ_LN824141.1_prot_WP_045087273.1_353;	ABS61614.1;	AFG36101.1;	ACR80519.1;	AEX86106.1;	AFK06456.1;	ABX31096.1;	IX53_09075;	ACJ75789.1;	ABR30368.1;	NC_022792.1_prot_WP_012002526.1_462;	NC_022795.1_prot_WP_031503032.1_1701;	ABV33045.1;	NC_021214.1_prot_WP_004081507.1_448;	ADA66346.1;	ACM22390.1;	ABQ46485.1;	NZ_AP014510.1_prot_WP_041081472.1_376;	NC_010483.1_prot_WP_012310569.1_472;	AEH50946.1;
ORTHOMCL267(20 genes,20 taxa):	NZ_LN824141.1_prot_WP_045088539.1_352;	ABS61615.1;	AFG36102.1;	ACR80520.1;	AEX86105.1;	AFK06455.1;	ABX31097.1;	IX53_09070;	ACJ75790.1;	ABR30369.1;	NC_022792.1_prot_WP_012002525.1_461;	NC_022795.1_prot_WP_031503034.1_1700;	ABV33044.1;	NC_021214.1_prot_WP_004081508.1_447;	ADA66345.1;	ACM22391.1;	ABQ46486.1;	NZ_AP014510.1_prot_WP_041081471.1_375;	NC_010483.1_prot_WP_012310570.1_473;	AEH50945.1;
ORTHOMCL268(20 genes,20 taxa):	NZ_LN824141.1_prot_WP_045087272.1_351;	ABS61616.1;	AFG36103.1;	ACR80521.1;	AEX86104.1;	AFK06454.1;	ABX31098.1;	IX53_09065;	ACJ75791.1;	ABR30370.1;	NC_022792.1_prot_WP_012002524.1_460;	NC_022795.1_prot_WP_031503035.1_1699;	ABV33043.1;	NC_021214.1_prot_WP_004081509.1_446;	ADA66344.1;	ACM22392.1;	ABQ46487.1;	NZ_AP014510.1_prot_WP_041081469.1_374;	NC_010483.1_prot_WP_011943105.1_474;	AEH50944.1;
ORTHOMCL269(20 genes,20 taxa):	NZ_LN824141.1_prot_WP_045087271.1_350;	ABS61617.1;	AFG36104.1;	ACR80522.1;	AEX86103.1;	AFK06453.1;	ABX31099.1;	IX53_09060;	ACJ75792.1;	ABR30371.1;	NC_022792.1_prot_WP_028843414.1_459;	NC_022795.1_prot_WP_031503036.1_1698;	ABV33042.1;	NC_021214.1_prot_WP_004081510.1_445;	ADA66343.1;	ACM22393.1;	ABQ46488.1;	NZ_AP014510.1_prot_WP_041081467.1_373;	NC_010483.1_prot_WP_011943106.1_475;	AEH50943.1;
ORTHOMCL270(20 genes,20 taxa):	NZ_LN824141.1_prot_WP_045087270.1_349;	ABS60699.1;	AFG35269.1;	ACR80523.1;	AEX86102.1;	AFK06452.1;	ABX31100.1;	IX53_09055;	ACJ75113.1;	ABR30507.1;	NC_022792.1_prot_WP_012002522.1_458;	NC_022795.1_prot_WP_031503037.1_1697;	ABV33041.1;	NC_021214.1_prot_WP_004081511.1_444;	ADA66342.1;	ACM22394.1;	ABQ46489.1;	NZ_AP014510.1_prot_WP_041081465.1_372;	NC_010483.1_prot_WP_012310571.1_476;	AEH50942.1;
ORTHOMCL271(20 genes,20 taxa):	NZ_LN824141.1_prot_WP_045087269.1_348;	ABS60700.1;	AFG35270.1;	ACR80524.1;	AEX86101.1;	AFK06451.1;	ABX31101.1;	IX53_09050;	ACJ75114.1;	ABR30506.1;	NC_022792.1_prot_WP_012002521.1_457;	NC_022795.1_prot_WP_031503039.1_1696;	ABV33040.1;	NC_021214.1_prot_WP_004081512.1_443;	ADA66341.1;	ACM22395.1;	ABQ46490.1;	NZ_AP014510.1_prot_WP_041081464.1_371;	NC_010483.1_prot_WP_004081512.1_477;	AEH50941.1;
ORTHOMCL272(20 genes,20 taxa):	NZ_LN824141.1_prot_WP_045087268.1_347;	ABS60701.1;	AFG35271.1;	ACR80525.1;	AEX86100.1;	AFK06450.1;	ABX31102.1;	IX53_09045;	ACJ75115.1;	ABR30505.1;	NC_022792.1_prot_WP_012002520.1_456;	NC_022795.1_prot_WP_031503041.1_1695;	ABV33039.1;	NC_021214.1_prot_WP_004081513.1_442;	ADA66340.1;	ACM22396.1;	ABQ46491.1;	NZ_AP014510.1_prot_WP_041084018.1_370;	NC_010483.1_prot_WP_012310572.1_478;	AEH50940.1;
ORTHOMCL273(20 genes,20 taxa):	NZ_LN824141.1_prot_WP_045087267.1_346;	ABS60702.1;	AFG35272.1;	ACR80526.1;	AEX86099.1;	AFK06449.1;	ABX31103.1;	IX53_09040;	ACJ75116.1;	ABR30504.1;	NC_022792.1_prot_WP_012002519.1_455;	NC_022795.1_prot_WP_031503043.1_1694;	ABV33038.1;	NC_021214.1_prot_WP_004081514.1_441;	ADA66339.1;	ACM22397.1;	ABQ46492.1;	NZ_AP014510.1_prot_WP_041081462.1_369;	NC_010483.1_prot_WP_004081514.1_479;	AEH50939.1;
ORTHOMCL274(20 genes,20 taxa):	NZ_LN824141.1_prot_WP_045088465.1_1771;	ABS61183.1;	AFG35811.1;	ACR78757.1;	AEX86332.1;	AFK06250.1;	ABX31945.1;	IX53_00140;	ACJ74708.1;	ABR31741.1;	NC_022792.1_prot_WP_012003667.1_1640;	NC_022795.1_prot_WP_031503396.1_1440;	ABV34191.1;	NC_021214.1_prot_WP_004081517.1_439;	ADA66336.1;	ACM22399.1;	ABQ46495.1;	NZ_AP014510.1_prot_WP_041082726.1_1208;	NC_010483.1_prot_WP_012310573.1_481;	AEH50154.1;
ORTHOMCL275(20 genes,20 taxa):	NZ_LN824141.1_prot_WP_045088464.1_1770;	ABS60659.1;	AFG35118.1;	ACR78751.1;	AEX86338.1;	AFK06256.1;	ABX31944.1;	IX53_00110;	ACJ75623.1;	ABR30777.1;	NC_022792.1_prot_WP_012003661.1_1634;	NC_022795.1_prot_WP_031503383.1_1446;	ABV34185.1;	NC_021214.1_prot_WP_004081518.1_438;	ADA66335.1;	ACM22400.1;	ABQ46496.1;	NZ_AP014510.1_prot_WP_041082717.1_1202;	NC_010483.1_prot_WP_012310574.1_482;	AEH50160.1;
ORTHOMCL276(20 genes,20 taxa):	NZ_LN824141.1_prot_WP_045088607.1_812;	ABS61493.1;	AFG36026.1;	ACR79042.1;	AEX85963.1;	AFK06551.1;	ABX31606.1;	IX53_09920;	ACJ74912.1;	ABR30065.1;	NC_022792.1_prot_WP_012002793.1_726;	NC_022795.1_prot_WP_031502812.1_1827;	ABV33312.1;	NC_021214.1_prot_WP_004083253.1_399;	ADA66306.1;	ACM22436.1;	ABQ46533.1;	NZ_AP014510.1_prot_WP_041083091.1_1438;	NC_010483.1_prot_WP_012310599.1_518;	AEH51013.1;
ORTHOMCL277(20 genes,20 taxa):	NZ_LN824141.1_prot_WP_045087199.1_266;	ABS59916.1;	AFG35236.1;	ACR79043.1;	AEX85965.1;	AFK06552.1;	ABX30947.1;	IX53_09915;	ACJ74603.1;	ABR31608.1;	NC_022792.1_prot_WP_012002795.1_728;	NC_022795.1_prot_WP_031502802.1_1829;	ABV33314.1;	NC_021214.1_prot_WP_004083250.1_397;	ADA66304.1;	ACM22438.1;	ABQ46535.1;	NZ_AP014510.1_prot_WP_041084241.1_1440;	NC_010483.1_prot_WP_012310601.1_520;	AEH51011.1;
ORTHOMCL278(20 genes,20 taxa):	NZ_LN824141.1_prot_WP_045087198.1_265;	ABS59915.1;	AFG35237.1;	ACR79044.1;	AEX85966.1;	AFK06553.1;	ABX30948.1;	IX53_09910;	ACJ74604.1;	ABR31607.1;	NC_022792.1_prot_WP_012002796.1_729;	NC_022795.1_prot_WP_031502800.1_1830;	ABV33315.1;	NC_021214.1_prot_WP_004083247.1_396;	ADA66303.1;	ACM22439.1;	ABQ46536.1;	NZ_AP014510.1_prot_WP_041084243.1_1441;	NC_010483.1_prot_WP_004083247.1_521;	AEH51010.1;
ORTHOMCL279(20 genes,20 taxa):	NZ_LN824141.1_prot_WP_045087197.1_264;	ABS59914.1;	AFG35238.1;	ACR79045.1;	AEX85967.1;	AFK06554.1;	ABX30949.1;	IX53_09905;	ACJ74605.1;	ABR31606.1;	NC_022792.1_prot_WP_028843322.1_730;	NC_022795.1_prot_WP_031502799.1_1831;	ABV33316.1;	NC_021214.1_prot_WP_004083245.1_395;	ADA66302.1;	ACM22440.1;	ABQ46537.1;	NZ_AP014510.1_prot_WP_041083095.1_1442;	NC_010483.1_prot_WP_004083245.1_522;	AEH51009.1;
ORTHOMCL280(20 genes,20 taxa):	NZ_LN824141.1_prot_WP_045087196.1_263;	ABS59913.1;	AFG35239.1;	ACR79046.1;	AEX85968.1;	AFK06555.1;	ABX30950.1;	IX53_09900;	ACJ74606.1;	ABR31605.1;	NC_022792.1_prot_WP_028843321.1_731;	NC_022795.1_prot_WP_031502795.1_1832;	ABV33317.1;	NC_021214.1_prot_WP_004083243.1_394;	ADA66301.1;	ACM22441.1;	ABQ46538.1;	NZ_AP014510.1_prot_WP_041083096.1_1443;	NC_010483.1_prot_WP_004083243.1_523;	AEH51008.1;
ORTHOMCL281(20 genes,20 taxa):	NZ_LN824141.1_prot_WP_045088211.1_1474;	ABS60651.1;	AFG35111.1;	ACR80151.1;	AEX86488.1;	AFK06014.1;	ABX32203.1;	IX53_04030;	ACJ76139.1;	ABR31060.1;	NC_022792.1_prot_WP_012003523.1_1480;	NC_022795.1_prot_WP_038059705.1_1379;	ABV34047.1;	NC_021214.1_prot_WP_004083238.1_391;	ADA66298.1;	ACM22444.1;	ABQ46541.1;	NZ_AP014510.1_prot_WP_041082581.1_1121;	NC_010483.1_prot_WP_012310602.1_526;	AEH50531.1;
ORTHOMCL282(20 genes,20 taxa):	NZ_LN824141.1_prot_WP_045087452.1_563;	ABS60097.1;	AFG34941.1;	ACR80083.1;	AEX84484.1;	AFK06327.1;	ABX31563.1;	IX53_03775;	ACJ74563.1;	ABR30686.1;	NC_022792.1_prot_WP_028843476.1_298;	NC_022795.1_prot_WP_031503827.1_1198;	ABV32880.1;	NC_021214.1_prot_WP_004083198.1_373;	ADA66285.1;	ACM22491.1;	ABQ46554.1;	NZ_AP014510.1_prot_WP_041083554.1_1748;	NC_010483.1_prot_WP_012310611.1_540;	AEH50517.1;
ORTHOMCL283(20 genes,20 taxa):	NZ_LN824141.1_prot_WP_045087342.1_439;	ABS60567.1;	AFG35069.1;	ACR80036.1;	AEX84930.1;	AFK08239.1;	ABX31019.1;	IX53_06685;	ACJ74878.1;	ABR30027.1;	NC_022792.1_prot_WP_012002599.1_534;	NC_022795.1_prot_WP_031504087.1_743;	ABV33118.1;	NC_021214.1_prot_WP_004083211.1_380;	ADA66278.1;	ACM22485.1;	ABQ46560.1;	NZ_AP014510.1_prot_WP_041083367.1_1618;	NC_010483.1_prot_WP_012310616.1_547;	AEH50451.1;
ORTHOMCL284(20 genes,20 taxa):	NZ_LN824141.1_prot_WP_045087341.1_438;	ABS60568.1;	AFG35068.1;	ACR80035.1;	AEX84931.1;	AFK08238.1;	ABX31020.1;	IX53_06680;	ACJ74879.1;	ABR30028.1;	NC_022792.1_prot_WP_012002598.1_533;	NC_022795.1_prot_WP_031504089.1_742;	ABV33117.1;	NC_021214.1_prot_WP_010865109.1_381;	ADA66277.1;	ACM22484.1;	ABQ46561.1;	NZ_AP014510.1_prot_WP_041083369.1_1619;	NC_010483.1_prot_WP_010865109.1_548;	AEH50452.1;
ORTHOMCL285(20 genes,20 taxa):	NZ_LN824141.1_prot_WP_045087614.1_753;	ABS61046.1;	AFG35664.1;	ACR78964.1;	AEX84803.1;	AFK06496.1;	ABX31566.1;	IX53_09590;	ACJ75415.1;	ABR30660.1;	NC_022792.1_prot_WP_028843803.1_1598;	NC_022795.1_prot_WP_031502899.1_1774;	ABV34149.1;	NC_021214.1_prot_WP_004083189.1_368;	ADA66275.1;	ACM22482.1;	ABQ46563.1;	NZ_AP014510.1_prot_WP_041082229.1_887;	NC_010483.1_prot_WP_008193527.1_550;	AEH51281.1;
ORTHOMCL286(20 genes,20 taxa):	NZ_LN824141.1_prot_WP_045088195.1_1452;	ABS59969.1;	AFG34481.1;	ACR79594.1;	AEX85841.1;	AFK07706.1;	ABX32244.1;	IX53_05240;	ACJ75876.1;	ABR30982.1;	NC_022792.1_prot_WP_012002069.1_15;	NC_022795.1_prot_WP_031505514.1_336;	ABV32588.1;	NC_021214.1_prot_WP_004083188.1_367;	ADA66274.1;	ACM22481.1;	ABQ46564.1;	NZ_AP014510.1_prot_WP_041083779.1_1970;	NC_010483.1_prot_WP_004083188.1_551;	AEH50122.1;
ORTHOMCL287(20 genes,20 taxa):	NZ_LN824141.1_prot_WP_045088018.1_1241;	ABS61056.1;	AFG35625.1;	ACR79595.1;	AEX84903.1;	AFK07707.1;	ABX32343.1;	IX53_05235;	ACJ75877.1;	ABR30983.1;	NC_022792.1_prot_WP_028843597.1_14;	NC_022795.1_prot_WP_031505515.1_335;	ABV32587.1;	NC_021214.1_prot_WP_004083187.1_366;	ADA66273.1;	ACM22480.1;	ABQ46565.1;	NZ_AP014510.1_prot_WP_041083777.1_1969;	NC_010483.1_prot_WP_004083187.1_552;	AEH50121.1;
ORTHOMCL288(20 genes,20 taxa):	NZ_LN824141.1_prot_WP_045088716.1_1537;	ABS60264.1;	AFG34349.1;	ACR80829.1;	AEX85448.1;	AFK06957.1;	ABX32092.1;	IX53_10275;	ACJ75076.1;	ABR30305.1;	NC_022792.1_prot_WP_038051807.1_1497;	NC_022795.1_prot_WP_031505080.1_949;	ABV34064.1;	NC_021214.1_prot_WP_004083173.1_359;	ADA66265.1;	ACM22472.1;	ABQ46573.1;	NZ_AP014510.1_prot_WP_041082999.1_1372;	NC_010483.1_prot_WP_011943175.1_560;	AEH51632.1;
ORTHOMCL289(20 genes,20 taxa):	NZ_LN824141.1_prot_WP_045087143.1_197;	ABS60135.1;	AFG34899.1;	ACR80828.1;	AEX85622.1;	AFK06956.1;	ABX31465.1;	IX53_10270;	ACJ76289.1;	ABR31375.1;	NC_022792.1_prot_WP_028843510.1_234;	NC_022795.1_prot_WP_031505495.1_348;	ABV32818.1;	NC_021214.1_prot_WP_004083171.1_358;	ADA66264.1;	ACM22471.1;	ABQ46574.1;	NZ_AP014510.1_prot_WP_041083499.1_1710;	NC_010483.1_prot_WP_012310620.1_561;	AEH50318.1;
ORTHOMCL290(20 genes,20 taxa):	NZ_LN824141.1_prot_WP_045087643.1_785;	ABS60354.1;	AFG34939.1;	ACR80278.1;	AEX85385.1;	AFK06121.1;	ABX31581.1;	IX53_03185;	ACJ74652.1;	ABR31683.1;	NC_022792.1_prot_WP_012003820.1_1794;	NC_022795.1_prot_WP_031503978.1_1117;	ABV34344.1;	NC_021214.1_prot_WP_004083167.1_356;	ADA66262.1;	ACM22469.1;	ABQ46576.1;	NZ_AP014510.1_prot_WP_041082246.1_898;	NC_010483.1_prot_WP_012310622.1_563;	AEH51863.1;
ORTHOMCL291(20 genes,20 taxa):	NZ_LN824141.1_prot_WP_045087566.1_696;	ABS59987.1;	AFG34498.1;	ACR79521.1;	AEX84987.1;	AFK08223.1;	ABX32405.1;	IX53_06240;	ACJ75221.1;	ABR30240.1;	NC_022792.1_prot_WP_012002862.1_795;	NC_022795.1_prot_WP_031502871.1_1790;	ABV33381.1;	NC_021214.1_prot_WP_004083106.1_332;	ADA67063.1;	ACM22507.1;	ABQ46601.1;	NZ_AP014510.1_prot_WP_041083186.1_1506;	NC_010483.1_prot_WP_011943199.1_589;	AEH50742.1;
ORTHOMCL294(20 genes,20 taxa):	NZ_LN824141.1_prot_WP_045087368.1_469;	ABS60614.1;	AFG34627.1;	ACR80341.1;	AEX85824.1;	AFK06155.1;	ABX31377.1;	IX53_02875;	ACJ76051.1;	ABR31121.1;	NC_022792.1_prot_WP_012003921.1_1896;	NC_022795.1_prot_WP_031503433.1_1420;	ABV34445.1;	NC_021214.1_prot_WP_004082977.1_267;	ADA66994.1;	ACM22588.1;	ABQ46671.1;	NZ_AP014510.1_prot_WP_041082754.1_1227;	NC_010483.1_prot_WP_012310676.1_668;	AEH50137.1;
ORTHOMCL295(20 genes,20 taxa):	NZ_LN824141.1_prot_WP_045087302.1_390;	ABS60462.1;	AFG34997.1;	ACR80429.1;	AEX85261.1;	AFK06202.1;	ABX31059.1;	IX53_02495;	ACJ74886.1;	ABR30035.1;	NC_022792.1_prot_WP_012003445.1_1402;	NC_022795.1_prot_WP_031504800.1_78;	ABV33969.1;	NC_021214.1_prot_WP_004082976.1_266;	ADA66993.1;	ACM22589.1;	ABQ46672.1;	NZ_AP014510.1_prot_WP_041082861.1_1294;	NC_010483.1_prot_WP_012310677.1_669;	AEH51971.1;
ORTHOMCL296(20 genes,20 taxa):	NZ_LN824141.1_prot_WP_045088248.1_1515;	ABS60240.1;	AFG34325.1;	ACR80833.1;	AEX85936.1;	AFK06962.1;	ABX32112.1;	IX53_10295;	ACJ76115.1;	ABR31185.1;	NC_022792.1_prot_WP_012003442.1_1399;	NC_022795.1_prot_WP_031504804.1_81;	ABV33966.1;	NC_021214.1_prot_WP_004082971.1_261;	ADA66988.1;	ACM22595.1;	ABQ46677.1;	NZ_AP014510.1_prot_WP_041082856.1_1291;	NC_010483.1_prot_WP_012310682.1_674;	AEH51968.1;
ORTHOMCL297(20 genes,20 taxa):	NZ_LN824141.1_prot_WP_045087956.1_1166;	ABS60063.1;	AFG34744.1;	ACR79054.1;	AEX86370.1;	AFK07017.1;	ABX32543.1;	IX53_09860;	ACJ74542.1;	ABR31575.1;	NC_022792.1_prot_WP_012002612.1_547;	NC_022795.1_prot_WP_031503268.1_1572;	ABV33131.1;	NC_021214.1_prot_WP_004082969.1_259;	ADA66986.1;	ACM22597.1;	ABQ46679.1;	NZ_AP014510.1_prot_WP_041084290.1_1603;	NC_010483.1_prot_WP_012310683.1_676;	AEH50837.1;
ORTHOMCL298(20 genes,20 taxa):	NZ_LN824141.1_prot_WP_045088700.1_1444;	ABS61494.1;	AFG36025.1;	ACR80089.1;	AEX86376.1;	AFK07157.1;	ABX32252.1;	IX53_03745;	ACJ75404.1;	ABR30685.1;	NC_022792.1_prot_WP_028843341.1_671;	NC_022795.1_prot_WP_031504151.1_706;	ABV33256.1;	NC_021214.1_prot_WP_004082967.1_257;	ADA66984.1;	ACM22599.1;	ABQ46681.1;	NZ_AP014510.1_prot_WP_041081956.1_712;	NC_010483.1_prot_WP_012310685.1_678;	AEH51131.1;
ORTHOMCL299(20 genes,20 taxa):	NZ_LN824141.1_prot_WP_045087598.1_731;	ABS61050.1;	AFG35667.1;	ACR80549.1;	AEX84467.1;	AFK06428.1;	ABX31889.1;	IX53_08905;	ACJ75813.1;	ABR30402.1;	NC_022792.1_prot_WP_012002534.1_470;	NC_022795.1_prot_WP_031503026.1_1706;	ABV33053.1;	NC_021214.1_prot_WP_004082966.1_256;	ADA66983.1;	ACM22600.1;	ABQ46682.1;	NZ_AP014510.1_prot_WP_041081482.1_384;	NC_010483.1_prot_WP_012310686.1_679;	AEH50951.1;
ORTHOMCL300(20 genes,20 taxa):	NZ_LN824141.1_prot_WP_045087179.1_241;	ABS61431.1;	AFG35863.1;	ACR80345.1;	AEX85474.1;	AFK06151.1;	ABX32337.1;	IX53_02855;	ACJ75254.1;	ABR30353.1;	NC_022792.1_prot_WP_028843675.1_1861;	NC_022795.1_prot_WP_031502915.1_1765;	ABV34412.1;	NC_021214.1_prot_WP_010865083.1_253;	ADA66980.1;	ACM22603.1;	ABQ46685.1;	NZ_AP014510.1_prot_WP_041083603.1_1811;	NC_010483.1_prot_WP_010865083.1_682;	AEH51814.1;
ORTHOMCL301(20 genes,20 taxa):	NZ_LN824141.1_prot_WP_045088522.1_242;	ABS60876.1;	AFG35348.1;	ACR80346.1;	AEX85473.1;	AFK06150.1;	ABX32338.1;	IX53_02850;	ACJ75749.1;	ABR30885.1;	NC_022792.1_prot_WP_028843537.1_179;	NC_022795.1_prot_WP_031502913.1_1766;	ABV32765.1;	NC_021214.1_prot_WP_004082962.1_252;	ADA66979.1;	ACM22604.1;	ABQ46686.1;	NZ_AP014510.1_prot_WP_041081072.1_52;	NC_010483.1_prot_WP_004082962.1_683;	AEH50341.1;
ORTHOMCL302(20 genes,20 taxa):	NZ_LN824141.1_prot_WP_045088523.1_243;	ABS60875.1;	AFG35349.1;	ACR80347.1;	AEX85472.1;	AFK06149.1;	ABX32339.1;	IX53_02845;	ACJ75750.1;	ABR30886.1;	NC_022792.1_prot_WP_012002248.1_181;	NC_022795.1_prot_WP_031502909.1_1768;	ABV32767.1;	NC_021214.1_prot_WP_008193805.1_251;	ADA66978.1;	ACM22605.1;	ABQ46687.1;	NZ_AP014510.1_prot_WP_041081070.1_50;	NC_010483.1_prot_WP_008193805.1_684;	AEH50343.1;
ORTHOMCL303(20 genes,20 taxa):	NZ_LN824141.1_prot_WP_045088385.1_1683;	ABS60873.1;	AFG35352.1;	ACR80349.1;	AEX86200.1;	AFK06147.1;	ABX32522.1;	IX53_02835;	ACJ75752.1;	ABR30888.1;	NC_022792.1_prot_WP_012003688.1_1662;	NC_022795.1_prot_WP_031504979.1_210;	ABV34212.1;	NC_021214.1_prot_WP_015646089.1_249;	ADA66976.1;	ACM22607.1;	ABQ46689.1;	NZ_AP014510.1_prot_WP_041083692.1_1909;	NC_010483.1_prot_WP_010865082.1_686;	AEH50430.1;
ORTHOMCL304(20 genes,20 taxa):	NZ_LN824141.1_prot_WP_045087263.1_342;	ABS61351.1;	AFG34224.1;	ACR80415.1;	AEX86128.1;	AFK08273.1;	ABX31108.1;	IX53_02570;	ACJ74969.1;	ABR30118.1;	NC_022792.1_prot_WP_012002713.1_647;	NC_022795.1_prot_WP_031504108.1_730;	ABV33232.1;	NC_021214.1_prot_WP_011943280.1_248;	ADA66975.1;	ACM22608.1;	ABQ46690.1;	NZ_AP014510.1_prot_WP_041081795.1_611;	NC_010483.1_prot_WP_011943280.1_687;	AEH51150.1;
ORTHOMCL305(20 genes,20 taxa):	NZ_LN824141.1_prot_WP_045087413.1_522;	ABS61353.1;	AFG34222.1;	ACR80601.1;	AEX84535.1;	AFK06377.1;	ABX31428.1;	IX53_08650;	ACJ74970.1;	ABR30119.1;	NC_022792.1_prot_WP_012002715.1_649;	NC_022795.1_prot_WP_031504112.1_728;	ABV33234.1;	NC_021214.1_prot_WP_004082956.1_246;	ADA66973.1;	ACM22610.1;	ABQ46692.1;	NZ_AP014510.1_prot_WP_041081799.1_613;	NC_010483.1_prot_WP_004082956.1_689;	AEH51148.1;
ORTHOMCL306(20 genes,20 taxa):	NZ_LN824141.1_prot_WP_045087169.1_227;	ABS61415.1;	AFG35880.1;	ACR80342.1;	AEX85836.1;	AFK06154.1;	ABX32022.1;	IX53_02870;	ACJ76247.1;	ABR31453.1;	NC_022792.1_prot_WP_028843491.1_278;	NC_022795.1_prot_WP_031504493.1_522;	ABV32862.1;	NC_021214.1_prot_WP_004082954.1_244;	ADA66971.1;	ACM22612.1;	ABQ46694.1;	NZ_AP014510.1_prot_WP_041083406.1_1647;	NC_010483.1_prot_WP_004082954.1_691;	AEH51346.1;
ORTHOMCL307(20 genes,20 taxa):	NZ_LN824141.1_prot_WP_045088596.1_746;	ABS61416.1;	AFG35879.1;	ACR79617.1;	AEX84959.1;	AFK07036.1;	ABX31691.1;	IX53_05115;	ACJ76246.1;	ABR31452.1;	NC_022792.1_prot_WP_012002342.1_277;	NC_022795.1_prot_WP_031504495.1_521;	ABV32861.1;	NC_021214.1_prot_WP_004082953.1_243;	ADA66970.1;	ACM22613.1;	ABQ46695.1;	NZ_AP014510.1_prot_WP_041083408.1_1648;	NC_010483.1_prot_WP_004082953.1_692;	AEH51347.1;
ORTHOMCL308(20 genes,20 taxa):	NZ_LN824141.1_prot_WP_045087507.1_632;	ABS60256.1;	AFG34341.1;	ACR79616.1;	AEX84958.1;	AFK07035.1;	ABX31348.1;	IX53_05120;	ACJ76333.1;	ABR31419.1;	NC_022792.1_prot_WP_012002341.1_276;	NC_022795.1_prot_WP_031504496.1_520;	ABV32860.1;	NC_021214.1_prot_WP_004082952.1_242;	ADA66969.1;	ACM22614.1;	ABQ46696.1;	NZ_AP014510.1_prot_WP_041083410.1_1649;	NC_010483.1_prot_WP_004082952.1_693;	AEH51348.1;
ORTHOMCL309(20 genes,20 taxa):	NZ_LN824141.1_prot_WP_045088584.1_631;	ABS60255.1;	AFG34340.1;	ACR79615.1;	AEX84957.1;	AFK07034.1;	ABX31347.1;	IX53_05125;	ACJ76332.1;	ABR31418.1;	NC_022792.1_prot_WP_012002340.1_275;	NC_022795.1_prot_WP_031504498.1_519;	ABV32859.1;	NC_021214.1_prot_WP_004082951.1_241;	ADA66968.1;	ACM22615.1;	ABQ46697.1;	NZ_AP014510.1_prot_WP_041083411.1_1650;	NC_010483.1_prot_WP_004082951.1_694;	AEH51349.1;
ORTHOMCL310(20 genes,20 taxa):	NZ_LN824141.1_prot_WP_045088583.1_630;	ABS60254.1;	AFG34339.1;	ACR79614.1;	AEX84956.1;	AFK07033.1;	ABX31346.1;	IX53_05130;	ACJ76331.1;	ABR31417.1;	NC_022792.1_prot_WP_012002339.1_274;	NC_022795.1_prot_WP_031504501.1_518;	ABV32858.1;	NC_021214.1_prot_WP_004082950.1_240;	ADA66967.1;	ACM22616.1;	ABQ46698.1;	NZ_AP014510.1_prot_WP_041083413.1_1651;	NC_010483.1_prot_WP_004082950.1_695;	AEH51350.1;
ORTHOMCL311(20 genes,20 taxa):	NZ_LN824141.1_prot_WP_045087506.1_629;	ABS60253.1;	AFG34338.1;	ACR79613.1;	AEX84955.1;	AFK07032.1;	ABX31345.1;	IX53_05135;	ACJ76330.1;	ABR31416.1;	NC_022792.1_prot_WP_012002338.1_273;	NC_022795.1_prot_WP_031504502.1_517;	ABV32857.1;	NC_021214.1_prot_WP_004082949.1_239;	ADA66966.1;	ACM22617.1;	ABQ46699.1;	NZ_AP014510.1_prot_WP_041083415.1_1652;	NC_010483.1_prot_WP_004082949.1_696;	AEH51351.1;
ORTHOMCL312(20 genes,20 taxa):	NZ_LN824141.1_prot_WP_045088582.1_628;	ABS60252.1;	AFG34337.1;	ACR79612.1;	AEX84954.1;	AFK07031.1;	ABX31344.1;	IX53_05140;	ACJ76329.1;	ABR31415.1;	NC_022792.1_prot_WP_012002337.1_272;	NC_022795.1_prot_WP_031504503.1_516;	ABV32856.1;	NC_021214.1_prot_WP_004082948.1_238;	ADA66965.1;	ACM22618.1;	ABQ46700.1;	NZ_AP014510.1_prot_WP_041084308.1_1653;	NC_010483.1_prot_WP_012310689.1_697;	AEH51352.1;
ORTHOMCL313(20 genes,20 taxa):	NZ_LN824141.1_prot_WP_045087221.1_293;	ABS61349.1;	AFG34226.1;	ACR79608.1;	AEX84949.1;	AFK07027.1;	ABX31631.1;	IX53_05165;	ACJ74967.1;	ABR30116.1;	NC_022792.1_prot_WP_028843492.1_267;	NC_022795.1_prot_WP_031504508.1_511;	ABV32851.1;	NC_021214.1_prot_WP_004082940.1_233;	ADA66961.1;	ACM22623.1;	ABQ46705.1;	NZ_AP014510.1_prot_WP_041083424.1_1658;	NC_010483.1_prot_WP_012310694.1_702;	AEH51357.1;
ORTHOMCL314(20 genes,20 taxa):	NZ_LN824141.1_prot_WP_045088483.1_15;	ABS60310.1;	AFG34647.1;	ACR80076.1;	AEX85614.1;	AFK07167.1;	ABX32511.1;	IX53_03810;	ACJ75358.1;	ABR30527.1;	NC_022792.1_prot_WP_028843715.1_1787;	NC_022795.1_prot_WP_031503964.1_1124;	ABV34337.1;	NC_021214.1_prot_WP_004082936.1_231;	ADA66959.1;	ACM22625.1;	ABQ46707.1;	NZ_AP014510.1_prot_WP_041082259.1_905;	NC_010483.1_prot_WP_012310695.1_704;	AEH51856.1;
ORTHOMCL315(20 genes,20 taxa):	NZ_LN824141.1_prot_WP_045086993.1_17;	ABS60308.1;	AFG34649.1;	ACR80074.1;	AEX85616.1;	AFK07169.1;	ABX32509.1;	IX53_03820;	ACJ75360.1;	ABR30529.1;	NC_022792.1_prot_WP_038051491.1_1789;	NC_022795.1_prot_WP_031503966.1_1122;	ABV34339.1;	NC_021214.1_prot_WP_004082932.1_229;	ADA66957.1;	ACM22627.1;	ABQ46709.1;	NZ_AP014510.1_prot_WP_041082255.1_903;	NC_010483.1_prot_WP_012310697.1_706;	AEH51858.1;
ORTHOMCL316(20 genes,20 taxa):	NZ_LN824141.1_prot_WP_045086994.1_18;	ABS61563.1;	AFG35976.1;	ACR80073.1;	AEX85548.1;	AFK07170.1;	ABX32508.1;	IX53_03825;	ACJ74959.1;	ABR30108.1;	NC_022792.1_prot_WP_028843365.1_618;	NC_022795.1_prot_WP_031503146.1_1638;	ABV33203.1;	NC_021214.1_prot_WP_004082930.1_228;	ADA66956.1;	ACM22628.1;	ABQ46710.1;	NZ_AP014510.1_prot_WP_041083233.1_1535;	NC_010483.1_prot_WP_012310698.1_707;	AEH50774.1;
ORTHOMCL317(20 genes,20 taxa):	NZ_LN824141.1_prot_WP_045086995.1_19;	ABS61070.1;	AFG35944.1;	ACR80072.1;	AEX85547.1;	AFK07171.1;	ABX32347.1;	IX53_03830;	ACJ75629.1;	ABR30804.1;	NC_022792.1_prot_WP_028843364.1_619;	NC_022795.1_prot_WP_031503145.1_1639;	ABV33204.1;	NC_021214.1_prot_WP_004082928.1_227;	ADA66955.1;	ACM22629.1;	ABQ46711.1;	NZ_AP014510.1_prot_WP_041083230.1_1534;	NC_010483.1_prot_WP_012310699.1_708;	AEH50773.1;
ORTHOMCL318(20 genes,20 taxa):	NZ_LN824141.1_prot_WP_045086996.1_20;	ABS61069.1;	AFG35945.1;	ACR80071.1;	AEX85546.1;	AFK07172.1;	ABX32346.1;	IX53_03835;	ACJ75601.1;	ABR30752.1;	NC_022792.1_prot_WP_028843363.1_620;	NC_022795.1_prot_WP_031503143.1_1640;	ABV33205.1;	NC_021214.1_prot_WP_004082926.1_226;	ADA66954.1;	ACM22630.1;	ABQ46712.1;	NZ_AP014510.1_prot_WP_041083228.1_1533;	NC_010483.1_prot_WP_012310700.1_709;	AEH50772.1;
ORTHOMCL319(20 genes,20 taxa):	NZ_LN824141.1_prot_WP_045086997.1_21;	ABS61068.1;	AFG35946.1;	ACR80070.1;	AEX85545.1;	AFK07173.1;	ABX32345.1;	IX53_03840;	ACJ75600.1;	ABR30751.1;	NC_022792.1_prot_WP_028843362.1_621;	NC_022795.1_prot_WP_031503141.1_1641;	ABV33206.1;	NC_021214.1_prot_WP_004082924.1_225;	ADA66953.1;	ACM22631.1;	ABQ46713.1;	NZ_AP014510.1_prot_WP_041083227.1_1532;	NC_010483.1_prot_WP_012310701.1_710;	AEH50771.1;
ORTHOMCL320(20 genes,20 taxa):	NZ_LN824141.1_prot_WP_045087683.1_835;	ABS60334.1;	AFG34660.1;	ACR80812.1;	AEX85128.1;	AFK06779.1;	ABX31859.1;	IX53_01795;	ACJ75852.1;	ABR30442.1;	NC_022792.1_prot_WP_012002819.1_752;	NC_022795.1_prot_WP_038059555.1_1852;	ABV33338.1;	NC_021214.1_prot_WP_004082914.1_220;	ADA66948.1;	ACM22636.1;	ABQ46718.1;	NZ_AP014510.1_prot_WP_041083120.1_1463;	NC_010483.1_prot_WP_011943302.1_715;	AEH50700.1;
ORTHOMCL321(20 genes,20 taxa):	NZ_LN824141.1_prot_WP_045088281.1_1557;	ABS61142.1;	AFG35703.1;	ACR80412.1;	AEX85491.1;	AFK06078.1;	ABX32073.1;	IX53_04595;	ACJ76244.1;	ABR31450.1;	NC_022792.1_prot_WP_012002554.1_490;	NC_022795.1_prot_WP_031502987.1_1727;	ABV33073.1;	NC_021214.1_prot_WP_004082910.1_218;	ADA66946.1;	ACM22638.1;	ABQ46720.1;	NZ_AP014510.1_prot_WP_041084363.1_1790;	NC_010483.1_prot_WP_011943304.1_717;	AEH50969.1;
ORTHOMCL322(20 genes,20 taxa):	NZ_LN824141.1_prot_WP_045087525.1_651;	ABS60903.1;	AFG35298.1;	ACR80785.1;	AEX85784.1;	AFK06589.1;	ABX31811.1;	IX53_01535;	ACJ75123.1;	ABR30496.1;	NC_022792.1_prot_WP_012002515.1_452;	NC_022795.1_prot_WP_031503051.1_1690;	ABV33034.1;	NC_021214.1_prot_WP_004082897.1_211;	ADA66939.1;	ACM22644.1;	ABQ46727.1;	NZ_AP014510.1_prot_WP_041081459.1_366;	NC_010483.1_prot_WP_012310708.1_723;	AEH50935.1;
ORTHOMCL323(20 genes,20 taxa):	NZ_LN824141.1_prot_WP_045087524.1_650;	ABS60902.1;	AFG35299.1;	ACR80786.1;	AEX85783.1;	AFK06590.1;	ABX31810.1;	IX53_01530;	ACJ75122.1;	ABR30497.1;	NC_022792.1_prot_WP_012002516.1_453;	NC_022795.1_prot_WP_031503049.1_1691;	ABV33035.1;	NC_021214.1_prot_WP_004082894.1_210;	ADA66938.1;	ACM22645.1;	ABQ46728.1;	NZ_AP014510.1_prot_WP_041081460.1_367;	NC_010483.1_prot_WP_012310709.1_724;	AEH50936.1;
ORTHOMCL324(20 genes,20 taxa):	NZ_LN824141.1_prot_WP_045088068.1_1300;	ABS60824.1;	AFG35189.1;	ACR80309.1;	AEX84596.1;	AFK07842.1;	ABX32601.1;	IX53_04585;	ACJ74688.1;	ABR31720.1;	NC_022792.1_prot_WP_012003986.1_1959;	NC_022795.1_prot_WP_031504045.1_1080;	ABV34510.1;	NC_021214.1_prot_WP_004082890.1_208;	ADA66936.1;	ACM22647.1;	ABQ46730.1;	NZ_AP014510.1_prot_WP_041081147.1_151;	NC_010483.1_prot_WP_012310711.1_726;	AEH51927.1;
ORTHOMCL325(20 genes,20 taxa):	NZ_LN824141.1_prot_WP_045088067.1_1299;	ABS60825.1;	AFG35190.1;	ACR80310.1;	AEX84597.1;	AFK07843.1;	ABX32600.1;	IX53_04580;	ACJ74687.1;	ABR31719.1;	NC_022792.1_prot_WP_012003987.1_1960;	NC_022795.1_prot_WP_031504047.1_1079;	ABV34511.1;	NC_021214.1_prot_WP_004082888.1_207;	ADA66935.1;	ACM22648.1;	ABQ46731.1;	NZ_AP014510.1_prot_WP_041081148.1_152;	NC_010483.1_prot_WP_012310712.1_727;	AEH51926.1;
ORTHOMCL326(20 genes,20 taxa):	NZ_LN824141.1_prot_WP_045087304.1_392;	ABS60870.1;	AFG35355.1;	ACR80311.1;	AEX84598.1;	AFK07844.1;	ABX30988.1;	IX53_04575;	ACJ74544.1;	ABR31577.1;	NC_022792.1_prot_WP_012003988.1_1961;	NC_022795.1_prot_WP_031504049.1_1078;	ABV34512.1;	NC_021214.1_prot_WP_004082886.1_206;	ADA66934.1;	ACM22649.1;	ABQ46732.1;	NZ_AP014510.1_prot_WP_041081149.1_153;	NC_010483.1_prot_WP_012310713.1_728;	AEH51925.1;
ORTHOMCL327(20 genes,20 taxa):	NZ_LN824141.1_prot_WP_045088677.1_1298;	ABS60826.1;	AFG35191.1;	ACR80312.1;	AEX84599.1;	AFK07845.1;	ABX32599.1;	IX53_04570;	ACJ74686.1;	ABR31718.1;	NC_022792.1_prot_WP_012003989.1_1962;	NC_022795.1_prot_WP_031504052.1_1077;	ABV34513.1;	NC_021214.1_prot_WP_004082884.1_205;	ADA66933.1;	ACM22650.1;	ABQ46733.1;	NZ_AP014510.1_prot_WP_041081150.1_154;	NC_010483.1_prot_WP_012310714.1_729;	AEH51924.1;
ORTHOMCL328(20 genes,20 taxa):	NZ_LN824141.1_prot_WP_045088678.1_1302;	ABS61496.1;	AFG36023.1;	ACR80314.1;	AEX84601.1;	AFK07847.1;	ABX32603.1;	IX53_04560;	ACJ76233.1;	ABR31439.1;	NC_022792.1_prot_WP_012003991.1_1964;	NC_022795.1_prot_WP_031504055.1_1075;	ABV34515.1;	NC_021214.1_prot_WP_004082880.1_203;	ADA66931.1;	ACM22652.1;	ABQ46735.1;	NZ_AP014510.1_prot_WP_041081151.1_156;	NC_010483.1_prot_WP_012310715.1_731;	AEH51922.1;
ORTHOMCL329(20 genes,20 taxa):	NZ_LN824141.1_prot_WP_045088280.1_1556;	ABS61606.1;	AFG36093.1;	ACR78733.1;	AEX85492.1;	AFK06273.1;	ABX32074.1;	IX53_00020;	ACJ76319.1;	ABR31405.1;	NC_022792.1_prot_WP_012002066.1_12;	NC_022795.1_prot_WP_031505519.1_333;	ABV32585.1;	NC_021214.1_prot_WP_004082875.1_200;	ADA66928.1;	ACM22655.1;	ABQ46738.1;	NZ_AP014510.1_prot_WP_041083773.1_1967;	NC_010483.1_prot_WP_012310718.1_734;	AEH50119.1;
ORTHOMCL330(20 genes,20 taxa):	NZ_LN824141.1_prot_WP_045088404.1_1705;	ABS60869.1;	AFG35357.1;	ACR78735.1;	AEX84646.1;	AFK06270.1;	ABX30942.1;	IX53_00030;	ACJ74752.1;	ABR29913.1;	NC_022792.1_prot_WP_038051428.1_11;	NC_022795.1_prot_WP_031505521.1_332;	ABV32584.1;	NC_021214.1_prot_WP_008193905.1_199;	ADA66927.1;	ACM22657.1;	ABQ46739.1;	NZ_AP014510.1_prot_WP_041083771.1_1966;	NC_010483.1_prot_WP_012310719.1_735;	AEH50117.1;
ORTHOMCL331(20 genes,20 taxa):	NZ_LN824141.1_prot_WP_045087264.1_343;	ABS59954.1;	AFG34466.1;	ACR80721.1;	AEX86129.1;	AFK05786.1;	ABX31107.1;	IX53_02470;	ACJ74659.1;	ABR31691.1;	NC_022792.1_prot_WP_012002838.1_771;	NC_022795.1_prot_WP_031502721.1_1870;	ABV33357.1;	NC_021214.1_prot_WP_004082863.1_194;	ADA66922.1;	ACM22662.1;	ABQ46744.1;	NZ_AP014510.1_prot_WP_041083152.1_1482;	NC_010483.1_prot_WP_012310724.1_740;	AEH50718.1;
ORTHOMCL332(20 genes,20 taxa):	NZ_LN824141.1_prot_WP_045087265.1_344;	ABS60228.1;	AFG34565.1;	ACR80720.1;	AEX86130.1;	AFK05785.1;	ABX31106.1;	IX53_02465;	ACJ74740.1;	ABR29903.1;	NC_022792.1_prot_WP_012002837.1_770;	NC_022795.1_prot_WP_031502723.1_1869;	ABV33356.1;	NC_021214.1_prot_WP_004082860.1_193;	ADA66921.1;	ACM22663.1;	ABQ46745.1;	NZ_AP014510.1_prot_WP_041083151.1_1481;	NC_010483.1_prot_WP_012310725.1_741;	AEH50717.1;
ORTHOMCL333(20 genes,20 taxa):	NZ_LN824141.1_prot_WP_045087703.1_859;	ABS60749.1;	AFG35508.1;	ACR78776.1;	AEX86391.1;	AFK06911.1;	ABX30779.1;	IX53_00250;	ACJ76171.1;	ABR31266.1;	NC_022792.1_prot_WP_012002590.1_525;	NC_022795.1_prot_WP_031504307.1_622;	ABV33109.1;	NC_021214.1_prot_WP_004082821.1_179;	ADA66909.1;	ACM22679.1;	ABQ46759.1;	NZ_AP014510.1_prot_WP_041083380.1_1627;	NC_010483.1_prot_WP_041434300.1_756;	AEH50460.1;
ORTHOMCL334(20 genes,20 taxa):	NZ_LN824141.1_prot_WP_045087650.1_795;	ABS60525.1;	AFG34384.1;	ACR80589.1;	AEX86384.1;	AFK06388.1;	ABX31591.1;	IX53_08710;	ACJ75898.1;	ABR31006.1;	NC_022792.1_prot_WP_038051315.1_527;	NC_022795.1_prot_WP_031504312.1_620;	ABV33111.1;	NC_021214.1_prot_WP_004082816.1_176;	ADA66906.1;	ACM22682.1;	ABQ46762.1;	NZ_AP014510.1_prot_WP_041083376.1_1625;	NC_010483.1_prot_WP_012310740.1_759;	AEH50457.1;
ORTHOMCL335(20 genes,20 taxa):	NZ_LN824141.1_prot_WP_045088321.1_1607;	ABS61422.1;	AFG35874.1;	ACR80235.1;	AEX85175.1;	AFK05951.1;	ABX32133.1;	IX53_04305;	ACJ75005.1;	ABR30148.1;	NC_022792.1_prot_WP_012002498.1_435;	NC_022795.1_prot_WP_031503078.1_1674;	ABV33017.1;	NC_021214.1_prot_WP_004082813.1_173;	ADA66902.1;	ACM22685.1;	ABQ46766.1;	NZ_AP014510.1_prot_WP_041081430.1_349;	NC_010483.1_prot_WP_011943343.1_762;	AEH50919.1;
ORTHOMCL336(20 genes,20 taxa):	NZ_LN824141.1_prot_WP_045087937.1_1143;	ABS60098.1;	AFG34437.1;	ACR78962.1;	AEX84891.1;	AFK06494.1;	ABX30893.1;	IX53_09580;	ACJ76141.1;	ABR31236.1;	NC_022792.1_prot_WP_038051533.1_1600;	NC_022795.1_prot_WP_038059618.1_1776;	ABV34151.1;	NC_021214.1_prot_WP_004082803.1_166;	ADA66895.1;	ACM22692.1;	ABQ46773.1;	NZ_AP014510.1_prot_WP_041082225.1_885;	NC_010483.1_prot_WP_012310748.1_769;	AEH51279.1;
ORTHOMCL337(20 genes,20 taxa):	NZ_LN824141.1_prot_WP_045087936.1_1142;	ABS59999.1;	AFG34511.1;	ACR78961.1;	AEX84890.1;	AFK06493.1;	ABX30894.1;	IX53_09575;	ACJ74593.1;	ABR31618.1;	NC_022792.1_prot_WP_028843800.1_1601;	NC_022795.1_prot_WP_031502895.1_1777;	ABV34152.1;	NC_021214.1_prot_WP_004082801.1_165;	ADA66894.1;	ACM22693.1;	ABQ46774.1;	NZ_AP014510.1_prot_WP_041082224.1_884;	NC_010483.1_prot_WP_004082801.1_770;	AEH51278.1;
ORTHOMCL338(20 genes,20 taxa):	NZ_LN824141.1_prot_WP_045088541.1_363;	ABS60288.1;	AFG34967.1;	ACR80248.1;	AEX84808.1;	AFK06094.1;	ABX31085.1;	IX53_03035;	ACJ76134.1;	ABR31063.1;	NC_022792.1_prot_WP_012002381.1_319;	NC_022795.1_prot_WP_031503865.1_1176;	ABV32900.1;	NC_021214.1_prot_WP_004082798.1_164;	ADA66893.1;	ACM22694.1;	ABQ46775.1;	NZ_AP014510.1_prot_WP_041081364.1_302;	NC_010483.1_prot_WP_012310749.1_771;	AEH50273.1;
ORTHOMCL339(20 genes,20 taxa):	NZ_LN824141.1_prot_WP_045087281.1_362;	ABS61365.1;	AFG34210.1;	ACR78899.1;	AEX84807.1;	AFK07628.1;	ABX31086.1;	IX53_02185;	ACJ74982.1;	ABR30130.1;	NC_022792.1_prot_WP_028843684.1_1850;	NC_022795.1_prot_WP_031504714.1_18;	ABV34401.1;	NC_021214.1_prot_WP_004082796.1_163;	ADA66892.1;	ACM22695.1;	ABQ46776.1;	NZ_AP014510.1_prot_WP_041083594.1_1801;	NC_010483.1_prot_WP_012310750.1_772;	AEH51824.1;
ORTHOMCL340(20 genes,20 taxa):	NZ_LN824141.1_prot_WP_045088335.1_1624;	ABS60209.1;	AFG34875.1;	ACR80422.1;	AEX86153.1;	AFK06690.1;	ABX32159.1;	IX53_02535;	ACJ76326.1;	ABR31412.1;	NC_022792.1_prot_WP_012004014.1_1987;	NC_022795.1_prot_WP_031502252.1_1054;	ABV34538.1;	NC_021214.1_prot_WP_015646086.1_161;	ADA66890.1;	ACM22697.1;	ABQ46778.1;	NZ_AP014510.1_prot_WP_041081175.1_179;	NC_010483.1_prot_WP_011943354.1_774;	AEH52003.1;
ORTHOMCL341(20 genes,20 taxa):	NZ_LN824141.1_prot_WP_045088336.1_1625;	ABS60654.1;	AFG35113.1;	ACR80421.1;	AEX86154.1;	AFK06689.1;	ABX32158.1;	IX53_02540;	ACJ75618.1;	ABR30772.1;	NC_022792.1_prot_WP_028843615.1_1988;	NC_022795.1_prot_WP_031502251.1_1053;	ABV34539.1;	NC_021214.1_prot_WP_004082791.1_160;	ADA66889.1;	ACM22698.1;	ABQ46779.1;	NZ_AP014510.1_prot_WP_041083989.1_180;	NC_010483.1_prot_WP_012310753.1_775;	AEH52004.1;
ORTHOMCL342(20 genes,20 taxa):	NZ_LN824141.1_prot_WP_045088452.1_1757;	ABS60878.1;	AFG35346.1;	ACR80176.1;	AEX86213.1;	AFK06038.1;	ABX32332.1;	IX53_03885;	ACJ76165.1;	ABR30508.1;	NC_022792.1_prot_WP_038051283.1_840;	NC_022795.1_prot_WP_031502926.1_1759;	ABV33425.1;	NC_021214.1_prot_WP_010865064.1_159;	ADA66888.1;	ACM22699.1;	ABQ46780.1;	NZ_AP014510.1_prot_WP_041083023.1_1387;	NC_010483.1_prot_WP_012310754.1_776;	AEH51207.1;
ORTHOMCL343(20 genes,20 taxa):	NZ_LN824141.1_prot_WP_045088747.1_1712;	ABS60181.1;	AFG34363.1;	ACR80133.1;	AEX86253.1;	AFK05998.1;	ABX30934.1;	IX53_04125;	ACJ75949.1;	ABR31210.1;	NC_022792.1_prot_WP_028843465.1_312;	NC_022795.1_prot_WP_031504737.1_34;	ABV32893.1;	NC_021214.1_prot_WP_004082783.1_156;	ADA66885.1;	ACM22702.1;	ABQ46783.1;	NZ_AP014510.1_prot_WP_041081375.1_309;	NC_010483.1_prot_WP_012310757.1_779;	AEH51790.1;
ORTHOMCL344(20 genes,20 taxa):	NZ_LN824141.1_prot_WP_045088411.1_1713;	ABS60779.1;	AFG35391.1;	ACR80134.1;	AEX86252.1;	AFK05999.1;	ABX30933.1;	IX53_04120;	ACJ74857.1;	ABR30005.1;	NC_022792.1_prot_WP_012002375.1_313;	NC_022795.1_prot_WP_031504738.1_35;	ABV32894.1;	NC_021214.1_prot_WP_004082781.1_155;	ADA66884.1;	ACM22703.1;	ABQ46784.1;	NZ_AP014510.1_prot_WP_041081374.1_308;	NC_010483.1_prot_WP_004082781.1_780;	AEH51791.1;
ORTHOMCL345(20 genes,20 taxa):	NZ_LN824141.1_prot_WP_045088676.1_1295;	ABS61369.1;	AFG34206.1;	ACR80621.1;	AEX85221.1;	AFK06358.1;	ABX32596.1;	IX53_08545;	ACJ74908.1;	ABR30061.1;	NC_022792.1_prot_WP_012003886.1_1859;	NC_022795.1_prot_WP_031504713.1_17;	ABV34410.1;	NC_021214.1_prot_WP_004082779.1_154;	ADA66883.1;	ACM22704.1;	ABQ46785.1;	NZ_AP014510.1_prot_WP_041083595.1_1802;	NC_010483.1_prot_WP_004082779.1_781;	AEH51823.1;
ORTHOMCL346(20 genes,20 taxa):	NZ_LN824141.1_prot_WP_045088405.1_1706;	ABS60759.1;	AFG35411.1;	ACR80620.1;	AEX86256.1;	AFK06359.1;	ABX30941.1;	IX53_08550;	ACJ76160.1;	ABR31255.1;	NC_022792.1_prot_WP_038051228.1_441;	NC_022795.1_prot_WP_031503067.1_1680;	ABV33023.1;	NC_021214.1_prot_WP_004082778.1_153;	ADA66882.1;	ACM22705.1;	ABQ46786.1;	NZ_AP014510.1_prot_WP_041081440.1_355;	NC_010483.1_prot_WP_011943360.1_782;	AEH50925.1;
ORTHOMCL347(20 genes,20 taxa):	NZ_LN824141.1_prot_WP_045088744.1_1694;	ABS60688.1;	AFG35156.1;	ACR80224.1;	AEX86028.1;	AFK05973.1;	ABX32532.1;	IX53_04250;	ACJ75266.1;	ABR30341.1;	NC_022792.1_prot_WP_028843657.1_1901;	NC_022795.1_prot_WP_031503423.1_1425;	ABV34450.1;	NC_021214.1_prot_WP_004082764.1_146;	ADA66875.1;	ACM22713.1;	ABQ46793.1;	NZ_AP014510.1_prot_WP_041082746.1_1222;	NC_010483.1_prot_WP_012310761.1_789;	AEH50142.1;
ORTHOMCL348(20 genes,20 taxa):	NZ_LN824141.1_prot_WP_045088396.1_1695;	ABS60689.1;	AFG35157.1;	ACR80225.1;	AEX86029.1;	AFK05972.1;	ABX32533.1;	IX53_04255;	ACJ75267.1;	ABR30340.1;	NC_022792.1_prot_WP_012003925.1_1900;	NC_022795.1_prot_WP_031503425.1_1424;	ABV34449.1;	NC_021214.1_prot_WP_004082761.1_145;	ADA66874.1;	ACM22714.1;	ABQ46794.1;	NZ_AP014510.1_prot_WP_041082748.1_1223;	NC_010483.1_prot_WP_004082761.1_790;	AEH50141.1;
ORTHOMCL349(20 genes,20 taxa):	NZ_LN824141.1_prot_WP_045088745.1_1696;	ABS60690.1;	AFG35158.1;	ACR80226.1;	AEX86030.1;	AFK05971.1;	ABX32534.1;	IX53_04260;	ACJ75268.1;	ABR30339.1;	NC_022792.1_prot_WP_012003924.1_1899;	NC_022795.1_prot_WP_031503427.1_1423;	ABV34448.1;	NC_021214.1_prot_WP_004082759.1_144;	ADA66873.1;	ACM22715.1;	ABQ46795.1;	NZ_AP014510.1_prot_WP_041082750.1_1224;	NC_010483.1_prot_WP_012310762.1_791;	AEH50140.1;
ORTHOMCL350(20 genes,20 taxa):	NZ_LN824141.1_prot_WP_045088746.1_1697;	ABS60210.1;	AFG34876.1;	ACR80228.1;	AEX86032.1;	AFK05969.1;	ABX32536.1;	IX53_04270;	ACJ76325.1;	ABR31411.1;	NC_022792.1_prot_WP_038051707.1_1897;	NC_022795.1_prot_WP_031503431.1_1421;	ABV34446.1;	NC_021214.1_prot_WP_004082754.1_142;	ADA66871.1;	ACM22717.1;	ABQ46797.1;	NZ_AP014510.1_prot_WP_041084176.1_1226;	NC_010483.1_prot_WP_004082754.1_793;	AEH50138.1;
ORTHOMCL351(20 genes,20 taxa):	NZ_LN824141.1_prot_WP_045088222.1_1485;	ABS60692.1;	AFG35160.1;	ACR78975.1;	AEX84657.1;	AFK06507.1;	ABX32182.1;	IX53_09645;	ACJ75129.1;	ABR30490.1;	NC_022792.1_prot_WP_012002594.1_529;	NC_022795.1_prot_WP_031504316.1_618;	ABV33113.1;	NC_021214.1_prot_WP_004082752.1_141;	ADA66870.1;	ACM22718.1;	ABQ46798.1;	NZ_AP014510.1_prot_WP_041083372.1_1623;	NC_010483.1_prot_WP_011943366.1_794;	AEH50455.1;
ORTHOMCL352(20 genes,20 taxa):	NZ_LN824141.1_prot_WP_045088223.1_1486;	ABS60693.1;	AFG35161.1;	ACR78976.1;	AEX84658.1;	AFK06508.1;	ABX32181.1;	IX53_09650;	ACJ75128.1;	ABR30491.1;	NC_022792.1_prot_WP_012002595.1_530;	NC_022795.1_prot_WP_031504318.1_617;	ABV33114.1;	NC_021214.1_prot_WP_004082750.1_140;	ADA66869.1;	ACM22719.1;	ABQ46799.1;	NZ_AP014510.1_prot_WP_041084296.1_1622;	NC_010483.1_prot_WP_011943367.1_795;	AEH50454.1;
ORTHOMCL353(20 genes,20 taxa):	NZ_LN824141.1_prot_WP_045087418.1_527;	ABS59901.1;	AFG35247.1;	ACR78977.1;	AEX86120.1;	AFK06509.1;	ABX31433.1;	IX53_09655;	ACJ75070.1;	ABR30149.1;	NC_022792.1_prot_WP_012002230.1_167;	NC_022795.1_prot_WP_031505180.1_292;	ABV32749.1;	NC_021214.1_prot_WP_004082747.1_139;	ADA66868.1;	ACM22720.1;	ABQ46800.1;	NZ_AP014510.1_prot_WP_041081075.1_57;	NC_010483.1_prot_WP_011943368.1_796;	AEH50398.1;
ORTHOMCL354(20 genes,20 taxa):	NZ_LN824141.1_prot_WP_045088664.1_1219;	ABS61588.1;	AFG36075.1;	ACR80088.1;	AEX85375.1;	AFK07158.1;	ABX32142.1;	IX53_03750;	ACJ74666.1;	ABR31698.1;	NC_022792.1_prot_WP_028843500.1_252;	NC_022795.1_prot_WP_031504415.1_563;	ABV32836.1;	NC_021214.1_prot_WP_004082715.1_124;	ADA66853.1;	ACM22737.1;	ABQ46815.1;	NZ_AP014510.1_prot_WP_041083836.1_2007;	NC_010483.1_prot_WP_012310767.1_811;	AEH51404.1;
ORTHOMCL355(20 genes,20 taxa):	NZ_LN824141.1_prot_WP_045088366.1_1662;	ABS60711.1;	AFG35281.1;	ACR78873.1;	AEX86482.1;	AFK07585.1;	ABX31709.1;	IX53_08465;	ACJ75196.1;	ABR30302.1;	NC_022792.1_prot_WP_012003670.1_1643;	NC_022795.1_prot_WP_031503400.1_1437;	ABV34194.1;	NC_021214.1_prot_WP_004082709.1_121;	ADA66850.1;	ACM22740.1;	ABQ46818.1;	NZ_AP014510.1_prot_WP_041084132.1_1095;	NC_010483.1_prot_WP_011943386.1_814;	AEH51587.1;
ORTHOMCL356(20 genes,20 taxa):	NZ_LN824141.1_prot_WP_045088365.1_1661;	ABS60712.1;	AFG35282.1;	ACR78874.1;	AEX86481.1;	AFK07584.1;	ABX31710.1;	IX53_08470;	ACJ75195.1;	ABR30301.1;	NC_022792.1_prot_WP_012003671.1_1644;	NC_022795.1_prot_WP_031503401.1_1436;	ABV34195.1;	NC_021214.1_prot_WP_004082707.1_120;	ADA66849.1;	ACM22741.1;	ABQ46819.1;	NZ_AP014510.1_prot_WP_041082537.1_1096;	NC_010483.1_prot_WP_011943387.1_815;	AEH51588.1;
ORTHOMCL357(20 genes,20 taxa):	NZ_LN824141.1_prot_WP_045088097.1_1334;	ABS61536.1;	AFG35986.1;	ACR80457.1;	AEX84546.1;	AFK08020.1;	ABX32636.1;	IX53_02045;	ACJ75891.1;	ABR30998.1;	NC_022792.1_prot_WP_038051771.1_1622;	NC_022795.1_prot_WP_031503363.1_1457;	ABV34173.1;	NC_021214.1_prot_WP_004082677.1_105;	ADA66834.1;	ACM22758.1;	ABQ46834.1;	NZ_AP014510.1_prot_WP_041081855.1_651;	NC_010483.1_prot_WP_011943402.1_830;	AEH51523.1;
ORTHOMCL358(20 genes,20 taxa):	NZ_LN824141.1_prot_WP_045088617.1_899;	ABS61338.1;	AFG34237.1;	ACR80456.1;	AEX84496.1;	AFK08019.1;	ABX30804.1;	IX53_02050;	ACJ76064.1;	ABR31134.1;	NC_022792.1_prot_WP_012003650.1_1623;	NC_022795.1_prot_WP_031503366.1_1456;	ABV34174.1;	NC_021214.1_prot_WP_004082675.1_104;	ADA66833.1;	ACM22759.1;	ABQ46835.1;	NZ_AP014510.1_prot_WP_041081853.1_650;	NC_010483.1_prot_WP_011943403.1_831;	AEH51522.1;
ORTHOMCL359(20 genes,20 taxa):	NZ_LN824141.1_prot_WP_045087976.1_1187;	ABS59880.1;	AFG34170.1;	ACR80241.1;	AEX85133.1;	AFK06088.1;	ABX32371.1;	IX53_03065;	ACJ74735.1;	ABR29899.1;	NC_022792.1_prot_WP_012003093.1_1026;	NC_022795.1_prot_WP_031503554.1_1355;	ABV33612.1;	NC_021214.1_prot_WP_004082669.1_101;	ADA66830.1;	ACM22762.1;	ABQ46838.1;	NZ_AP014510.1_prot_WP_041082427.1_1023;	NC_010483.1_prot_WP_008194051.1_834;	AEH51298.1;
ORTHOMCL360(20 genes,20 taxa):	NZ_LN824141.1_prot_WP_045088657.1_1188;	ABS59879.1;	AFG34169.1;	ACR80242.1;	AEX85134.1;	AFK06089.1;	ABX32372.1;	IX53_03060;	ACJ74734.1;	ABR29898.1;	NC_022792.1_prot_WP_012003092.1_1025;	NC_022795.1_prot_WP_031503556.1_1354;	ABV33611.1;	NC_021214.1_prot_WP_004082660.1_100;	ADA66829.1;	ACM22763.1;	ABQ46839.1;	NZ_AP014510.1_prot_WP_041082425.1_1022;	NC_010483.1_prot_WP_011943406.1_835;	AEH51297.1;
ORTHOMCL361(20 genes,20 taxa):	NZ_LN824141.1_prot_WP_045088658.1_1189;	ABS59878.1;	AFG34168.1;	ACR80243.1;	AEX85135.1;	AFK06090.1;	ABX32373.1;	IX53_03055;	ACJ74733.1;	ABR29897.1;	NC_022792.1_prot_WP_012003091.1_1024;	NC_022795.1_prot_WP_031503557.1_1353;	ABV33610.1;	NC_021214.1_prot_WP_010865052.1_99;	ADA66828.1;	ACM22764.1;	ABQ46840.1;	NZ_AP014510.1_prot_WP_041082423.1_1021;	NC_010483.1_prot_WP_011943407.1_836;	AEH51296.1;
ORTHOMCL362(20 genes,20 taxa):	NZ_LN824141.1_prot_WP_045087978.1_1191;	ABS59876.1;	AFG34166.1;	ACR80246.1;	AEX85137.1;	AFK06092.1;	ABX32375.1;	IX53_03045;	ACJ74731.1;	ABR29895.1;	NC_022792.1_prot_WP_028843205.1_1022;	NC_022795.1_prot_WP_031503561.1_1351;	ABV33608.1;	NC_021214.1_prot_WP_004082649.1_97;	ADA66826.1;	ACM22766.1;	ABQ46842.1;	NZ_AP014510.1_prot_WP_041082419.1_1019;	NC_010483.1_prot_WP_012310776.1_838;	AEH51294.1;
ORTHOMCL363(20 genes,20 taxa):	NZ_LN824141.1_prot_WP_045088373.1_1669;	ABS60049.1;	AFG34734.1;	ACR80534.1;	AEX84683.1;	AFK06442.1;	ABX31718.1;	IX53_08995;	ACJ76203.1;	ABR31356.1;	NC_022792.1_prot_WP_028843339.1_689;	NC_022795.1_prot_WP_031502690.1_1887;	ABV33275.1;	NC_021214.1_prot_WP_004082648.1_96;	ADA66825.1;	ACM22767.1;	ABQ46843.1;	NZ_AP014510.1_prot_WP_041081988.1_730;	NC_010483.1_prot_WP_011943410.1_839;	AEH50992.1;
ORTHOMCL364(20 genes,20 taxa):	NZ_LN824141.1_prot_WP_045087408.1_515;	ABS60231.1;	AFG34315.1;	ACR80799.1;	AEX84697.1;	AFK06603.1;	ABX31748.1;	IX53_01465;	ACJ75222.1;	ABR30241.1;	NC_022792.1_prot_WP_028843429.1_381;	NC_022795.1_prot_WP_031504869.1_125;	ABV32962.1;	NC_021214.1_prot_WP_004082646.1_94;	ADA66823.1;	ACM22769.1;	ABQ46845.1;	NZ_AP014510.1_prot_WP_041084304.1_1631;	NC_010483.1_prot_WP_012310777.1_841;	AEH51709.1;
ORTHOMCL365(20 genes,20 taxa):	NZ_LN824141.1_prot_WP_045087407.1_514;	ABS60232.1;	AFG34316.1;	ACR80800.1;	AEX84698.1;	AFK06604.1;	ABX31749.1;	IX53_01460;	ACJ75223.1;	ABR30242.1;	NC_022792.1_prot_WP_038051335.1_382;	NC_022795.1_prot_WP_038059823.1_126;	ABV32963.1;	NC_021214.1_prot_WP_010865050.1_93;	ADA66822.1;	ACM22770.1;	ABQ46846.1;	NZ_AP014510.1_prot_WP_041083381.1_1632;	NC_010483.1_prot_WP_038033216.1_842;	AEH51708.1;
ORTHOMCL366(20 genes,20 taxa):	NZ_LN824141.1_prot_WP_045088199.1_1457;	ABS60233.1;	AFG34317.1;	ACR80801.1;	AEX84659.1;	AFK06605.1;	ABX32229.1;	IX53_01455;	ACJ75224.1;	ABR30243.1;	NC_022792.1_prot_WP_012002445.1_383;	NC_022795.1_prot_WP_038059824.1_127;	ABV32964.1;	NC_021214.1_prot_WP_004082642.1_92;	ADA66821.1;	ACM22771.1;	ABQ46847.1;	NZ_AP014510.1_prot_WP_041083383.1_1633;	NC_010483.1_prot_WP_011943414.1_843;	AEH51707.1;
ORTHOMCL367(20 genes,20 taxa):	NZ_LN824141.1_prot_WP_045087515.1_641;	ABS61118.1;	AFG35728.1;	ACR80547.1;	AEX85774.1;	AFK06430.1;	ABX31357.1;	IX53_08915;	ACJ74557.1;	ABR31588.1;	NC_022792.1_prot_WP_012002552.1_488;	NC_022795.1_prot_WP_031502991.1_1725;	ABV33071.1;	NC_021214.1_prot_WP_004082638.1_90;	ADA66819.1;	ACM22774.1;	ABQ46849.1;	NZ_AP014510.1_prot_WP_041081504.1_402;	NC_010483.1_prot_WP_011943416.1_845;	AEH50967.1;
ORTHOMCL368(20 genes,20 taxa):	NZ_LN824141.1_prot_WP_045087521.1_647;	ABS61111.1;	AFG35735.1;	ACR80541.1;	AEX85780.1;	AFK06437.1;	ABX31807.1;	IX53_08960;	ACJ74550.1;	ABR31581.1;	NC_022792.1_prot_WP_012002545.1_481;	NC_022795.1_prot_WP_031503003.1_1718;	ABV33064.1;	NC_021214.1_prot_WP_004082616.1_83;	ADA66812.1;	ACM22781.1;	ABQ46856.1;	NZ_AP014510.1_prot_WP_041081493.1_395;	NC_010483.1_prot_WP_012310781.1_852;	AEH50960.1;
ORTHOMCL369(20 genes,20 taxa):	NZ_LN824141.1_prot_WP_045088479.1_1789;	ABS61141.1;	AFG35704.1;	ACR80689.1;	AEX84711.1;	AFK06488.1;	ABX32475.1;	IX53_09555;	ACJ76245.1;	ABR31451.1;	NC_022792.1_prot_WP_012002544.1_480;	NC_022795.1_prot_WP_031503006.1_1717;	ABV33063.1;	NC_021214.1_prot_WP_004082614.1_82;	ADA66811.1;	ACM22782.1;	ABQ46857.1;	NZ_AP014510.1_prot_WP_041081492.1_394;	NC_010483.1_prot_WP_012310782.1_853;	AEH50959.1;
ORTHOMCL370(20 genes,20 taxa):	NZ_LN824141.1_prot_WP_045087710.1_867;	ABS60123.1;	AFG34911.1;	ACR80292.1;	AEX85417.1;	AFK07828.1;	ABX30787.1;	IX53_03150;	ACJ74756.1;	ABR29917.1;	NC_022792.1_prot_WP_012003309.1_1273;	NC_022795.1_prot_WP_031503570.1_1346;	ABV33833.1;	NC_021214.1_prot_WP_010865044.1_76;	ADA66805.1;	ACM22788.1;	ABQ46863.1;	NZ_AP014510.1_prot_WP_041084110.1_1014;	NC_010483.1_prot_WP_041434307.1_859;	AEH51067.1;
ORTHOMCL371(20 genes,20 taxa):	NZ_LN824141.1_prot_WP_045087711.1_868;	ABS60122.1;	AFG34912.1;	ACR80291.1;	AEX85416.1;	AFK07827.1;	ABX30788.1;	IX53_03155;	ACJ74757.1;	ABR29918.1;	NC_022792.1_prot_WP_028843957.1_1272;	NC_022795.1_prot_WP_031503568.1_1347;	ABV33832.1;	NC_021214.1_prot_WP_004082603.1_75;	ADA66804.1;	ACM22789.1;	ABQ46864.1;	NZ_AP014510.1_prot_WP_041084111.1_1015;	NC_010483.1_prot_WP_012310788.1_860;	AEH51068.1;
ORTHOMCL372(20 genes,20 taxa):	NZ_LN824141.1_prot_WP_045087712.1_869;	ABS60938.1;	AFG35445.1;	ACR80290.1;	AEX85415.1;	AFK07826.1;	ABX30789.1;	IX53_03160;	ACJ76088.1;	ABR31159.1;	NC_022792.1_prot_WP_028843958.1_1271;	NC_022795.1_prot_WP_031503566.1_1348;	ABV33831.1;	NC_021214.1_prot_WP_004082601.1_74;	ADA66803.1;	ACM22790.1;	ABQ46865.1;	NZ_AP014510.1_prot_WP_041082413.1_1016;	NC_010483.1_prot_WP_011943432.1_861;	AEH51069.1;
ORTHOMCL373(20 genes,20 taxa):	NZ_LN824141.1_prot_WP_045087611.1_749;	ABS60125.1;	AFG34909.1;	ACR79095.1;	AEX84640.1;	AFK07135.1;	ABX31688.1;	IX53_07160;	ACJ74546.1;	ABR31578.1;	NC_022792.1_prot_WP_012002610.1_545;	NC_022795.1_prot_WP_031503272.1_1570;	ABV33129.1;	NC_021214.1_prot_WP_004082534.1_47;	ADA66776.1;	ACM22819.1;	ABQ46892.1;	NZ_AP014510.1_prot_WP_041083344.1_1605;	NC_010483.1_prot_WP_012310809.1_887;	AEH50839.1;
ORTHOMCL374(20 genes,20 taxa):	NZ_LN824141.1_prot_WP_045087497.1_618;	ABS61546.1;	AFG35959.1;	ACR80293.1;	AEX85321.1;	AFK07829.1;	ABX31333.1;	IX53_03145;	ACJ75466.1;	ABR30631.1;	NC_022792.1_prot_WP_028843333.1_708;	NC_022795.1_prot_WP_031502658.1_1903;	ABV33294.1;	NC_021214.1_prot_WP_010865029.1_18;	ADA66749.1;	ACM22851.1;	ABQ46919.1;	NZ_AP014510.1_prot_WP_041082018.1_749;	NC_010483.1_prot_WP_012310825.1_915;	AEH50756.1;
ORTHOMCL375(20 genes,20 taxa):	NZ_LN824141.1_prot_WP_045087153.1_208;	ABS60845.1;	AFG35222.1;	ACR78906.1;	AEX86277.1;	AFK06191.1;	ABX31450.1;	IX53_02685;	ACJ75997.1;	ABR31026.1;	NC_022792.1_prot_WP_012003554.1_1511;	NC_022795.1_prot_WP_031505094.1_935;	ABV34078.1;	NC_021214.1_prot_WP_004082449.1_8;	ADA66739.1;	ACM22862.1;	ABQ46929.1;	NZ_AP014510.1_prot_WP_041082972.1_1358;	NC_010483.1_prot_WP_004082449.1_925;	AEH51618.1;
ORTHOMCL376(20 genes,20 taxa):	NZ_LN824141.1_prot_WP_045087154.1_209;	ABS60844.1;	AFG35221.1;	ACR78907.1;	AEX86276.1;	AFK06190.1;	ABX31449.1;	IX53_02690;	ACJ75996.1;	ABR31025.1;	NC_022792.1_prot_WP_012003553.1_1510;	NC_022795.1_prot_WP_031505093.1_936;	ABV34077.1;	NC_021214.1_prot_WP_004082448.1_7;	ADA66738.1;	ACM22863.1;	ABQ46930.1;	NZ_AP014510.1_prot_WP_041082974.1_1359;	NC_010483.1_prot_WP_004082448.1_926;	AEH51619.1;
ORTHOMCL377(20 genes,20 taxa):	NZ_LN824141.1_prot_WP_045087491.1_611;	ABS60630.1;	AFG35090.1;	ACR80631.1;	AEX84706.1;	AFK07519.1;	ABX31326.1;	IX53_09450;	ACJ76001.1;	ABR31030.1;	NC_022792.1_prot_WP_012003501.1_1457;	NC_022795.1_prot_WP_038059857.1_932;	ABV34025.1;	NC_021214.1_prot_WP_004082426.1_1871;	ADA66728.1;	ACM22986.1;	ABQ46940.1;	NZ_AP014510.1_prot_WP_041081905.1_681;	NC_010483.1_prot_WP_012310833.1_936;	AEH50193.1;
ORTHOMCL378(20 genes,20 taxa):	NZ_LN824141.1_prot_WP_045087445.1_555;	ABS60539.1;	AFG34610.1;	ACR80274.1;	AEX85189.1;	AFK06118.1;	ABX31265.1;	IX53_03165;	ACJ76112.1;	ABR31182.1;	NC_022792.1_prot_WP_012002198.1_135;	NC_022795.1_prot_WP_031505159.1_313;	ABV32717.1;	NC_021214.1_prot_WP_004082424.1_1869;	ADA66726.1;	ACM22984.1;	ABQ46942.1;	NZ_AP014510.1_prot_WP_041081313.1_266;	NC_010483.1_prot_WP_012310834.1_938;	AEH50365.1;
ORTHOMCL379(20 genes,20 taxa):	NZ_LN824141.1_prot_WP_045087349.1_447;	ABS59881.1;	AFG34171.1;	ACR80210.1;	AEX84994.1;	AFK06065.1;	ABX31006.1;	IX53_03305;	ACJ75192.1;	ABR30298.1;	NC_022792.1_prot_WP_028843547.1_136;	NC_022795.1_prot_WP_031505160.1_312;	ABV32718.1;	NC_021214.1_prot_WP_004082423.1_1868;	ADA66725.1;	ACM22983.1;	ABQ46943.1;	NZ_AP014510.1_prot_WP_041081315.1_267;	NC_010483.1_prot_WP_012310835.1_939;	AEH50366.1;
ORTHOMCL380(20 genes,20 taxa):	NZ_LN824141.1_prot_WP_045087351.1_449;	ABS61596.1;	AFG36083.1;	ACR80212.1;	AEX84992.1;	AFK06067.1;	ABX31004.1;	IX53_03295;	ACJ76309.1;	ABR31395.1;	NC_022792.1_prot_WP_012002201.1_138;	NC_022795.1_prot_WP_031505162.1_310;	ABV32720.1;	NC_021214.1_prot_WP_004082421.1_1866;	ADA66723.1;	ACM22980.1;	ABQ46945.1;	NZ_AP014510.1_prot_WP_041081319.1_269;	NC_010483.1_prot_WP_004082421.1_941;	AEH50368.1;
ORTHOMCL381(20 genes,20 taxa):	NZ_LN824141.1_prot_WP_045087915.1_1116;	ABS59944.1;	AFG34457.1;	ACR80628.1;	AEX85531.1;	AFK07522.1;	ABX31191.1;	IX53_09465;	ACJ74639.1;	ABR31671.1;	NC_022792.1_prot_WP_012002722.1_656;	NC_022795.1_prot_WP_031504123.1_721;	ABV33241.1;	NC_021214.1_prot_WP_004082419.1_1864;	ADA66721.1;	ACM22979.1;	ABQ46947.1;	NZ_AP014510.1_prot_WP_041081809.1_620;	NC_010483.1_prot_WP_012310837.1_943;	AEH51141.1;
ORTHOMCL382(20 genes,20 taxa):	NZ_LN824141.1_prot_WP_045087219.1_290;	ABS61607.1;	AFG36094.1;	ACR80270.1;	AEX84943.1;	AFK06116.1;	ABX31628.1;	IX53_02920;	ACJ76320.1;	ABR31406.1;	NC_022792.1_prot_WP_028843411.1_475;	NC_022795.1_prot_WP_031503015.1_1712;	ABV33058.1;	NC_021214.1_prot_WP_015646203.1_1862;	ADA66719.1;	ACM22978.1;	ABQ46949.1;	NZ_AP014510.1_prot_WP_041081486.1_389;	NC_010483.1_prot_WP_041434311.1_945;	AEH50954.1;
ORTHOMCL383(20 genes,20 taxa):	NZ_LN824141.1_prot_WP_045087599.1_733;	ABS60215.1;	AFG34883.1;	ACR80550.1;	AEX84465.1;	AFK06427.1;	ABX31891.1;	IX53_08900;	ACJ76321.1;	ABR31407.1;	NC_022792.1_prot_WP_012002540.1_476;	NC_022795.1_prot_WP_031503013.1_1713;	ABV33059.1;	NC_021214.1_prot_WP_004082416.1_1861;	ADA66718.1;	ACM22976.1;	ABQ46950.1;	NZ_AP014510.1_prot_WP_041081487.1_390;	NC_010483.1_prot_WP_012310840.1_946;	AEH50955.1;
ORTHOMCL384(20 genes,20 taxa):	NZ_LN824141.1_prot_WP_045087459.1_572;	ABS61134.1;	AFG35711.1;	ACR80250.1;	AEX84652.1;	AFK06096.1;	ABX31281.1;	IX53_03025;	ACJ75901.1;	ABR31009.1;	NC_022792.1_prot_WP_012004074.1_2046;	NC_022795.1_prot_WP_031504677.1_2064;	ABV34598.1;	NC_021214.1_prot_WP_004082414.1_1859;	ADA66716.1;	ACM22974.1;	ABQ46952.1;	NZ_AP014510.1_prot_WP_041083923.1_2067;	NC_010483.1_prot_WP_008194281.1_948;	AEH52046.1;
ORTHOMCL385(20 genes,20 taxa):	NZ_LN824141.1_prot_WP_045087033.1_63;	ABS61135.1;	AFG35710.1;	ACR80251.1;	AEX85768.1;	AFK06097.1;	ABX30827.1;	IX53_03020;	ACJ75902.1;	ABR31010.1;	NC_022792.1_prot_WP_012004073.1_2045;	NC_022795.1_prot_WP_031504676.1_2063;	ABV34597.1;	NC_021214.1_prot_WP_004082413.1_1858;	ADA66715.1;	ACM22973.1;	ABQ46953.1;	NZ_AP014510.1_prot_WP_041083921.1_2066;	NC_010483.1_prot_WP_012310842.1_949;	AEH52045.1;
ORTHOMCL386(20 genes,20 taxa):	NZ_LN824141.1_prot_WP_045087034.1_64;	ABS61136.1;	AFG35709.1;	ACR80252.1;	AEX85767.1;	AFK06098.1;	ABX30828.1;	IX53_03015;	ACJ75903.1;	ABR31011.1;	NC_022792.1_prot_WP_012004072.1_2044;	NC_022795.1_prot_WP_031504675.1_2062;	ABV34596.1;	NC_021214.1_prot_WP_004082412.1_1857;	ADA66714.1;	ACM22972.1;	ABQ46954.1;	NZ_AP014510.1_prot_WP_041083919.1_2065;	NC_010483.1_prot_WP_012310843.1_950;	AEH52044.1;
ORTHOMCL387(20 genes,20 taxa):	NZ_LN824141.1_prot_WP_045087035.1_65;	ABS61137.1;	AFG35708.1;	ACR80253.1;	AEX85766.1;	AFK06099.1;	ABX30829.1;	IX53_03010;	ACJ75904.1;	ABR31012.1;	NC_022792.1_prot_WP_012004071.1_2043;	NC_022795.1_prot_WP_031504673.1_2061;	ABV34595.1;	NC_021214.1_prot_WP_004082411.1_1856;	ADA66713.1;	ACM22971.1;	ABQ46955.1;	NZ_AP014510.1_prot_WP_041083916.1_2064;	NC_010483.1_prot_WP_004082411.1_951;	AEH52043.1;
ORTHOMCL388(20 genes,20 taxa):	NZ_LN824141.1_prot_WP_045087036.1_66;	ABS61138.1;	AFG35707.1;	ACR80254.1;	AEX85765.1;	AFK06100.1;	ABX30830.1;	IX53_03005;	ACJ75905.1;	ABR31013.1;	NC_022792.1_prot_WP_012004070.1_2042;	NC_022795.1_prot_WP_031504672.1_2060;	ABV34594.1;	NC_021214.1_prot_WP_004082410.1_1855;	ADA66712.1;	ACM22970.1;	ABQ46956.1;	NZ_AP014510.1_prot_WP_041083914.1_2063;	NC_010483.1_prot_WP_012310844.1_952;	AEH52042.1;
ORTHOMCL389(20 genes,20 taxa):	NZ_LN824141.1_prot_WP_045088490.1_67;	ABS61139.1;	AFG35706.1;	ACR80255.1;	AEX85764.1;	AFK06101.1;	ABX30831.1;	IX53_03000;	ACJ75906.1;	ABR31014.1;	NC_022792.1_prot_WP_012004069.1_2041;	NC_022795.1_prot_WP_038059809.1_2059;	ABV34593.1;	NC_021214.1_prot_WP_010865419.1_1854;	ADA66711.1;	ACM22969.1;	ABQ46957.1;	NZ_AP014510.1_prot_WP_041083912.1_2062;	NC_010483.1_prot_WP_010865419.1_953;	AEH52041.1;
ORTHOMCL390(20 genes,20 taxa):	NZ_LN824141.1_prot_WP_045088491.1_68;	ABS61140.1;	AFG35705.1;	ACR80256.1;	AEX85763.1;	AFK06102.1;	ABX30832.1;	IX53_02995;	ACJ75907.1;	ABR31015.1;	NC_022792.1_prot_WP_012004068.1_2040;	NC_022795.1_prot_WP_031504669.1_2058;	ABV34592.1;	NC_021214.1_prot_WP_004082408.1_1853;	ADA66710.1;	ACM22968.1;	ABQ46958.1;	NZ_AP014510.1_prot_WP_041083910.1_2061;	NC_010483.1_prot_WP_004082408.1_954;	AEH52040.1;
ORTHOMCL392(20 genes,20 taxa):	NZ_LN824141.1_prot_WP_045088618.1_907;	ABS61271.1;	AFG35846.1;	ACR80352.1;	AEX86380.1;	AFK06144.1;	ABX30810.1;	IX53_02800;	ACJ75297.1;	ABR30326.1;	NC_022792.1_prot_WP_028843960.1_1260;	NC_022795.1_prot_WP_031502450.1_2026;	ABV33820.1;	NC_021214.1_prot_WP_004082389.1_1834;	ADA66688.1;	ACM22948.1;	ABQ46977.1;	NZ_AP014510.1_prot_WP_041083954.1_54;	NC_010483.1_prot_WP_012310857.1_970;	AEH50401.1;
ORTHOMCL394(20 genes,20 taxa):	NZ_LN824141.1_prot_WP_045087065.1_109;	ABS60036.1;	AFG34558.1;	ACR78969.1;	AEX86122.1;	AFK06501.1;	ABX32495.1;	IX53_09615;	ACJ75991.1;	ABR31020.1;	NC_022792.1_prot_WP_012003653.1_1626;	NC_022795.1_prot_WP_031503370.1_1454;	ABV34177.1;	NC_021214.1_prot_WP_004082200.1_1675;	ADA67209.1;	ACM23047.1;	ABQ46998.1;	NZ_AP014510.1_prot_WP_041082704.1_1194;	NC_010483.1_prot_WP_008194646.1_1138;	AEH50168.1;
ORTHOMCL395(20 genes,20 taxa):	NZ_LN824141.1_prot_WP_045087066.1_110;	ABS60035.1;	AFG34557.1;	ACR78968.1;	AEX86121.1;	AFK06500.1;	ABX32494.1;	IX53_09610;	ACJ75992.1;	ABR31021.1;	NC_022792.1_prot_WP_012003654.1_1627;	NC_022795.1_prot_WP_031503371.1_1453;	ABV34178.1;	NC_021214.1_prot_WP_004082201.1_1676;	ADA67208.1;	ACM23048.1;	ABQ46999.1;	NZ_AP014510.1_prot_WP_041082706.1_1195;	NC_010483.1_prot_WP_012310977.1_1137;	AEH50167.1;
ORTHOMCL396(20 genes,20 taxa):	NZ_LN824141.1_prot_WP_045087050.1_90;	ABS61511.1;	AFG36012.1;	ACR80529.1;	AEX85947.1;	AFK06447.1;	ABX30850.1;	IX53_09020;	ACJ74830.1;	ABR29975.1;	NC_022792.1_prot_WP_038051526.1_1630;	NC_022795.1_prot_WP_031503376.1_1450;	ABV34181.1;	NC_021214.1_prot_WP_004082204.1_1679;	ADA67205.1;	ACM23051.1;	ABQ47002.1;	NZ_AP014510.1_prot_WP_041084166.1_1198;	NC_010483.1_prot_WP_004082204.1_1134;	AEH50164.1;
ORTHOMCL397(20 genes,20 taxa):	NZ_LN824141.1_prot_WP_045087049.1_89;	ABS61512.1;	AFG36011.1;	ACR80530.1;	AEX85946.1;	AFK06446.1;	ABX30849.1;	IX53_09015;	ACJ74831.1;	ABR29976.1;	NC_022792.1_prot_WP_012003658.1_1631;	NC_022795.1_prot_WP_031503378.1_1449;	ABV34182.1;	NC_021214.1_prot_WP_004082205.1_1680;	ADA67204.1;	ACM23052.1;	ABQ47003.1;	NZ_AP014510.1_prot_WP_041082711.1_1199;	NC_010483.1_prot_WP_012310974.1_1133;	AEH50163.1;
ORTHOMCL398(20 genes,20 taxa):	NZ_LN824141.1_prot_WP_045087048.1_88;	ABS61513.1;	AFG36010.1;	ACR80531.1;	AEX85945.1;	AFK06445.1;	ABX30848.1;	IX53_09010;	ACJ74832.1;	ABR29977.1;	NC_022792.1_prot_WP_012003659.1_1632;	NC_022795.1_prot_WP_031503380.1_1448;	ABV34183.1;	NC_021214.1_prot_WP_004082206.1_1681;	ADA67203.1;	ACM23053.1;	ABQ47004.1;	NZ_AP014510.1_prot_WP_012003659.1_1200;	NC_010483.1_prot_WP_004082206.1_1132;	AEH50162.1;
ORTHOMCL399(20 genes,20 taxa):	NZ_LN824141.1_prot_WP_045087047.1_87;	ABS61514.1;	AFG36009.1;	ACR80532.1;	AEX85944.1;	AFK06444.1;	ABX30847.1;	IX53_09005;	ACJ74833.1;	ABR29978.1;	NC_022792.1_prot_WP_028843786.1_1633;	NC_022795.1_prot_WP_031503382.1_1447;	ABV34184.1;	NC_021214.1_prot_WP_004082207.1_1682;	ADA67202.1;	ACM23054.1;	ABQ47005.1;	NZ_AP014510.1_prot_WP_041082715.1_1201;	NC_010483.1_prot_WP_012310973.1_1131;	AEH50161.1;
ORTHOMCL400(20 genes,20 taxa):	NZ_LN824141.1_prot_WP_045088412.1_1714;	ABS60778.1;	AFG35392.1;	ACR80135.1;	AEX86251.1;	AFK06000.1;	ABX30932.1;	IX53_04115;	ACJ74858.1;	ABR30006.1;	NC_022792.1_prot_WP_028843464.1_314;	NC_022795.1_prot_WP_031504740.1_36;	ABV32895.1;	NC_021214.1_prot_WP_004082209.1_1684;	ADA67200.1;	ACM23056.1;	ABQ47007.1;	NZ_AP014510.1_prot_WP_041081372.1_307;	NC_010483.1_prot_WP_012310971.1_1129;	AEH51792.1;
ORTHOMCL401(20 genes,20 taxa):	NZ_LN824141.1_prot_WP_045088196.1_1453;	ABS60858.1;	AFG35368.1;	ACR80386.1;	AEX86124.1;	AFK06303.1;	ABX32243.1;	IX53_00390;	ACJ74580.1;	ABR31631.1;	NC_022792.1_prot_WP_028843598.1_8;	NC_022795.1_prot_WP_031504701.1_9;	ABV32581.1;	NC_021214.1_prot_WP_004082211.1_1686;	ADA67198.1;	ACM23057.1;	ABQ47009.1;	NZ_AP014510.1_prot_WP_041083765.1_1963;	NC_010483.1_prot_WP_012310969.1_1127;	AEH50116.1;
ORTHOMCL402(20 genes,20 taxa):	NZ_LN824141.1_prot_WP_045088384.1_1682;	ABS61001.1;	AFG35544.1;	ACR80711.1;	AEX86199.1;	AFK05777.1;	ABX30906.1;	IX53_02150;	ACJ75964.1;	ABR31225.1;	NC_022792.1_prot_WP_012002566.1_502;	NC_022795.1_prot_WP_031502964.1_1739;	ABV33085.1;	NC_021214.1_prot_WP_004082221.1_1696;	ADA67188.1;	ACM23069.1;	ABQ47019.1;	NZ_AP014510.1_prot_WP_041083577.1_1778;	NC_010483.1_prot_WP_012310962.1_1117;	AEH50484.1;
ORTHOMCL403(20 genes,20 taxa):	NZ_LN824141.1_prot_WP_045088383.1_1681;	ABS61002.1;	AFG35543.1;	ACR80710.1;	AEX86198.1;	AFK05776.1;	ABX30905.1;	IX53_02145;	ACJ75963.1;	ABR31224.1;	NC_022792.1_prot_WP_012002567.1_503;	NC_022795.1_prot_WP_031502963.1_1740;	ABV33086.1;	NC_021214.1_prot_WP_004082222.1_1697;	ADA67187.1;	ACM23070.1;	ABQ47020.1;	NZ_AP014510.1_prot_WP_041083576.1_1777;	NC_010483.1_prot_WP_012310961.1_1116;	AEH50483.1;
ORTHOMCL404(20 genes,20 taxa):	NZ_LN824141.1_prot_WP_045088743.1_1679;	ABS61004.1;	AFG35541.1;	ACR80708.1;	AEX86196.1;	AFK05774.1;	ABX30903.1;	IX53_02135;	ACJ75961.1;	ABR31222.1;	NC_022792.1_prot_WP_028843400.1_505;	NC_022795.1_prot_WP_031502959.1_1742;	ABV33088.1;	NC_021214.1_prot_WP_004082224.1_1699;	ADA67185.1;	ACM23072.1;	ABQ47022.1;	NZ_AP014510.1_prot_WP_041083574.1_1775;	NC_010483.1_prot_WP_011943558.1_1115;	AEH50481.1;
ORTHOMCL405(20 genes,20 taxa):	NZ_LN824141.1_prot_WP_045088380.1_1677;	ABS61006.1;	AFG35539.1;	ACR80704.1;	AEX86195.1;	AFK08010.1;	ABX30901.1;	IX53_02130;	ACJ75959.1;	ABR31220.1;	NC_022792.1_prot_WP_028843398.1_507;	NC_022795.1_prot_WP_031502955.1_1744;	ABV33090.1;	NC_021214.1_prot_WP_004082226.1_1701;	ADA67183.1;	ACM23074.1;	ABQ47024.1;	NZ_AP014510.1_prot_WP_041083572.1_1773;	NC_010483.1_prot_WP_012310959.1_1113;	AEH50479.1;
ORTHOMCL406(20 genes,20 taxa):	NZ_LN824141.1_prot_WP_045088755.1_1785;	ABS60134.1;	AFG34900.1;	ACR78986.1;	AEX84800.1;	AFK06518.1;	ABX31696.1;	IX53_09700;	ACJ76288.1;	ABR31374.1;	NC_022792.1_prot_WP_028843393.1_522;	NC_022795.1_prot_WP_031504302.1_624;	ABV33106.1;	NC_021214.1_prot_WP_004082230.1_1705;	ADA67179.1;	ACM23078.1;	ABQ47028.1;	NZ_AP014510.1_prot_WP_041084302.1_1630;	NC_010483.1_prot_WP_012310955.1_1109;	AEH50463.1;
ORTHOMCL407(20 genes,20 taxa):	NZ_LN824141.1_prot_WP_045088675.1_1291;	ABS61534.1;	AFG35988.1;	ACR80624.1;	AEX85225.1;	AFK06355.1;	ABX32592.1;	IX53_08530;	ACJ76211.1;	ABR31348.1;	NC_022792.1_prot_WP_038051477.1_1855;	NC_022795.1_prot_WP_031504706.1_13;	ABV34406.1;	NC_021214.1_prot_WP_004082231.1_1706;	ADA67178.1;	ACM23079.1;	ABQ47029.1;	NZ_AP014510.1_prot_WP_041083598.1_1806;	NC_010483.1_prot_WP_012310954.1_1108;	AEH51819.1;
ORTHOMCL408(20 genes,20 taxa):	NZ_LN824141.1_prot_WP_045088063.1_1293;	ABS61532.1;	AFG35990.1;	ACR80623.1;	AEX85223.1;	AFK06356.1;	ABX32594.1;	IX53_08535;	ACJ76209.1;	ABR31350.1;	NC_022792.1_prot_WP_028843677.1_1857;	NC_022795.1_prot_WP_031504710.1_15;	ABV34408.1;	NC_021214.1_prot_WP_004082233.1_1708;	ADA67176.1;	ACM23081.1;	ABQ47031.1;	NZ_AP014510.1_prot_WP_041084372.1_1804;	NC_010483.1_prot_WP_012310952.1_1106;	AEH51821.1;
ORTHOMCL409(20 genes,20 taxa):	NZ_LN824141.1_prot_WP_045088064.1_1294;	ABS60835.1;	AFG35200.1;	ACR80622.1;	AEX85222.1;	AFK06357.1;	ABX32595.1;	IX53_08540;	ACJ76284.1;	ABR31370.1;	NC_022792.1_prot_WP_012003885.1_1858;	NC_022795.1_prot_WP_031504711.1_16;	ABV34409.1;	NC_021214.1_prot_WP_004082234.1_1709;	ADA67175.1;	ACM23082.1;	ABQ47032.1;	NZ_AP014510.1_prot_WP_041083596.1_1803;	NC_010483.1_prot_WP_011943568.1_1105;	AEH51822.1;
ORTHOMCL410(20 genes,20 taxa):	NZ_LN824141.1_prot_WP_045087206.1_276;	ABS61097.1;	AFG35559.1;	ACR80796.1;	AEX84694.1;	AFK06600.1;	ABX31726.1;	IX53_01480;	ACJ75720.1;	ABR30862.1;	NC_022792.1_prot_WP_012003463.1_1420;	NC_022795.1_prot_WP_031503359.1_1461;	ABV33987.1;	NC_021214.1_prot_WP_004082235.1_1710;	ADA67174.1;	ACM23083.1;	ABQ47033.1;	NZ_AP014510.1_prot_WP_041082197.1_864;	NC_010483.1_prot_WP_012310951.1_1104;	AEH50227.1;
ORTHOMCL411(20 genes,20 taxa):	NZ_LN824141.1_prot_WP_045087666.1_816;	ABS60629.1;	AFG35089.1;	ACR80204.1;	AEX84902.1;	AFK06056.1;	ABX31832.1;	IX53_03335;	ACJ75624.1;	ABR30778.1;	NC_022792.1_prot_WP_028843388.1_540;	NC_022795.1_prot_WP_031503281.1_1565;	ABV33124.1;	NC_021214.1_prot_WP_004082241.1_1717;	ADA67168.1;	ACM23099.1;	ABQ47039.1;	NZ_AP014510.1_prot_WP_041083353.1_1610;	NC_010483.1_prot_WP_012310935.1_1088;	AEH50844.1;
ORTHOMCL412(20 genes,20 taxa):	NZ_LN824141.1_prot_WP_045088009.1_1229;	ABS60019.1;	AFG34533.1;	ACR78933.1;	AEX85364.1;	AFK06742.1;	ABX32061.1;	IX53_01875;	ACJ76297.1;	ABR31383.1;	NC_022792.1_prot_WP_012002975.1_908;	NC_022795.1_prot_WP_031503668.1_1289;	ABV33494.1;	NC_021214.1_prot_WP_004082245.1_1721;	ADA67164.1;	ACM23104.1;	ABQ47043.1;	NZ_AP014510.1_prot_WP_041082663.1_1168;	NC_010483.1_prot_WP_011943578.1_1084;	AEH50640.1;
ORTHOMCL413(20 genes,20 taxa):	NZ_LN824141.1_prot_WP_045088010.1_1230;	ABS60020.1;	AFG34534.1;	ACR79527.1;	AEX85363.1;	AFK07488.1;	ABX32060.1;	IX53_09140;	ACJ76298.1;	ABR31384.1;	NC_022792.1_prot_WP_012002976.1_909;	NC_022795.1_prot_WP_031503665.1_1290;	ABV33495.1;	NC_021214.1_prot_WP_004082246.1_1722;	ADA67163.1;	ACM23105.1;	ABQ47044.1;	NZ_AP014510.1_prot_WP_041082661.1_1167;	NC_010483.1_prot_WP_011943579.1_1083;	AEH50641.1;
ORTHOMCL414(20 genes,20 taxa):	NZ_LN824141.1_prot_WP_045088012.1_1232;	ABS60022.1;	AFG34536.1;	ACR78931.1;	AEX85361.1;	AFK06741.1;	ABX32058.1;	IX53_01865;	ACJ76300.1;	ABR31386.1;	NC_022792.1_prot_WP_028843246.1_911;	NC_022795.1_prot_WP_038059710.1_1292;	ABV33497.1;	NC_021214.1_prot_WP_004082250.1_1724;	ADA67161.1;	ACM23107.1;	ABQ47046.1;	NZ_AP014510.1_prot_WP_041082658.1_1165;	NC_010483.1_prot_WP_012310932.1_1081;	AEH50643.1;
ORTHOMCL415(20 genes,20 taxa):	NZ_LN824141.1_prot_WP_045088013.1_1233;	ABS60023.1;	AFG34537.1;	ACR78930.1;	AEX85360.1;	AFK06740.1;	ABX32057.1;	IX53_01860;	ACJ76301.1;	ABR31387.1;	NC_022792.1_prot_WP_012002979.1_912;	NC_022795.1_prot_WP_031503661.1_1293;	ABV33498.1;	NC_021214.1_prot_WP_004082252.1_1725;	ADA67160.1;	ACM23108.1;	ABQ47047.1;	NZ_AP014510.1_prot_WP_041082657.1_1164;	NC_010483.1_prot_WP_004082252.1_1080;	AEH50644.1;
ORTHOMCL416(20 genes,20 taxa):	NZ_LN824141.1_prot_WP_045088279.1_1555;	ABS60238.1;	AFG34323.1;	ACR80398.1;	AEX85493.1;	AFK05945.1;	ABX32075.1;	IX53_02190;	ACJ75416.1;	ABR30713.1;	NC_022792.1_prot_WP_012002766.1_699;	NC_022795.1_prot_WP_031502677.1_1894;	ABV33285.1;	NC_021214.1_prot_WP_004082258.1_1728;	ADA67157.1;	ACM23111.1;	ABQ47050.1;	NZ_AP014510.1_prot_WP_041082005.1_740;	NC_010483.1_prot_WP_004082258.1_1077;	AEH50985.1;
ORTHOMCL417(20 genes,20 taxa):	NZ_LN824141.1_prot_WP_045087968.1_1179;	ABS60452.1;	AFG34987.1;	ACR78744.1;	AEX85536.1;	AFK07070.1;	ABX32364.1;	IX53_00075;	ACJ75778.1;	ABR30912.1;	NC_022792.1_prot_WP_028843338.1_694;	NC_022795.1_prot_WP_031502687.1_1889;	ABV33280.1;	NC_021214.1_prot_WP_004082259.1_1729;	ADA67156.1;	ACM23112.1;	ABQ47051.1;	NZ_AP014510.1_prot_WP_041081997.1_735;	NC_010483.1_prot_WP_004082259.1_1076;	AEH50990.1;
ORTHOMCL418(20 genes,20 taxa):	NZ_LN824141.1_prot_WP_045088580.1_616;	ABS60555.1;	AFG35079.1;	ACR80295.1;	AEX85323.1;	AFK07831.1;	ABX31331.1;	IX53_03135;	ACJ74772.1;	ABR29933.1;	NC_022792.1_prot_WP_038051816.1_1468;	NC_022795.1_prot_WP_038059860.1_920;	ABV34036.1;	NC_021214.1_prot_WP_004082263.1_1731;	ADA67154.1;	ACM23114.1;	ABQ47053.1;	NZ_AP014510.1_prot_WP_041081885.1_670;	NC_010483.1_prot_WP_011943583.1_1074;	AEH50182.1;
ORTHOMCL419(20 genes,20 taxa):	NZ_LN824141.1_prot_WP_045087495.1_615;	ABS60866.1;	AFG35360.1;	ACR80294.1;	AEX85322.1;	AFK07830.1;	ABX31330.1;	IX53_03140;	ACJ76197.1;	ABR31362.1;	NC_022792.1_prot_WP_012003513.1_1469;	NC_022795.1_prot_WP_031505110.1_919;	ABV34037.1;	NC_021214.1_prot_WP_004082265.1_1732;	ADA67153.1;	ACM23115.1;	ABQ47054.1;	NZ_AP014510.1_prot_WP_041081883.1_669;	NC_010483.1_prot_WP_011943584.1_1073;	AEH50181.1;
ORTHOMCL420(20 genes,20 taxa):	NZ_LN824141.1_prot_WP_045088231.1_1495;	ABS59973.1;	AFG34485.1;	ACR80842.1;	AEX84607.1;	AFK07062.1;	ABX32173.1;	IX53_10340;	ACJ74841.1;	ABR29986.1;	NC_022792.1_prot_WP_028843722.1_1770;	NC_022795.1_prot_WP_031503927.1_1141;	ABV34319.1;	NC_021214.1_prot_WP_004082288.1_1745;	ADA67148.1;	ACM23120.1;	ABQ47059.1;	NZ_AP014510.1_prot_WP_041082289.1_923;	NC_010483.1_prot_WP_012310923.1_1061;	AEH51879.1;
ORTHOMCL421(20 genes,20 taxa):	NZ_LN824141.1_prot_WP_045088228.1_1491;	ABS59977.1;	AFG34489.1;	ACR80838.1;	AEX84611.1;	AFK07066.1;	ABX32177.1;	IX53_10320;	ACJ74837.1;	ABR29982.1;	NC_022792.1_prot_WP_012003791.1_1766;	NC_022795.1_prot_WP_031503923.1_1145;	ABV34315.1;	NC_021214.1_prot_WP_004082295.1_1749;	ADA67144.1;	ACM23123.1;	ABQ47062.1;	NZ_AP014510.1_prot_WP_041082296.1_927;	NC_010483.1_prot_WP_012310919.1_1057;	AEH51883.1;
ORTHOMCL422(20 genes,20 taxa):	NZ_LN824141.1_prot_WP_045088227.1_1490;	ABS59978.1;	AFG34490.1;	ACR80837.1;	AEX84612.1;	AFK07067.1;	ABX32178.1;	IX53_10315;	ACJ74836.1;	ABR29981.1;	NC_022792.1_prot_WP_038051725.1_1765;	NC_022795.1_prot_WP_031503921.1_1146;	ABV34314.1;	NC_021214.1_prot_WP_004082297.1_1750;	ADA67143.1;	ACM23124.1;	ABQ47063.1;	NZ_AP014510.1_prot_WP_041082297.1_928;	NC_010483.1_prot_WP_012310918.1_1056;	AEH51884.1;
ORTHOMCL423(20 genes,20 taxa):	NZ_LN824141.1_prot_WP_045088226.1_1489;	ABS59979.1;	AFG34491.1;	ACR80836.1;	AEX84613.1;	AFK07068.1;	ABX32179.1;	IX53_10310;	ACJ74835.1;	ABR29980.1;	NC_022792.1_prot_WP_012003789.1_1764;	NC_022795.1_prot_WP_031503919.1_1147;	ABV34313.1;	NC_021214.1_prot_WP_004082299.1_1751;	ADA67142.1;	ACM23125.1;	ABQ47064.1;	NZ_AP014510.1_prot_WP_041082299.1_929;	NC_010483.1_prot_WP_011943594.1_1055;	AEH51885.1;
ORTHOMCL424(20 genes,20 taxa):	NZ_LN824141.1_prot_WP_045088225.1_1488;	ABS59980.1;	AFG34492.1;	ACR80835.1;	AEX84614.1;	AFK07069.1;	ABX32180.1;	IX53_10305;	ACJ74834.1;	ABR29979.1;	NC_022792.1_prot_WP_038051499.1_1763;	NC_022795.1_prot_WP_031503916.1_1148;	ABV34312.1;	NC_021214.1_prot_WP_004082301.1_1752;	ADA67141.1;	ACM23126.1;	ABQ47065.1;	NZ_AP014510.1_prot_WP_041082301.1_930;	NC_010483.1_prot_WP_012310917.1_1054;	AEH51886.1;
ORTHOMCL425(20 genes,20 taxa):	NZ_LN824141.1_prot_WP_045088206.1_1467;	ABS60353.1;	AFG34940.1;	ACR80416.1;	AEX85082.1;	AFK06688.1;	ABX32209.1;	IX53_02565;	ACJ74651.1;	ABR31682.1;	NC_022792.1_prot_WP_012004079.1_2051;	NC_022795.1_prot_WP_031504684.1_2069;	ABV34603.1;	NC_021214.1_prot_WP_004082307.1_1753;	ADA67140.1;	ACM23127.1;	ABQ47066.1;	NZ_AP014510.1_prot_WP_041083933.1_2072;	NC_010483.1_prot_WP_011943596.1_1053;	AEH52051.1;
ORTHOMCL426(20 genes,20 taxa):	NZ_LN824141.1_prot_WP_045088094.1_1331;	ABS61515.1;	AFG36008.1;	ACR79602.1;	AEX85228.1;	AFK07021.1;	ABX32633.1;	IX53_05195;	ACJ74561.1;	ABR31592.1;	NC_022792.1_prot_WP_028843580.1_60;	NC_022795.1_prot_WP_031502468.1_2015;	ABV32632.1;	NC_021214.1_prot_WP_004082308.1_1754;	ADA67139.1;	ACM23128.1;	ABQ47067.1;	NZ_AP014510.1_prot_WP_041082161.1_841;	NC_010483.1_prot_WP_011943597.1_1052;	AEH50853.1;
ORTHOMCL427(20 genes,20 taxa):	NZ_LN824141.1_prot_WP_045087010.1_35;	ABS59961.1;	AFG34473.1;	ACR80794.1;	AEX84692.1;	AFK06598.1;	ABX30760.1;	IX53_01490;	ACJ75423.1;	ABR30706.1;	NC_022792.1_prot_WP_012003542.1_1499;	NC_022795.1_prot_WP_031505082.1_947;	ABV34066.1;	NC_021214.1_prot_WP_004082309.1_1755;	ADA67138.1;	ACM23129.1;	ABQ47068.1;	NZ_AP014510.1_prot_WP_041082995.1_1370;	NC_010483.1_prot_WP_011943598.1_1051;	AEH51630.1;
ORTHOMCL428(20 genes,20 taxa):	NZ_LN824141.1_prot_WP_045087204.1_274;	ABS59963.1;	AFG34475.1;	ACR80792.1;	AEX84690.1;	AFK06596.1;	ABX31724.1;	IX53_01500;	ACJ75421.1;	ABR30708.1;	NC_022792.1_prot_WP_038051556.1_1501;	NC_022795.1_prot_WP_031505084.1_945;	ABV34068.1;	NC_021214.1_prot_WP_004082311.1_1757;	ADA67136.1;	ACM23131.1;	ABQ47070.1;	NZ_AP014510.1_prot_WP_041082991.1_1368;	NC_010483.1_prot_WP_012310916.1_1049;	AEH51628.1;
ORTHOMCL429(20 genes,20 taxa):	NZ_LN824141.1_prot_WP_045088119.1_1358;	ABS60927.1;	AFG35435.1;	ACR80791.1;	AEX86397.1;	AFK06595.1;	ABX32446.1;	IX53_01505;	ACJ75043.1;	ABR30176.1;	NC_022792.1_prot_WP_038051801.1_1502;	NC_022795.1_prot_WP_031505085.1_944;	ABV34069.1;	NC_021214.1_prot_WP_010865397.1_1758;	ADA67135.1;	ACM23132.1;	ABQ47071.1;	NZ_AP014510.1_prot_WP_041082989.1_1367;	NC_010483.1_prot_WP_012310915.1_1048;	AEH51627.1;
ORTHOMCL430(20 genes,20 taxa):	NZ_LN824141.1_prot_WP_045088120.1_1359;	ABS61185.1;	AFG35813.1;	ACR80790.1;	AEX86396.1;	AFK06594.1;	ABX32447.1;	IX53_01510;	ACJ74706.1;	ABR31739.1;	NC_022792.1_prot_WP_028843866.1_1503;	NC_022795.1_prot_WP_031505086.1_943;	ABV34070.1;	NC_021214.1_prot_WP_004082313.1_1759;	ADA67134.1;	ACM23133.1;	ABQ47072.1;	NZ_AP014510.1_prot_WP_041082987.1_1366;	NC_010483.1_prot_WP_012310914.1_1047;	AEH51626.1;
ORTHOMCL431(20 genes,20 taxa):	NZ_LN824141.1_prot_WP_045088530.1_280;	ABS61412.1;	AFG35883.1;	ACR80232.1;	AEX84810.1;	AFK06979.1;	ABX31730.1;	IX53_04290;	ACJ74715.1;	ABR31748.1;	NC_022792.1_prot_WP_028843610.1_2017;	NC_022795.1_prot_WP_038059519.1_1025;	ABV34569.1;	NC_021214.1_prot_WP_004082314.1_1760;	ADA67133.1;	ACM23134.1;	ABQ47073.1;	NZ_AP014510.1_prot_WP_041081223.1_208;	NC_010483.1_prot_WP_012310913.1_1046;	AEH52031.1;
ORTHOMCL432(20 genes,20 taxa):	NZ_LN824141.1_prot_WP_045088529.1_273;	ABS61360.1;	AFG34215.1;	ACR80789.1;	AEX84689.1;	AFK06593.1;	ABX31723.1;	IX53_01515;	ACJ74977.1;	ABR30126.1;	NC_022792.1_prot_WP_028843611.1_2015;	NC_022795.1_prot_WP_038059521.1_1027;	ABV34567.1;	NC_021214.1_prot_WP_004082316.1_1762;	ADA67131.1;	ACM23136.1;	ABQ47075.1;	NZ_AP014510.1_prot_WP_041081221.1_206;	NC_010483.1_prot_WP_012310912.1_1044;	AEH52029.1;
ORTHOMCL433(20 genes,20 taxa):	NZ_LN824141.1_prot_WP_045087522.1_648;	ABS61359.1;	AFG34216.1;	ACR80788.1;	AEX85781.1;	AFK06592.1;	ABX31808.1;	IX53_01520;	ACJ74976.1;	ABR30125.1;	NC_022792.1_prot_WP_012004042.1_2014;	NC_022795.1_prot_WP_031502211.1_1028;	ABV34566.1;	NC_021214.1_prot_WP_004082317.1_1763;	ADA67130.1;	ACM23137.1;	ABQ47076.1;	NZ_AP014510.1_prot_WP_041081220.1_205;	NC_010483.1_prot_WP_004082317.1_1043;	AEH52028.1;
ORTHOMCL434(20 genes,20 taxa):	NZ_LN824141.1_prot_WP_045087523.1_649;	ABS61358.1;	AFG34217.1;	ACR80787.1;	AEX85782.1;	AFK06591.1;	ABX31809.1;	IX53_01525;	ACJ74975.1;	ABR30124.1;	NC_022792.1_prot_WP_028843612.1_2013;	NC_022795.1_prot_WP_031502212.1_1029;	ABV34565.1;	NC_021214.1_prot_WP_004082318.1_1764;	ADA67129.1;	ACM23138.1;	ABQ47077.1;	NZ_AP014510.1_prot_WP_041081218.1_204;	NC_010483.1_prot_WP_012310911.1_1042;	AEH52027.1;
ORTHOMCL435(20 genes,20 taxa):	NZ_LN824141.1_prot_WP_045087363.1_464;	ABS60588.1;	AFG35049.1;	ACR80217.1;	AEX86489.1;	AFK06071.1;	ABX30987.1;	IX53_03270;	ACJ76162.1;	ABR31257.1;	NC_022792.1_prot_WP_012002328.1_263;	NC_022795.1_prot_WP_031504513.1_507;	ABV32847.1;	NC_021214.1_prot_WP_004082321.1_1767;	ADA67126.1;	ACM23141.1;	ABQ47080.1;	NZ_AP014510.1_prot_WP_041083430.1_1662;	NC_010483.1_prot_WP_012310908.1_1039;	AEH51361.1;
ORTHOMCL436(20 genes,20 taxa):	NZ_LN824141.1_prot_WP_045088351.1_1642;	ABS60590.1;	AFG35047.1;	ACR80219.1;	AEX85381.1;	AFK06073.1;	ABX31264.1;	IX53_03260;	ACJ76163.1;	ABR31259.1;	NC_022792.1_prot_WP_012002326.1_261;	NC_022795.1_prot_WP_031504515.1_505;	ABV32845.1;	NC_021214.1_prot_WP_004082323.1_1769;	ADA67124.1;	ACM23143.1;	ABQ47082.1;	NZ_AP014510.1_prot_WP_041083434.1_1664;	NC_010483.1_prot_WP_012310906.1_1037;	AEH51363.1;
ORTHOMCL438(20 genes,20 taxa):	NZ_LN824141.1_prot_WP_045088334.1_1623;	ABS60208.1;	AFG34874.1;	ACR80423.1;	AEX86152.1;	AFK06691.1;	ABX32160.1;	IX53_02530;	ACJ76327.1;	ABR31413.1;	NC_022792.1_prot_WP_012004013.1_1986;	NC_022795.1_prot_WP_031502255.1_1055;	ABV34537.1;	NC_021214.1_prot_WP_004082363.1_1808;	ADA67098.1;	ACM22925.1;	ABQ47116.1;	NZ_AP014510.1_prot_WP_041081173.1_178;	NC_010483.1_prot_WP_012310874.1_996;	AEH52002.1;
ORTHOMCL440(20 genes,20 taxa):	NZ_LN824141.1_prot_WP_045088703.1_1455;	ABS61064.1;	AFG35950.1;	ACR79715.1;	AEX84801.1;	AFK07797.1;	ABX32242.1;	IX53_06125;	ACJ75596.1;	ABR30747.1;	NC_022792.1_prot_WP_028843805.1_1595;	NC_022795.1_prot_WP_031502903.1_1771;	ABV34146.1;	NC_021214.1_prot_WP_004082190.1_1665;	ADA67217.1;	ACM23270.1;	ABQ47133.1;	NZ_AP014510.1_prot_WP_041082235.1_890;	NC_010483.1_prot_WP_012310981.1_1147;	AEH51284.1;
ORTHOMCL441(20 genes,20 taxa):	NZ_LN824141.1_prot_WP_045088707.1_1471;	ABS61120.1;	AFG35726.1;	ACR80809.1;	AEX86146.1;	AFK06776.1;	ABX32205.1;	IX53_01780;	ACJ74559.1;	ABR31590.1;	NC_022792.1_prot_WP_038051828.1_1403;	NC_022795.1_prot_WP_031504799.1_77;	ABV33970.1;	NC_021214.1_prot_WP_004082182.1_1656;	ADA67228.1;	ACM22899.1;	ABQ47141.1;	NZ_AP014510.1_prot_WP_041082863.1_1295;	NC_010483.1_prot_WP_012310987.1_1154;	AEH51972.1;
ORTHOMCL443(20 genes,20 taxa):	NZ_LN824141.1_prot_WP_045088272.1_1543;	ABS59990.1;	AFG34501.1;	ACR79008.1;	AEX85505.1;	AFK06537.1;	ABX32086.1;	IX53_09820;	ACJ74614.1;	ABR31597.1;	NC_022792.1_prot_WP_012002831.1_764;	NC_022795.1_prot_WP_031502734.1_1863;	ABV33350.1;	NC_021214.1_prot_WP_004082174.1_1652;	ADA67232.1;	ACM22903.1;	ABQ47145.1;	NZ_AP014510.1_prot_WP_041083140.1_1475;	NC_010483.1_prot_WP_004082174.1_1158;	AEH50711.1;
ORTHOMCL444(20 genes,20 taxa):	NZ_LN824141.1_prot_WP_045088125.1_1364;	ABS59991.1;	AFG34502.1;	ACR79009.1;	AEX85670.1;	AFK06538.1;	ABX32418.1;	IX53_09825;	ACJ74615.1;	ABR31596.1;	NC_022792.1_prot_WP_012002832.1_765;	NC_022795.1_prot_WP_031502732.1_1864;	ABV33351.1;	NC_021214.1_prot_WP_004082172.1_1651;	ADA67233.1;	ACM22904.1;	ABQ47146.1;	NZ_AP014510.1_prot_WP_041083142.1_1476;	NC_010483.1_prot_WP_011943663.1_1159;	AEH50712.1;
ORTHOMCL445(20 genes,20 taxa):	NZ_LN824141.1_prot_WP_045088271.1_1542;	ABS59992.1;	AFG34503.1;	ACR79010.1;	AEX85506.1;	AFK06539.1;	ABX32087.1;	IX53_09830;	ACJ74616.1;	ABR31595.1;	NC_022792.1_prot_WP_012002833.1_766;	NC_022795.1_prot_WP_031502730.1_1865;	ABV33352.1;	NC_021214.1_prot_WP_004082170.1_1650;	ADA67234.1;	ACM22905.1;	ABQ47147.1;	NZ_AP014510.1_prot_WP_041083143.1_1477;	NC_010483.1_prot_WP_004082170.1_1160;	AEH50713.1;
ORTHOMCL446(20 genes,20 taxa):	NZ_LN824141.1_prot_WP_045088270.1_1541;	ABS59993.1;	AFG34504.1;	ACR79011.1;	AEX85507.1;	AFK06540.1;	ABX32088.1;	IX53_09835;	ACJ74617.1;	ABR31594.1;	NC_022792.1_prot_WP_012002834.1_767;	NC_022795.1_prot_WP_031502729.1_1866;	ABV33353.1;	NC_021214.1_prot_WP_004082168.1_1649;	ADA67235.1;	ACM22906.1;	ABQ47148.1;	NZ_AP014510.1_prot_WP_041083145.1_1478;	NC_010483.1_prot_WP_004082168.1_1161;	AEH50714.1;
ORTHOMCL447(20 genes,20 taxa):	NZ_LN824141.1_prot_WP_045087655.1_802;	ABS61333.1;	AFG34242.1;	ACR80261.1;	AEX85046.1;	AFK06107.1;	ABX31598.1;	IX53_02965;	ACJ74642.1;	ABR31673.1;	NC_022792.1_prot_WP_028843216.1_965;	NC_022795.1_prot_WP_031503642.1_1304;	ABV33552.1;	NC_021214.1_prot_WP_004082164.1_1647;	ADA67237.1;	ACM22908.1;	ABQ47150.1;	NZ_AP014510.1_prot_WP_041084215.1_1338;	NC_010483.1_prot_WP_011943665.1_1163;	AEH50659.1;
ORTHOMCL448(20 genes,20 taxa):	NZ_LN824141.1_prot_WP_045087656.1_803;	ABS61332.1;	AFG34243.1;	ACR80262.1;	AEX85047.1;	AFK06108.1;	ABX31599.1;	IX53_02960;	ACJ74643.1;	ABR31674.1;	NC_022792.1_prot_WP_012003034.1_966;	NC_022795.1_prot_WP_031503640.1_1305;	ABV33553.1;	NC_021214.1_prot_WP_004082162.1_1646;	ADA67238.1;	ACM22909.1;	ABQ47151.1;	NZ_AP014510.1_prot_WP_041082933.1_1337;	NC_010483.1_prot_WP_012310991.1_1164;	AEH50660.1;
ORTHOMCL449(20 genes,20 taxa):	NZ_LN824141.1_prot_WP_045087657.1_804;	ABS61331.1;	AFG34244.1;	ACR80263.1;	AEX85048.1;	AFK06109.1;	ABX31600.1;	IX53_02955;	ACJ74644.1;	ABR31675.1;	NC_022792.1_prot_WP_012003035.1_967;	NC_022795.1_prot_WP_031503639.1_1306;	ABV33554.1;	NC_021214.1_prot_WP_004082160.1_1645;	ADA67239.1;	ACM22910.1;	ABQ47152.1;	NZ_AP014510.1_prot_WP_041082931.1_1336;	NC_010483.1_prot_WP_012310992.1_1165;	AEH50661.1;
ORTHOMCL450(20 genes,20 taxa):	NZ_LN824141.1_prot_WP_045087658.1_805;	ABS61330.1;	AFG34245.1;	ACR80264.1;	AEX85049.1;	AFK06110.1;	ABX31601.1;	IX53_02950;	ACJ74645.1;	ABR31676.1;	NC_022792.1_prot_WP_012003036.1_968;	NC_022795.1_prot_WP_031503637.1_1307;	ABV33555.1;	NC_021214.1_prot_WP_004082158.1_1644;	ADA67240.1;	ACM22911.1;	ABQ47153.1;	NZ_AP014510.1_prot_WP_041082929.1_1335;	NC_010483.1_prot_WP_012310993.1_1166;	AEH50662.1;
ORTHOMCL451(20 genes,20 taxa):	NZ_LN824141.1_prot_WP_045087659.1_806;	ABS61384.1;	AFG34191.1;	ACR80265.1;	AEX85050.1;	AFK06111.1;	ABX31602.1;	IX53_02945;	ACJ76068.1;	ABR31138.1;	NC_022792.1_prot_WP_012003037.1_969;	NC_022795.1_prot_WP_031503635.1_1308;	ABV33556.1;	NC_021214.1_prot_WP_004082156.1_1643;	ADA67241.1;	ACM22912.1;	ABQ47154.1;	NZ_AP014510.1_prot_WP_041082927.1_1334;	NC_010483.1_prot_WP_012310994.1_1167;	AEH50663.1;
ORTHOMCL452(20 genes,20 taxa):	NZ_LN824141.1_prot_WP_045087661.1_808;	ABS60563.1;	AFG35073.1;	ACR80267.1;	AEX84940.1;	AFK06112.1;	ABX31604.1;	IX53_02940;	ACJ74954.1;	ABR30103.1;	NC_022792.1_prot_WP_012003038.1_970;	NC_022795.1_prot_WP_031503634.1_1309;	ABV33557.1;	NC_021214.1_prot_WP_004082152.1_1641;	ADA67243.1;	ACM22914.1;	ABQ47156.1;	NZ_AP014510.1_prot_WP_041082925.1_1333;	NC_010483.1_prot_WP_004082152.1_1169;	AEH50664.1;
ORTHOMCL453(20 genes,20 taxa):	NZ_LN824141.1_prot_WP_045088606.1_811;	ABS60562.1;	AFG35074.1;	ACR80268.1;	AEX84941.1;	AFK06114.1;	ABX31605.1;	IX53_02930;	ACJ74953.1;	ABR30102.1;	NC_022792.1_prot_WP_038051258.1_971;	NC_022795.1_prot_WP_031503632.1_1310;	ABV33558.1;	NC_021214.1_prot_WP_004082149.1_1640;	ADA67244.1;	ACM22915.1;	ABQ47157.1;	NZ_AP014510.1_prot_WP_041082923.1_1332;	NC_010483.1_prot_WP_012310996.1_1170;	AEH50665.1;
ORTHOMCL454(20 genes,20 taxa):	NZ_LN824141.1_prot_WP_045087218.1_289;	ABS60561.1;	AFG35075.1;	ACR80269.1;	AEX84942.1;	AFK06115.1;	ABX31627.1;	IX53_02925;	ACJ74952.1;	ABR30101.1;	NC_022792.1_prot_WP_012003040.1_972;	NC_022795.1_prot_WP_031503630.1_1311;	ABV33559.1;	NC_021214.1_prot_WP_004082147.1_1639;	ADA67245.1;	ACM22916.1;	ABQ47158.1;	NZ_AP014510.1_prot_WP_041082919.1_1330;	NC_010483.1_prot_WP_012310997.1_1171;	AEH50666.1;
ORTHOMCL455(20 genes,20 taxa):	NZ_LN824141.1_prot_WP_045088613.1_851;	ABS60773.1;	AFG35397.1;	ACR78985.1;	AEX84799.1;	AFK06517.1;	ABX32554.1;	IX53_09695;	ACJ75948.1;	ABR31209.1;	NC_022792.1_prot_WP_012002460.1_398;	NC_022795.1_prot_WP_031504593.1_454;	ABV32979.1;	NC_021214.1_prot_WP_004082118.1_1629;	ADA67255.1;	ACM22997.1;	ABQ47168.1;	NZ_AP014510.1_prot_WP_041083646.1_1866;	NC_010483.1_prot_WP_008194934.1_1291;	AEH50889.1;
ORTHOMCL456(20 genes,20 taxa):	NZ_LN824141.1_prot_WP_045088705.1_1461;	ABS60273.1;	AFG34358.1;	ACR79255.1;	AEX84914.1;	AFK06477.1;	ABX32225.1;	IX53_05340;	ACJ76220.1;	ABR31337.1;	NC_022792.1_prot_WP_012003770.1_1745;	NC_022795.1_prot_WP_031503885.1_1164;	ABV34294.1;	NC_021214.1_prot_WP_004082108.1_1624;	ADA67260.1;	ACM23003.1;	ABQ47173.1;	NZ_AP014510.1_prot_WP_041081052.1_27;	NC_010483.1_prot_WP_012311048.1_1286;	AEH51897.1;
ORTHOMCL457(20 genes,20 taxa):	NZ_LN824141.1_prot_WP_045088337.1_1626;	ABS60460.1;	AFG34995.1;	ACR80420.1;	AEX86155.1;	AFK06684.1;	ABX32157.1;	IX53_02545;	ACJ74888.1;	ABR30037.1;	NC_022792.1_prot_WP_012002499.1_436;	NC_022795.1_prot_WP_031503076.1_1675;	ABV33018.1;	NC_021214.1_prot_WP_004082105.1_1621;	ADA67263.1;	ACM23005.1;	ABQ47176.1;	NZ_AP014510.1_prot_WP_041081431.1_350;	NC_010483.1_prot_WP_012311047.1_1283;	AEH50920.1;
ORTHOMCL458(20 genes,20 taxa):	NZ_LN824141.1_prot_WP_045088338.1_1627;	ABS60459.1;	AFG34994.1;	ACR80419.1;	AEX86156.1;	AFK06685.1;	ABX32156.1;	IX53_02550;	ACJ74889.1;	ABR30038.1;	NC_022792.1_prot_WP_012002500.1_437;	NC_022795.1_prot_WP_031503073.1_1676;	ABV33019.1;	NC_021214.1_prot_WP_004082104.1_1620;	ADA67264.1;	ACM23006.1;	ABQ47177.1;	NZ_AP014510.1_prot_WP_041081432.1_351;	NC_010483.1_prot_WP_012311046.1_1282;	AEH50921.1;
ORTHOMCL459(20 genes,20 taxa):	NZ_LN824141.1_prot_WP_045088339.1_1628;	ABS60458.1;	AFG34993.1;	ACR80418.1;	AEX86157.1;	AFK06686.1;	ABX32155.1;	IX53_02555;	ACJ74890.1;	ABR30039.1;	NC_022792.1_prot_WP_012002501.1_438;	NC_022795.1_prot_WP_031503071.1_1677;	ABV33020.1;	NC_021214.1_prot_WP_004082103.1_1619;	ADA67265.1;	ACM23007.1;	ABQ47178.1;	NZ_AP014510.1_prot_WP_041081434.1_352;	NC_010483.1_prot_WP_012311045.1_1281;	AEH50922.1;
ORTHOMCL460(20 genes,20 taxa):	NZ_LN824141.1_prot_WP_045088340.1_1629;	ABS60457.1;	AFG34992.1;	ACR80417.1;	AEX86158.1;	AFK06687.1;	ABX32154.1;	IX53_02560;	ACJ74891.1;	ABR30040.1;	NC_022792.1_prot_WP_012002502.1_439;	NC_022795.1_prot_WP_031503070.1_1678;	ABV33021.1;	NC_021214.1_prot_WP_004082100.1_1618;	ADA67266.1;	ACM23008.1;	ABQ47179.1;	NZ_AP014510.1_prot_WP_041081436.1_353;	NC_010483.1_prot_WP_012311044.1_1280;	AEH50923.1;
ORTHOMCL461(20 genes,20 taxa):	NZ_LN824141.1_prot_WP_045088205.1_1466;	ABS60737.1;	AFG35589.1;	ACR78997.1;	AEX85971.1;	AFK06527.1;	ABX32212.1;	IX53_09765;	ACJ74958.1;	ABR30107.1;	NC_022792.1_prot_WP_012002292.1_227;	NC_022795.1_prot_WP_031505202.1_270;	ABV32811.1;	NC_021214.1_prot_WP_004082094.1_1615;	ADA67269.1;	ACM23011.1;	ABQ47182.1;	NZ_AP014510.1_prot_WP_041083619.1_1829;	NC_010483.1_prot_WP_012311041.1_1277;	AEH50308.1;
ORTHOMCL462(20 genes,20 taxa):	NZ_LN824141.1_prot_WP_045087333.1_429;	ABS60472.1;	AFG35006.1;	ACR79716.1;	AEX84468.1;	AFK07796.1;	ABX31636.1;	IX53_06130;	ACJ75934.1;	ABR31194.1;	NC_022792.1_prot_WP_028843394.1_521;	NC_022795.1_prot_WP_031504300.1_625;	ABV33105.1;	NC_021214.1_prot_WP_004082090.1_1613;	ADA67271.1;	ACM23013.1;	ABQ47184.1;	NZ_AP014510.1_prot_WP_041083563.1_1758;	NC_010483.1_prot_WP_008194900.1_1275;	AEH50464.1;
ORTHOMCL463(20 genes,20 taxa):	NZ_LN824141.1_prot_WP_045088489.1_62;	ABS60225.1;	AFG34568.1;	ACR78951.1;	AEX84551.1;	AFK06762.1;	ABX30826.1;	IX53_01970;	ACJ74716.1;	ABR31749.1;	NC_022792.1_prot_WP_028843545.1_144;	NC_022795.1_prot_WP_031505167.1_305;	ABV32726.1;	NC_021214.1_prot_WP_004082086.1_1611;	ADA67273.1;	ACM23015.1;	ABQ47186.1;	NZ_AP014510.1_prot_WP_041081097.1_80;	NC_010483.1_prot_WP_012311039.1_1273;	AEH50373.1;
ORTHOMCL464(20 genes,20 taxa):	NZ_LN824141.1_prot_WP_045088322.1_1608;	ABS60185.1;	AFG34773.1;	ACR79265.1;	AEX85860.1;	AFK07560.1;	ABX32132.1;	IX53_07805;	ACJ75062.1;	ABR30158.1;	NC_022792.1_prot_WP_012002220.1_157;	NC_022795.1_prot_WP_031505170.1_302;	ABV32739.1;	NC_021214.1_prot_WP_004082054.1_1598;	ADA67286.1;	ACM23027.1;	ABQ47199.1;	NZ_AP014510.1_prot_WP_041081084.1_67;	NC_010483.1_prot_WP_004082054.1_1260;	AEH50388.1;
ORTHOMCL465(20 genes,20 taxa):	NZ_LN824141.1_prot_WP_045088735.1_1630;	ABS60002.1;	AFG34514.1;	ACR79266.1;	AEX86184.1;	AFK07559.1;	ABX32153.1;	IX53_07800;	ACJ74608.1;	ABR31603.1;	NC_022792.1_prot_WP_038051629.1_158;	NC_022795.1_prot_WP_031505171.1_301;	ABV32740.1;	NC_021214.1_prot_WP_004082053.1_1597;	ADA67287.1;	ACM23028.1;	ABQ47200.1;	NZ_AP014510.1_prot_WP_041083958.1_66;	NC_010483.1_prot_WP_004082053.1_1259;	AEH50389.1;
ORTHOMCL466(20 genes,20 taxa):	NZ_LN824141.1_prot_WP_045088130.1_1369;	ABS60066.1;	AFG34747.1;	ACR80393.1;	AEX86229.1;	AFK05940.1;	ABX32413.1;	IX53_02215;	ACJ75450.1;	ABR30648.1;	NC_022792.1_prot_WP_012002507.1_444;	NC_022795.1_prot_WP_031503062.1_1683;	ABV33026.1;	NC_021214.1_prot_WP_004082052.1_1596;	ADA67288.1;	ACM23029.1;	ABQ47201.1;	NZ_AP014510.1_prot_WP_041081446.1_358;	NC_010483.1_prot_WP_004082052.1_1258;	AEH50928.1;
ORTHOMCL467(20 genes,20 taxa):	NZ_LN824141.1_prot_WP_045088129.1_1368;	ABS60681.1;	AFG35149.1;	ACR80392.1;	AEX86230.1;	AFK05939.1;	ABX32414.1;	IX53_02220;	ACJ75258.1;	ABR30349.1;	NC_022792.1_prot_WP_028843310.1_796;	NC_022795.1_prot_WP_031502873.1_1789;	ABV33382.1;	NC_021214.1_prot_WP_004082051.1_1595;	ADA67289.1;	ACM23030.1;	ABQ47202.1;	NZ_AP014510.1_prot_WP_041083188.1_1507;	NC_010483.1_prot_WP_012311032.1_1257;	AEH50743.1;
ORTHOMCL468(20 genes,20 taxa):	NZ_LN824141.1_prot_WP_045088154.1_1402;	ABS60574.1;	AFG35062.1;	ACR80827.1;	AEX85078.1;	AFK06955.1;	ABX32278.1;	IX53_10265;	ACJ75459.1;	ABR30639.1;	NC_022792.1_prot_WP_012002804.1_737;	NC_022795.1_prot_WP_031502780.1_1838;	ABV33323.1;	NC_021214.1_prot_WP_004082042.1_1589;	ADA67294.1;	ACM23036.1;	ABQ47208.1;	NZ_AP014510.1_prot_WP_041083104.1_1449;	NC_010483.1_prot_WP_011943712.1_1251;	AEH51002.1;
ORTHOMCL469(20 genes,20 taxa):	NZ_LN824141.1_prot_WP_045087608.1_744;	ABS60129.1;	AFG34905.1;	ACR80286.1;	AEX85770.1;	AFK06131.1;	ABX31693.1;	IX53_03230;	ACJ74776.1;	ABR29937.1;	NC_022792.1_prot_WP_012003322.1_1286;	NC_022795.1_prot_WP_031502562.1_1961;	ABV33846.1;	NC_021214.1_prot_WP_004082040.1_1588;	ADA67295.1;	ACM23038.1;	ABQ47209.1;	NZ_AP014510.1_prot_WP_041082393.1_1001;	NC_010483.1_prot_WP_041434342.1_1250;	AEH51058.1;
ORTHOMCL470(20 genes,20 taxa):	NZ_LN824141.1_prot_WP_045088577.1_598;	ABS60131.1;	AFG34903.1;	ACR80165.1;	AEX84630.1;	AFK06027.1;	ABX31308.1;	IX53_03950;	ACJ76286.1;	ABR31372.1;	NC_022792.1_prot_WP_028843326.1_722;	NC_022795.1_prot_WP_031502817.1_1823;	ABV33308.1;	NC_021214.1_prot_WP_004082036.1_1586;	ADA67297.1;	ACM23040.1;	ABQ47211.1;	NZ_AP014510.1_prot_WP_041083084.1_1434;	NC_010483.1_prot_WP_012311027.1_1248;	AEH51017.1;
ORTHOMCL471(20 genes,20 taxa):	NZ_LN824141.1_prot_WP_045088319.1_1605;	ABS60169.1;	AFG34600.1;	ACR80145.1;	AEX85999.1;	AFK06009.1;	ABX32135.1;	IX53_04060;	ACJ75434.1;	ABR30695.1;	NC_022792.1_prot_WP_028843784.1_1645;	NC_022795.1_prot_WP_031503403.1_1435;	ABV34196.1;	NC_021214.1_prot_WP_004082033.1_1584;	ADA67300.1;	ACM23042.1;	ABQ47214.1;	NZ_AP014510.1_prot_WP_041084170.1_1211;	NC_010483.1_prot_WP_012311025.1_1246;	AEH50151.1;
ORTHOMCL472(20 genes,20 taxa):	NZ_LN824141.1_prot_WP_045087421.1_530;	ABS60517.1;	AFG34392.1;	ACR80143.1;	AEX86151.1;	AFK06007.1;	ABX31436.1;	IX53_04070;	ACJ75648.1;	ABR30786.1;	NC_022792.1_prot_WP_012003382.1_1337;	NC_022795.1_prot_WP_031502936.1_1754;	ABV33906.1;	NC_021214.1_prot_WP_004082031.1_1583;	ADA67301.1;	ACM23043.1;	ABQ47215.1;	NZ_AP014510.1_prot_WP_041083654.1_1875;	NC_010483.1_prot_WP_004082031.1_1245;	AEH51977.1;
ORTHOMCL473(20 genes,20 taxa):	NZ_LN824141.1_prot_WP_045087420.1_529;	ABS60516.1;	AFG34393.1;	ACR80142.1;	AEX86150.1;	AFK06006.1;	ABX31435.1;	IX53_04075;	ACJ75649.1;	ABR30785.1;	NC_022792.1_prot_WP_012003381.1_1336;	NC_022795.1_prot_WP_031502937.1_1753;	ABV33905.1;	NC_021214.1_prot_WP_004082029.1_1582;	ADA67302.1;	ACM23044.1;	ABQ47216.1;	NZ_AP014510.1_prot_WP_041083653.1_1874;	NC_010483.1_prot_WP_004082029.1_1244;	AEH51976.1;
ORTHOMCL474(20 genes,20 taxa):	NZ_LN824141.1_prot_WP_045087419.1_528;	ABS60515.1;	AFG34394.1;	ACR80141.1;	AEX86149.1;	AFK06005.1;	ABX31434.1;	IX53_04080;	ACJ75650.1;	ABR30784.1;	NC_022792.1_prot_WP_028843929.1_1335;	NC_022795.1_prot_WP_031502938.1_1752;	ABV33904.1;	NC_021214.1_prot_WP_004082027.1_1581;	ADA67303.1;	ACM23045.1;	ABQ47217.1;	NZ_AP014510.1_prot_WP_041084397.1_1873;	NC_010483.1_prot_WP_004082027.1_1243;	AEH51975.1;
ORTHOMCL475(20 genes,20 taxa):	NZ_LN824141.1_prot_WP_045087448.1_559;	ABS61100.1;	AFG35556.1;	ACR80453.1;	AEX85111.1;	AFK06675.1;	ABX31268.1;	IX53_08505;	ACJ74802.1;	ABR29962.1;	NC_022792.1_prot_WP_038051504.1_1728;	NC_022795.1_prot_WP_038059671.1_1215;	ABV34278.1;	NC_021214.1_prot_WP_004082016.1_1576;	ADA67308.1;	ACM23345.1;	ABQ47221.1;	NZ_AP014510.1_prot_WP_041081514.1_410;	NC_010483.1_prot_WP_012311021.1_1238;	AEH51445.1;
ORTHOMCL476(20 genes,20 taxa):	NZ_LN824141.1_prot_WP_045087648.1_791;	ABS61595.1;	AFG36082.1;	ACR80593.1;	AEX85810.1;	AFK06384.1;	ABX31587.1;	IX53_08690;	ACJ76308.1;	ABR31394.1;	NC_022792.1_prot_WP_012002746.1_680;	NC_022795.1_prot_WP_031504167.1_697;	ABV33265.1;	NC_021214.1_prot_WP_004082004.1_1570;	ADA67314.1;	ACM23339.1;	ABQ47227.1;	NZ_AP014510.1_prot_WP_041081973.1_721;	NC_010483.1_prot_WP_004082004.1_1232;	AEH51121.1;
ORTHOMCL477(20 genes,20 taxa):	NZ_LN824141.1_prot_WP_045087647.1_790;	ABS61160.1;	AFG35689.1;	ACR80594.1;	AEX85809.1;	AFK06383.1;	ABX31586.1;	IX53_08685;	ACJ75866.1;	ABR30456.1;	NC_022792.1_prot_WP_038051311.1_679;	NC_022795.1_prot_WP_031504166.1_698;	ABV33264.1;	NC_021214.1_prot_WP_004082002.1_1569;	ADA67315.1;	ACM23337.1;	ABQ47228.1;	NZ_AP014510.1_prot_WP_041081971.1_720;	NC_010483.1_prot_WP_012311020.1_1231;	AEH51122.1;
ORTHOMCL478(20 genes,20 taxa):	NZ_LN824141.1_prot_WP_045087693.1_847;	ABS60541.1;	AFG34612.1;	ACR80597.1;	AEX84539.1;	AFK06381.1;	ABX32548.1;	IX53_08670;	ACJ75636.1;	ABR30798.1;	NC_022792.1_prot_WP_012002741.1_675;	NC_022795.1_prot_WP_031504158.1_702;	ABV33260.1;	NC_021214.1_prot_WP_004081995.1_1565;	ADA67319.1;	ACM23333.1;	ABQ47232.1;	NZ_AP014510.1_prot_WP_041081963.1_716;	NC_010483.1_prot_WP_008194815.1_1227;	AEH51126.1;
ORTHOMCL479(20 genes,20 taxa):	NZ_LN824141.1_prot_WP_045087294.1_380;	ABS60507.1;	AFG35039.1;	ACR80159.1;	AEX85212.1;	AFK06022.1;	ABX31068.1;	IX53_03990;	ACJ74566.1;	ABR31634.1;	NC_022792.1_prot_WP_012002173.1_110;	NC_022795.1_prot_WP_031502596.1_1939;	ABV32692.1;	NC_021214.1_prot_WP_004081991.1_1563;	ADA67321.1;	ACM23331.1;	ABQ47234.1;	NZ_AP014510.1_prot_WP_041081352.1_292;	NC_010483.1_prot_WP_008194811.1_1225;	AEH50868.1;
ORTHOMCL480(20 genes,20 taxa):	NZ_LN824141.1_prot_WP_045087295.1_381;	ABS60506.1;	AFG35038.1;	ACR80158.1;	AEX85211.1;	AFK06021.1;	ABX31067.1;	IX53_03995;	ACJ74567.1;	ABR31635.1;	NC_022792.1_prot_WP_012002174.1_111;	NC_022795.1_prot_WP_031502593.1_1940;	ABV32693.1;	NC_021214.1_prot_WP_004081989.1_1562;	ADA67322.1;	ACM23330.1;	ABQ47235.1;	NZ_AP014510.1_prot_WP_041081351.1_291;	NC_010483.1_prot_WP_004081989.1_1224;	AEH50869.1;
ORTHOMCL481(20 genes,20 taxa):	NZ_LN824141.1_prot_WP_045087296.1_382;	ABS60505.1;	AFG35037.1;	ACR80157.1;	AEX85210.1;	AFK06020.1;	ABX31066.1;	IX53_04000;	ACJ74568.1;	ABR31636.1;	NC_022792.1_prot_WP_012002175.1_112;	NC_022795.1_prot_WP_031503288.1_1941;	ABV32694.1;	NC_021214.1_prot_WP_004081987.1_1561;	ADA67323.1;	ACM23329.1;	ABQ47236.1;	NZ_AP014510.1_prot_WP_041081350.1_290;	NC_010483.1_prot_WP_004081987.1_1223;	AEH50870.1;
ORTHOMCL482(20 genes,20 taxa):	NZ_LN824141.1_prot_WP_045088546.1_383;	ABS60504.1;	AFG35036.1;	ACR80156.1;	AEX85209.1;	AFK06019.1;	ABX31065.1;	IX53_04005;	ACJ74569.1;	ABR31637.1;	NC_022792.1_prot_WP_012002176.1_113;	NC_022795.1_prot_WP_031502591.1_1942;	ABV32695.1;	NC_021214.1_prot_WP_004081985.1_1560;	ADA67324.1;	ACM23328.1;	ABQ47237.1;	NZ_AP014510.1_prot_WP_041081349.1_289;	NC_010483.1_prot_WP_004081985.1_1222;	AEH50871.1;
ORTHOMCL483(20 genes,20 taxa):	NZ_LN824141.1_prot_WP_045087297.1_384;	ABS60503.1;	AFG35035.1;	ACR80155.1;	AEX85208.1;	AFK06018.1;	ABX31064.1;	IX53_04010;	ACJ74570.1;	ABR31638.1;	NC_022792.1_prot_WP_012002177.1_114;	NC_022795.1_prot_WP_031502590.1_1943;	ABV32696.1;	NC_021214.1_prot_WP_004081983.1_1559;	ADA67325.1;	ACM23327.1;	ABQ47238.1;	NZ_AP014510.1_prot_WP_041081348.1_288;	NC_010483.1_prot_WP_004081983.1_1221;	AEH50872.1;
ORTHOMCL484(20 genes,20 taxa):	NZ_LN824141.1_prot_WP_045087298.1_385;	ABS60502.1;	AFG35034.1;	ACR80154.1;	AEX85207.1;	AFK06017.1;	ABX31063.1;	IX53_04015;	ACJ74571.1;	ABR31639.1;	NC_022792.1_prot_WP_012002178.1_115;	NC_022795.1_prot_WP_031502589.1_1944;	ABV32697.1;	NC_021214.1_prot_WP_004081981.1_1558;	ADA67326.1;	ACM23326.1;	ABQ47239.1;	NZ_AP014510.1_prot_WP_041081346.1_287;	NC_010483.1_prot_WP_004081981.1_1220;	AEH50873.1;
ORTHOMCL485(20 genes,20 taxa):	NZ_LN824141.1_prot_WP_045087299.1_386;	ABS60501.1;	AFG35033.1;	ACR80153.1;	AEX85206.1;	AFK06016.1;	ABX31062.1;	IX53_04020;	ACJ74572.1;	ABR31640.1;	NC_022792.1_prot_WP_012002179.1_116;	NC_022795.1_prot_WP_031502587.1_1945;	ABV32698.1;	NC_021214.1_prot_WP_004081979.1_1557;	ADA67327.1;	ACM23325.1;	ABQ47240.1;	NZ_AP014510.1_prot_WP_041081344.1_286;	NC_010483.1_prot_WP_004081979.1_1219;	AEH50874.1;
ORTHOMCL486(20 genes,20 taxa):	NZ_LN824141.1_prot_WP_045087300.1_387;	ABS60500.1;	AFG35032.1;	ACR80152.1;	AEX85205.1;	AFK06015.1;	ABX31061.1;	IX53_04025;	ACJ74573.1;	ABR31641.1;	NC_022792.1_prot_WP_012002180.1_117;	NC_022795.1_prot_WP_031502586.1_1946;	ABV32699.1;	NC_021214.1_prot_WP_004081977.1_1556;	ADA67328.1;	ACM23324.1;	ABQ47241.1;	NZ_AP014510.1_prot_WP_041081342.1_285;	NC_010483.1_prot_WP_004081977.1_1218;	AEH50875.1;
ORTHOMCL487(20 genes,20 taxa):	NZ_LN824141.1_prot_WP_045087053.1_93;	ABS60738.1;	AFG35590.1;	ACR80411.1;	AEX85412.1;	AFK08082.1;	ABX30853.1;	IX53_04600;	ACJ75026.1;	ABR30193.1;	NC_022792.1_prot_WP_028843906.1_1363;	NC_022795.1_prot_WP_038059598.1_1954;	ABV33932.1;	NC_021214.1_prot_WP_004081973.1_1554;	ADA67330.1;	ACM23322.1;	ABQ47243.1;	NZ_AP014510.1_prot_WP_041081833.1_638;	NC_010483.1_prot_WP_004081973.1_1216;	AEH51046.1;
ORTHOMCL488(20 genes,20 taxa):	NZ_LN824141.1_prot_WP_045087872.1_1054;	ABS60753.1;	AFG35513.1;	ACR80374.1;	AEX84627.1;	AFK06290.1;	ABX31141.1;	IX53_00455;	ACJ76168.1;	ABR31263.1;	NC_022792.1_prot_WP_012002494.1_431;	NC_022795.1_prot_WP_031503085.1_1670;	ABV33013.1;	NC_021214.1_prot_WP_004081969.1_1552;	ADA67332.1;	ACM23320.1;	ABQ47245.1;	NZ_AP014510.1_prot_WP_041081426.1_345;	NC_010483.1_prot_WP_012311017.1_1214;	AEH50915.1;
ORTHOMCL489(20 genes,20 taxa):	NZ_LN824141.1_prot_WP_045087405.1_512;	ABS60754.1;	AFG35514.1;	ACR80375.1;	AEX84628.1;	AFK06291.1;	ABX31752.1;	IX53_00450;	ACJ76167.1;	ABR31262.1;	NC_022792.1_prot_WP_012002493.1_430;	NC_022795.1_prot_WP_031503087.1_1669;	ABV33012.1;	NC_021214.1_prot_WP_004081967.1_1551;	ADA67333.1;	ACM23319.1;	ABQ47246.1;	NZ_AP014510.1_prot_WP_041081424.1_344;	NC_010483.1_prot_WP_004081967.1_1213;	AEH50914.1;
ORTHOMCL490(20 genes,20 taxa):	NZ_LN824141.1_prot_WP_045087012.1_37;	ABS61350.1;	AFG34225.1;	ACR80376.1;	AEX85714.1;	AFK06292.1;	ABX30758.1;	IX53_00445;	ACJ74968.1;	ABR30117.1;	NC_022792.1_prot_WP_012002492.1_429;	NC_022795.1_prot_WP_031503089.1_1668;	ABV33011.1;	NC_021214.1_prot_WP_004081965.1_1550;	ADA67334.1;	ACM23318.1;	ABQ47247.1;	NZ_AP014510.1_prot_WP_041084016.1_343;	NC_010483.1_prot_WP_012311016.1_1212;	AEH50913.1;
ORTHOMCL491(20 genes,20 taxa):	NZ_LN824141.1_prot_WP_045088449.1_1754;	ABS60578.1;	AFG35058.1;	ACR80377.1;	AEX85715.1;	AFK06293.1;	ABX32329.1;	IX53_00440;	ACJ76104.1;	ABR31174.1;	NC_022792.1_prot_WP_012002491.1_428;	NC_022795.1_prot_WP_031503091.1_1667;	ABV33010.1;	NC_021214.1_prot_WP_004081962.1_1549;	ADA67335.1;	ACM23317.1;	ABQ47248.1;	NZ_AP014510.1_prot_WP_041081422.1_342;	NC_010483.1_prot_WP_004081962.1_1211;	AEH50912.1;
ORTHOMCL492(20 genes,20 taxa):	NZ_LN824141.1_prot_WP_045088733.1_1616;	ABS60044.1;	AFG34729.1;	ACR80378.1;	AEX85718.1;	AFK06295.1;	ABX32167.1;	IX53_00430;	ACJ74939.1;	ABR30088.1;	NC_022792.1_prot_WP_012002488.1_425;	NC_022795.1_prot_WP_038059570.1_1664;	ABV33007.1;	NC_021214.1_prot_WP_010865361.1_1547;	ADA67337.1;	ACM23315.1;	ABQ47250.1;	NZ_AP014510.1_prot_WP_041084015.1_339;	NC_010483.1_prot_WP_010865361.1_1209;	AEH50910.1;
ORTHOMCL493(20 genes,20 taxa):	NZ_LN824141.1_prot_WP_045088329.1_1617;	ABS61372.1;	AFG34203.1;	ACR80379.1;	AEX85719.1;	AFK06296.1;	ABX32166.1;	IX53_00425;	ACJ74938.1;	ABR30087.1;	NC_022792.1_prot_WP_038051325.1_424;	NC_022795.1_prot_WP_031503099.1_1663;	ABV33006.1;	NC_021214.1_prot_WP_004081957.1_1546;	ADA67338.1;	ACM23314.1;	ABQ47251.1;	NZ_AP014510.1_prot_WP_041084014.1_338;	NC_010483.1_prot_WP_004081957.1_1208;	AEH50909.1;
ORTHOMCL494(20 genes,20 taxa):	NZ_LN824141.1_prot_WP_045088330.1_1618;	ABS61371.1;	AFG34204.1;	ACR80380.1;	AEX85720.1;	AFK06297.1;	ABX32165.1;	IX53_00420;	ACJ74937.1;	ABR30086.1;	NC_022792.1_prot_WP_012002486.1_423;	NC_022795.1_prot_WP_031503100.1_1662;	ABV33005.1;	NC_021214.1_prot_WP_024103778.1_1545;	ADA67339.1;	ACM23313.1;	ABQ47252.1;	NZ_AP014510.1_prot_WP_041081415.1_337;	NC_010483.1_prot_WP_012896415.1_1207;	AEH50908.1;
ORTHOMCL495(20 genes,20 taxa):	NZ_LN824141.1_prot_WP_045088331.1_1619;	ABS60832.1;	AFG35197.1;	ACR80381.1;	AEX85721.1;	AFK06298.1;	ABX32164.1;	IX53_00415;	ACJ75818.1;	ABR30408.1;	NC_022792.1_prot_WP_012002485.1_422;	NC_022795.1_prot_WP_031503102.1_1661;	ABV33004.1;	NC_021214.1_prot_WP_004081951.1_1544;	ADA67340.1;	ACM23312.1;	ABQ47253.1;	NZ_AP014510.1_prot_WP_041081414.1_336;	NC_010483.1_prot_WP_012311015.1_1206;	AEH50907.1;
ORTHOMCL496(20 genes,20 taxa):	NZ_LN824141.1_prot_WP_045088332.1_1620;	ABS60833.1;	AFG35198.1;	ACR80382.1;	AEX85722.1;	AFK06299.1;	ABX32163.1;	IX53_00410;	ACJ75817.1;	ABR30407.1;	NC_022792.1_prot_WP_012002484.1_421;	NC_022795.1_prot_WP_031503105.1_1660;	ABV33003.1;	NC_021214.1_prot_WP_004081949.1_1543;	ADA67341.1;	ACM23311.1;	ABQ47254.1;	NZ_AP014510.1_prot_WP_041081413.1_335;	NC_010483.1_prot_WP_012311014.1_1205;	AEH50906.1;
ORTHOMCL497(20 genes,20 taxa):	NZ_LN824141.1_prot_WP_045088333.1_1621;	ABS61525.1;	AFG35998.1;	ACR80383.1;	AEX85723.1;	AFK06300.1;	ABX32162.1;	IX53_00405;	ACJ75725.1;	ABR30864.1;	NC_022792.1_prot_WP_012002483.1_420;	NC_022795.1_prot_WP_031503107.1_1659;	ABV33002.1;	NC_021214.1_prot_WP_004081947.1_1542;	ADA67342.1;	ACM23310.1;	ABQ47255.1;	NZ_AP014510.1_prot_WP_041081412.1_334;	NC_010483.1_prot_WP_004081947.1_1204;	AEH50905.1;
ORTHOMCL498(20 genes,20 taxa):	NZ_LN824141.1_prot_WP_045088544.1_367;	ABS60201.1;	AFG34789.1;	ACR80173.1;	AEX85399.1;	AFK06035.1;	ABX31080.1;	IX53_03910;	ACJ75047.1;	ABR30173.1;	NC_022792.1_prot_WP_028843443.1_357;	NC_022795.1_prot_WP_031503837.1_1193;	ABV32938.1;	NC_021214.1_prot_WP_004081936.1_1537;	ADA67347.1;	ACM23305.1;	ABQ47260.1;	NZ_AP014510.1_prot_WP_041083479.1_1696;	NC_010483.1_prot_WP_012311012.1_1199;	AEH51727.1;
ORTHOMCL499(20 genes,20 taxa):	NZ_LN824141.1_prot_WP_045087284.1_369;	ABS60770.1;	AFG35400.1;	ACR80175.1;	AEX85761.1;	AFK06037.1;	ABX31077.1;	IX53_03890;	ACJ75274.1;	ABR30331.1;	NC_022792.1_prot_WP_012002421.1_358;	NC_022795.1_prot_WP_031503835.1_1195;	ABV32940.1;	NC_021214.1_prot_WP_004081933.1_1535;	ADA67349.1;	ACM23303.1;	ABQ47262.1;	NZ_AP014510.1_prot_WP_041083477.1_1695;	NC_010483.1_prot_WP_004081933.1_1197;	AEH51725.1;
ORTHOMCL500(20 genes,20 taxa):	NZ_LN824141.1_prot_WP_045088069.1_1301;	ABS60331.1;	AFG34656.1;	ACR80824.1;	AEX86366.1;	AFK06952.1;	ABX32602.1;	IX53_10250;	ACJ76022.1;	ABR31049.1;	NC_022792.1_prot_WP_012002814.1_747;	NC_022795.1_prot_WP_031502764.1_1847;	ABV33333.1;	NC_021214.1_prot_WP_004081866.1_1504;	ADA67379.1;	ACM23154.1;	ABQ47291.1;	NZ_AP014510.1_prot_WP_041083115.1_1458;	NC_010483.1_prot_WP_012311104.1_1400;	AEH50696.1;
ORTHOMCL501(20 genes,20 taxa):	NZ_LN824141.1_prot_WP_045087733.1_891;	ABS61590.1;	AFG36077.1;	ACR80234.1;	AEX85173.1;	AFK05952.1;	ABX30796.1;	IX53_04300;	ACJ74656.1;	ABR31689.1;	NC_022792.1_prot_WP_012002614.1_549;	NC_022795.1_prot_WP_031503265.1_1574;	ABV33133.1;	NC_021214.1_prot_WP_004081862.1_1502;	ADA67381.1;	ACM23156.1;	ABQ47293.1;	NZ_AP014510.1_prot_WP_041083338.1_1601;	NC_010483.1_prot_WP_041434352.1_1398;	AEH50835.1;
ORTHOMCL502(20 genes,20 taxa):	NZ_LN824141.1_prot_WP_045088061.1_1290;	ABS61054.1;	AFG35671.1;	ACR80626.1;	AEX85537.1;	AFK06353.1;	ABX31922.1;	IX53_08520;	ACJ76199.1;	ABR31360.1;	NC_022792.1_prot_WP_012003998.1_1971;	NC_022795.1_prot_WP_031504060.1_1070;	ABV34522.1;	NC_021214.1_prot_WP_004081858.1_1500;	ADA67383.1;	ACM23158.1;	ABQ47295.1;	NZ_AP014510.1_prot_WP_041081157.1_163;	NC_010483.1_prot_WP_012311100.1_1396;	AEH51372.1;
ORTHOMCL503(20 genes,20 taxa):	NZ_LN824141.1_prot_WP_045087618.1_757;	ABS60838.1;	AFG35203.1;	ACR80468.1;	AEX84474.1;	AFK07127.1;	ABX31570.1;	IX53_02255;	ACJ75854.1;	ABR30444.1;	NC_022792.1_prot_WP_038051457.1_1973;	NC_022795.1_prot_WP_038059689.1_1068;	ABV34524.1;	NC_021214.1_prot_WP_004081854.1_1498;	ADA67385.1;	ACM23160.1;	ABQ47297.1;	NZ_AP014510.1_prot_WP_041083986.1_165;	NC_010483.1_prot_WP_012311098.1_1394;	AEH51374.1;
ORTHOMCL504(20 genes,20 taxa):	NZ_LN824141.1_prot_WP_045087617.1_756;	ABS60837.1;	AFG35202.1;	ACR80467.1;	AEX84473.1;	AFK07128.1;	ABX31569.1;	IX53_02260;	ACJ75855.1;	ABR30445.1;	NC_022792.1_prot_WP_028843620.1_1974;	NC_022795.1_prot_WP_038059691.1_1067;	ABV34525.1;	NC_021214.1_prot_WP_004081852.1_1497;	ADA67386.1;	ACM23161.1;	ABQ47298.1;	NZ_AP014510.1_prot_WP_041083987.1_166;	NC_010483.1_prot_WP_012311097.1_1393;	AEH51375.1;
ORTHOMCL505(20 genes,20 taxa):	NZ_LN824141.1_prot_WP_045087616.1_755;	ABS60836.1;	AFG35201.1;	ACR80466.1;	AEX84472.1;	AFK07129.1;	ABX31568.1;	IX53_02265;	ACJ75856.1;	ABR30446.1;	NC_022792.1_prot_WP_028843619.1_1975;	NC_022795.1_prot_WP_031504067.1_1066;	ABV34526.1;	NC_021214.1_prot_WP_004081850.1_1496;	ADA67387.1;	ACM23162.1;	ABQ47299.1;	NZ_AP014510.1_prot_WP_041081159.1_167;	NC_010483.1_prot_WP_038034553.1_1392;	AEH51376.1;
ORTHOMCL506(20 genes,20 taxa):	NZ_LN824141.1_prot_WP_045088509.1_146;	ABS60990.1;	AFG35495.1;	ACR80588.1;	AEX85301.1;	AFK06389.1;	ABX31519.1;	IX53_08715;	ACJ75655.1;	ABR30809.1;	NC_022792.1_prot_WP_012002621.1_556;	NC_022795.1_prot_WP_031503261.1_1576;	ABV33140.1;	NC_021214.1_prot_WP_004081846.1_1494;	ADA67389.1;	ACM23164.1;	ABQ47301.1;	NZ_AP014510.1_prot_WP_041083332.1_1597;	NC_010483.1_prot_WP_004081846.1_1390;	AEH50834.1;
ORTHOMCL507(20 genes,20 taxa):	NZ_LN824141.1_prot_WP_045087097.1_147;	ABS60989.1;	AFG35494.1;	ACR80587.1;	AEX85300.1;	AFK06390.1;	ABX31518.1;	IX53_08720;	ACJ75656.1;	ABR30810.1;	NC_022792.1_prot_WP_012002622.1_557;	NC_022795.1_prot_WP_031503259.1_1577;	ABV33141.1;	NC_021214.1_prot_WP_004081843.1_1493;	ADA67390.1;	ACM23165.1;	ABQ47302.1;	NZ_AP014510.1_prot_WP_041083331.1_1596;	NC_010483.1_prot_WP_011943782.1_1389;	AEH50833.1;
ORTHOMCL508(20 genes,20 taxa):	NZ_LN824141.1_prot_WP_045087098.1_148;	ABS60988.1;	AFG35493.1;	ACR80586.1;	AEX85299.1;	AFK06391.1;	ABX31517.1;	IX53_08725;	ACJ75657.1;	ABR30811.1;	NC_022792.1_prot_WP_012002623.1_558;	NC_022795.1_prot_WP_031503257.1_1578;	ABV33142.1;	NC_021214.1_prot_WP_004081841.1_1492;	ADA67391.1;	ACM23166.1;	ABQ47303.1;	NZ_AP014510.1_prot_WP_041084287.1_1595;	NC_010483.1_prot_WP_012311095.1_1388;	AEH50832.1;
ORTHOMCL509(20 genes,20 taxa):	NZ_LN824141.1_prot_WP_045087099.1_149;	ABS60987.1;	AFG35492.1;	ACR80585.1;	AEX85298.1;	AFK06392.1;	ABX31516.1;	IX53_08730;	ACJ75658.1;	ABR30812.1;	NC_022792.1_prot_WP_012002624.1_559;	NC_022795.1_prot_WP_031503255.1_1579;	ABV33143.1;	NC_021214.1_prot_WP_004081839.1_1491;	ADA67392.1;	ACM23167.1;	ABQ47304.1;	NZ_AP014510.1_prot_WP_041083330.1_1594;	NC_010483.1_prot_WP_011943784.1_1387;	AEH50831.1;
ORTHOMCL510(20 genes,20 taxa):	NZ_LN824141.1_prot_WP_045088510.1_150;	ABS60986.1;	AFG35491.1;	ACR80584.1;	AEX85297.1;	AFK06393.1;	ABX31515.1;	IX53_08735;	ACJ75659.1;	ABR30813.1;	NC_022792.1_prot_WP_012002625.1_560;	NC_022795.1_prot_WP_031503253.1_1580;	ABV33144.1;	NC_021214.1_prot_WP_004081837.1_1490;	ADA67393.1;	ACM23168.1;	ABQ47305.1;	NZ_AP014510.1_prot_WP_041083329.1_1593;	NC_010483.1_prot_WP_004081837.1_1386;	AEH50830.1;
ORTHOMCL511(20 genes,20 taxa):	NZ_LN824141.1_prot_WP_045087100.1_151;	ABS60985.1;	AFG35490.1;	ACR80583.1;	AEX85296.1;	AFK06394.1;	ABX31514.1;	IX53_08740;	ACJ75660.1;	ABR30814.1;	NC_022792.1_prot_WP_012002626.1_561;	NC_022795.1_prot_WP_031503251.1_1581;	ABV33145.1;	NC_021214.1_prot_WP_004081835.1_1489;	ADA67394.1;	ACM23169.1;	ABQ47306.1;	NZ_AP014510.1_prot_WP_041084285.1_1592;	NC_010483.1_prot_WP_004081835.1_1385;	AEH50829.1;
ORTHOMCL512(20 genes,20 taxa):	NZ_LN824141.1_prot_WP_045087101.1_152;	ABS60984.1;	AFG35489.1;	ACR80582.1;	AEX85295.1;	AFK06395.1;	ABX31513.1;	IX53_08745;	ACJ75661.1;	ABR30815.1;	NC_022792.1_prot_WP_012002627.1_562;	NC_022795.1_prot_WP_031503249.1_1582;	ABV33146.1;	NC_021214.1_prot_WP_004081834.1_1488;	ADA67395.1;	ACM23170.1;	ABQ47307.1;	NZ_AP014510.1_prot_WP_041083328.1_1591;	NC_010483.1_prot_WP_011943785.1_1384;	AEH50828.1;
ORTHOMCL513(20 genes,20 taxa):	NZ_LN824141.1_prot_WP_045087102.1_153;	ABS60983.1;	AFG35488.1;	ACR80581.1;	AEX85294.1;	AFK06396.1;	ABX31512.1;	IX53_08750;	ACJ75662.1;	ABR30816.1;	NC_022792.1_prot_WP_012002628.1_563;	NC_022795.1_prot_WP_031503247.1_1583;	ABV33147.1;	NC_021214.1_prot_WP_004081832.1_1487;	ADA67396.1;	ACM23171.1;	ABQ47308.1;	NZ_AP014510.1_prot_WP_041083326.1_1590;	NC_010483.1_prot_WP_011943786.1_1383;	AEH50827.1;
ORTHOMCL514(20 genes,20 taxa):	NZ_LN824141.1_prot_WP_045087103.1_154;	ABS60982.1;	AFG35487.1;	ACR80580.1;	AEX85293.1;	AFK06397.1;	ABX31511.1;	IX53_08755;	ACJ75663.1;	ABR30817.1;	NC_022792.1_prot_WP_012002629.1_564;	NC_022795.1_prot_WP_031503246.1_1584;	ABV33148.1;	NC_021214.1_prot_WP_004081830.1_1486;	ADA67397.1;	ACM23172.1;	ABQ47309.1;	NZ_AP014510.1_prot_WP_041083323.1_1589;	NC_010483.1_prot_WP_008194995.1_1382;	AEH50826.1;
ORTHOMCL515(20 genes,20 taxa):	NZ_LN824141.1_prot_WP_045087104.1_155;	ABS60981.1;	AFG35486.1;	ACR80579.1;	AEX85292.1;	AFK06398.1;	ABX31510.1;	IX53_08760;	ACJ75664.1;	ABR30818.1;	NC_022792.1_prot_WP_012002630.1_565;	NC_022795.1_prot_WP_031503245.1_1585;	ABV33149.1;	NC_021214.1_prot_WP_004081828.1_1485;	ADA67398.1;	ACM23173.1;	ABQ47310.1;	NZ_AP014510.1_prot_WP_041083321.1_1588;	NC_010483.1_prot_WP_008194997.1_1381;	AEH50825.1;
ORTHOMCL516(20 genes,20 taxa):	NZ_LN824141.1_prot_WP_045087105.1_156;	ABS60980.1;	AFG35485.1;	ACR80578.1;	AEX85291.1;	AFK06399.1;	ABX31509.1;	IX53_08765;	ACJ75665.1;	ABR30819.1;	NC_022792.1_prot_WP_028843384.1_566;	NC_022795.1_prot_WP_038059633.1_1586;	ABV33150.1;	NC_021214.1_prot_WP_004081826.1_1484;	ADA67399.1;	ACM23174.1;	ABQ47311.1;	NZ_AP014510.1_prot_WP_041083319.1_1587;	NC_010483.1_prot_WP_012311094.1_1380;	AEH50824.1;
ORTHOMCL517(20 genes,20 taxa):	NZ_LN824141.1_prot_WP_045087106.1_157;	ABS60979.1;	AFG35484.1;	ACR80577.1;	AEX85290.1;	AFK06400.1;	ABX31508.1;	IX53_08770;	ACJ75666.1;	ABR30820.1;	NC_022792.1_prot_WP_012002632.1_567;	NC_022795.1_prot_WP_031503241.1_1587;	ABV33151.1;	NC_021214.1_prot_WP_010865350.1_1483;	ADA67400.1;	ACM23175.1;	ABQ47312.1;	NZ_AP014510.1_prot_WP_041083317.1_1586;	NC_010483.1_prot_WP_012311093.1_1379;	AEH50823.1;
ORTHOMCL518(20 genes,20 taxa):	NZ_LN824141.1_prot_WP_045087107.1_158;	ABS60978.1;	AFG35483.1;	ACR80576.1;	AEX85289.1;	AFK06401.1;	ABX31507.1;	IX53_08775;	ACJ75667.1;	ABR30821.1;	NC_022792.1_prot_WP_012002633.1_568;	NC_022795.1_prot_WP_031503239.1_1588;	ABV33152.1;	NC_021214.1_prot_WP_004081822.1_1482;	ADA67401.1;	ACM23176.1;	ABQ47313.1;	NZ_AP014510.1_prot_WP_041083316.1_1585;	NC_010483.1_prot_WP_011943789.1_1378;	AEH50822.1;
ORTHOMCL519(20 genes,20 taxa):	NZ_LN824141.1_prot_WP_045087108.1_159;	ABS60977.1;	AFG35482.1;	ACR80575.1;	AEX85288.1;	AFK06402.1;	ABX31506.1;	IX53_08780;	ACJ75668.1;	ABR30822.1;	NC_022792.1_prot_WP_012002634.1_569;	NC_022795.1_prot_WP_031503237.1_1589;	ABV33153.1;	NC_021214.1_prot_WP_004081820.1_1481;	ADA67402.1;	ACM23177.1;	ABQ47314.1;	NZ_AP014510.1_prot_WP_041083314.1_1584;	NC_010483.1_prot_WP_004081820.1_1377;	AEH50821.1;
ORTHOMCL520(20 genes,20 taxa):	NZ_LN824141.1_prot_WP_045087109.1_160;	ABS60976.1;	AFG35481.1;	ACR80574.1;	AEX85287.1;	AFK06403.1;	ABX31505.1;	IX53_08785;	ACJ75669.1;	ABR30823.1;	NC_022792.1_prot_WP_012002635.1_570;	NC_022795.1_prot_WP_031503235.1_1590;	ABV33154.1;	NC_021214.1_prot_WP_004081818.1_1480;	ADA67403.1;	ACM23178.1;	ABQ47315.1;	NZ_AP014510.1_prot_WP_041083312.1_1583;	NC_010483.1_prot_WP_012311092.1_1376;	AEH50820.1;
ORTHOMCL521(20 genes,20 taxa):	NZ_LN824141.1_prot_WP_045087110.1_161;	ABS60975.1;	AFG35480.1;	ACR80573.1;	AEX85286.1;	AFK06404.1;	ABX31504.1;	IX53_08790;	ACJ75670.1;	ABR30824.1;	NC_022792.1_prot_WP_012002636.1_571;	NC_022795.1_prot_WP_031503234.1_1591;	ABV33155.1;	NC_021214.1_prot_WP_004081816.1_1479;	ADA67404.1;	ACM23179.1;	ABQ47316.1;	NZ_AP014510.1_prot_WP_041083310.1_1582;	NC_010483.1_prot_WP_011943790.1_1375;	AEH50819.1;
ORTHOMCL522(20 genes,20 taxa):	NZ_LN824141.1_prot_WP_045087111.1_162;	ABS60974.1;	AFG35479.1;	ACR80572.1;	AEX85285.1;	AFK06405.1;	ABX31503.1;	IX53_08795;	ACJ75671.1;	ABR30825.1;	NC_022792.1_prot_WP_012002637.1_572;	NC_022795.1_prot_WP_031503233.1_1592;	ABV33156.1;	NC_021214.1_prot_WP_004081814.1_1478;	ADA67405.1;	ACM23180.1;	ABQ47317.1;	NZ_AP014510.1_prot_WP_041083308.1_1581;	NC_010483.1_prot_WP_011943791.1_1374;	AEH50818.1;
ORTHOMCL523(20 genes,20 taxa):	NZ_LN824141.1_prot_WP_045087112.1_163;	ABS60973.1;	AFG35478.1;	ACR80571.1;	AEX85284.1;	AFK06406.1;	ABX31502.1;	IX53_08800;	ACJ75672.1;	ABR30826.1;	NC_022792.1_prot_WP_028843383.1_573;	NC_022795.1_prot_WP_031503231.1_1593;	ABV33157.1;	NC_021214.1_prot_WP_004081811.1_1477;	ADA67406.1;	ACM23181.1;	ABQ47318.1;	NZ_AP014510.1_prot_WP_041083306.1_1580;	NC_010483.1_prot_WP_008195012.1_1373;	AEH50817.1;
ORTHOMCL524(20 genes,20 taxa):	NZ_LN824141.1_prot_WP_045087113.1_164;	ABS60972.1;	AFG35477.1;	ACR80570.1;	AEX85283.1;	AFK06407.1;	ABX31501.1;	IX53_08805;	ACJ75673.1;	ABR30827.1;	NC_022792.1_prot_WP_012002639.1_574;	NC_022795.1_prot_WP_031503229.1_1594;	ABV33158.1;	NC_021214.1_prot_WP_004081809.1_1476;	ADA67407.1;	ACM23182.1;	ABQ47319.1;	NZ_AP014510.1_prot_WP_041083304.1_1579;	NC_010483.1_prot_WP_008195018.1_1372;	AEH50816.1;
ORTHOMCL525(20 genes,20 taxa):	NZ_LN824141.1_prot_WP_045087114.1_165;	ABS60971.1;	AFG35476.1;	ACR80569.1;	AEX85282.1;	AFK06408.1;	ABX31500.1;	IX53_08810;	ACJ75674.1;	ABR30828.1;	NC_022792.1_prot_WP_012002640.1_575;	NC_022795.1_prot_WP_031503227.1_1595;	ABV33159.1;	NC_021214.1_prot_WP_004081806.1_1475;	ADA67408.1;	ACM23183.1;	ABQ47320.1;	NZ_AP014510.1_prot_WP_041083302.1_1578;	NC_010483.1_prot_WP_008195021.1_1371;	AEH50815.1;
ORTHOMCL526(20 genes,20 taxa):	NZ_LN824141.1_prot_WP_045087115.1_166;	ABS60970.1;	AFG35475.1;	ACR80568.1;	AEX85281.1;	AFK06409.1;	ABX31499.1;	IX53_08815;	ACJ75675.1;	ABR30829.1;	NC_022792.1_prot_WP_028843382.1_576;	NC_022795.1_prot_WP_031503225.1_1596;	ABV33160.1;	NC_021214.1_prot_WP_004081804.1_1474;	ADA67409.1;	ACM23184.1;	ABQ47321.1;	NZ_AP014510.1_prot_WP_041083300.1_1577;	NC_010483.1_prot_WP_011943793.1_1370;	AEH50814.1;
ORTHOMCL527(20 genes,20 taxa):	NZ_LN824141.1_prot_WP_045087116.1_167;	ABS60969.1;	AFG35474.1;	ACR80567.1;	AEX85280.1;	AFK06410.1;	ABX31498.1;	IX53_08820;	ACJ75676.1;	ABR30830.1;	NC_022792.1_prot_WP_012002642.1_577;	NC_022795.1_prot_WP_031503223.1_1597;	ABV33161.1;	NC_021214.1_prot_WP_004081803.1_1473;	ADA67410.1;	ACM23185.1;	ABQ47322.1;	NZ_AP014510.1_prot_WP_041083298.1_1576;	NC_010483.1_prot_WP_004081803.1_1369;	AEH50813.1;
ORTHOMCL528(20 genes,20 taxa):	NZ_LN824141.1_prot_WP_045087117.1_168;	ABS60968.1;	AFG35473.1;	ACR80566.1;	AEX85279.1;	AFK06411.1;	ABX31497.1;	IX53_08825;	ACJ75677.1;	ABR30831.1;	NC_022792.1_prot_WP_012002643.1_578;	NC_022795.1_prot_WP_031503221.1_1598;	ABV33162.1;	NC_021214.1_prot_WP_041426931.1_1472;	ADA67411.1;	ACM23186.1;	ABQ47323.1;	NZ_AP014510.1_prot_WP_041083296.1_1575;	NC_010483.1_prot_WP_038034562.1_1368;	AEH50812.1;
ORTHOMCL529(20 genes,20 taxa):	NZ_LN824141.1_prot_WP_045087118.1_169;	ABS60967.1;	AFG35472.1;	ACR80565.1;	AEX85278.1;	AFK06412.1;	ABX31496.1;	IX53_08830;	ACJ75678.1;	ABR30832.1;	NC_022792.1_prot_WP_012002644.1_579;	NC_022795.1_prot_WP_031503219.1_1599;	ABV33163.1;	NC_021214.1_prot_WP_004081798.1_1471;	ADA67412.1;	ACM23187.1;	ABQ47324.1;	NZ_AP014510.1_prot_WP_041083295.1_1574;	NC_010483.1_prot_WP_011943795.1_1367;	AEH50811.1;
ORTHOMCL530(20 genes,20 taxa):	NZ_LN824141.1_prot_WP_045087119.1_170;	ABS60966.1;	AFG35471.1;	ACR80564.1;	AEX85277.1;	AFK06413.1;	ABX31495.1;	IX53_08835;	ACJ75679.1;	ABR30833.1;	NC_022792.1_prot_WP_012002645.1_580;	NC_022795.1_prot_WP_031503217.1_1600;	ABV33164.1;	NC_021214.1_prot_WP_004081797.1_1470;	ADA67413.1;	ACM23188.1;	ABQ47325.1;	NZ_AP014510.1_prot_WP_041083293.1_1573;	NC_010483.1_prot_WP_011943796.1_1366;	AEH50810.1;
ORTHOMCL531(20 genes,20 taxa):	NZ_LN824141.1_prot_WP_045087120.1_171;	ABS60965.1;	AFG35470.1;	ACR80563.1;	AEX85276.1;	AFK06414.1;	ABX31494.1;	IX53_08840;	ACJ75680.1;	ABR30834.1;	NC_022792.1_prot_WP_012002646.1_581;	NC_022795.1_prot_WP_031503215.1_1601;	ABV33165.1;	NC_021214.1_prot_WP_004081795.1_1469;	ADA67414.1;	ACM23189.1;	ABQ47326.1;	NZ_AP014510.1_prot_WP_041083292.1_1572;	NC_010483.1_prot_WP_012311091.1_1365;	AEH50809.1;
ORTHOMCL532(20 genes,20 taxa):	NZ_LN824141.1_prot_WP_045087121.1_172;	ABS60964.1;	AFG35469.1;	ACR80562.1;	AEX85275.1;	AFK06415.1;	ABX31493.1;	IX53_08845;	ACJ75681.1;	ABR30835.1;	NC_022792.1_prot_WP_012002647.1_582;	NC_022795.1_prot_WP_031503214.1_1602;	ABV33166.1;	NC_021214.1_prot_WP_004081793.1_1468;	ADA67415.1;	ACM23190.1;	ABQ47327.1;	NZ_AP014510.1_prot_WP_041083290.1_1571;	NC_010483.1_prot_WP_011943798.1_1364;	AEH50808.1;
ORTHOMCL533(20 genes,20 taxa):	NZ_LN824141.1_prot_WP_045087122.1_173;	ABS60963.1;	AFG35468.1;	ACR80561.1;	AEX85274.1;	AFK06416.1;	ABX31492.1;	IX53_08850;	ACJ75682.1;	ABR30836.1;	NC_022792.1_prot_WP_012002648.1_583;	NC_022795.1_prot_WP_031503212.1_1603;	ABV33167.1;	NC_021214.1_prot_WP_004081791.1_1467;	ADA67416.1;	ACM23191.1;	ABQ47328.1;	NZ_AP014510.1_prot_WP_041083288.1_1570;	NC_010483.1_prot_WP_011943799.1_1363;	AEH50807.1;
ORTHOMCL534(20 genes,20 taxa):	NZ_LN824141.1_prot_WP_045087123.1_174;	ABS60962.1;	AFG35467.1;	ACR80560.1;	AEX85273.1;	AFK06417.1;	ABX31491.1;	IX53_08855;	ACJ75683.1;	ABR30837.1;	NC_022792.1_prot_WP_012002649.1_584;	NC_022795.1_prot_WP_031503210.1_1604;	ABV33168.1;	NC_021214.1_prot_WP_004081789.1_1466;	ADA67417.1;	ACM23192.1;	ABQ47329.1;	NZ_AP014510.1_prot_WP_041083286.1_1569;	NC_010483.1_prot_WP_004081789.1_1362;	AEH50806.1;
ORTHOMCL535(20 genes,20 taxa):	NZ_LN824141.1_prot_WP_045087125.1_176;	ABS60960.1;	AFG35465.1;	ACR80558.1;	AEX85271.1;	AFK06419.1;	ABX31489.1;	IX53_08865;	ACJ75684.1;	ABR30839.1;	NC_022792.1_prot_WP_012002651.1_585;	NC_022795.1_prot_WP_031503209.1_1605;	ABV33170.1;	NC_021214.1_prot_WP_004081785.1_1464;	ADA67419.1;	ACM23194.1;	ABQ47331.1;	NZ_AP014510.1_prot_WP_041083284.1_1568;	NC_010483.1_prot_WP_004081785.1_1360;	AEH50804.1;
ORTHOMCL536(20 genes,20 taxa):	NZ_LN824141.1_prot_WP_045087126.1_177;	ABS60959.1;	AFG35464.1;	ACR80557.1;	AEX85270.1;	AFK06420.1;	ABX31488.1;	IX53_08870;	ACJ75685.1;	ABR30840.1;	NC_022792.1_prot_WP_012002652.1_586;	NC_022795.1_prot_WP_031503207.1_1606;	ABV33171.1;	NC_021214.1_prot_WP_004081783.1_1463;	ADA67420.1;	ACM23195.1;	ABQ47332.1;	NZ_AP014510.1_prot_WP_041083283.1_1567;	NC_010483.1_prot_WP_011943800.1_1359;	AEH50803.1;
ORTHOMCL537(20 genes,20 taxa):	NZ_LN824141.1_prot_WP_045087127.1_178;	ABS60958.1;	AFG35463.1;	ACR80556.1;	AEX85269.1;	AFK06421.1;	ABX31487.1;	IX53_08875;	ACJ75686.1;	ABR30841.1;	NC_022792.1_prot_WP_012002653.1_587;	NC_022795.1_prot_WP_031503204.1_1607;	ABV33172.1;	NC_021214.1_prot_WP_004081780.1_1462;	ADA67421.1;	ACM23196.1;	ABQ47333.1;	NZ_AP014510.1_prot_WP_041083281.1_1566;	NC_010483.1_prot_WP_011943801.1_1358;	AEH50802.1;
ORTHOMCL538(20 genes,20 taxa):	NZ_LN824141.1_prot_WP_045087128.1_179;	ABS60957.1;	AFG35462.1;	ACR80555.1;	AEX85268.1;	AFK06422.1;	ABX31486.1;	IX53_08880;	ACJ75687.1;	ABR30842.1;	NC_022792.1_prot_WP_012002654.1_588;	NC_022795.1_prot_WP_031503202.1_1608;	ABV33173.1;	NC_021214.1_prot_WP_004081779.1_1461;	ADA67422.1;	ACM23197.1;	ABQ47334.1;	NZ_AP014510.1_prot_WP_041083279.1_1565;	NC_010483.1_prot_WP_011943802.1_1357;	AEH50801.1;
ORTHOMCL539(20 genes,20 taxa):	NZ_LN824141.1_prot_WP_045087129.1_180;	ABS60956.1;	AFG35461.1;	ACR80554.1;	AEX85267.1;	AFK06423.1;	ABX31485.1;	IX53_08885;	ACJ75688.1;	ABR30843.1;	NC_022792.1_prot_WP_012002655.1_589;	NC_022795.1_prot_WP_031503199.1_1609;	ABV33174.1;	NC_021214.1_prot_WP_004081777.1_1460;	ADA67423.1;	ACM23198.1;	ABQ47335.1;	NZ_AP014510.1_prot_WP_041083277.1_1564;	NC_010483.1_prot_WP_011943803.1_1356;	AEH50800.1;
ORTHOMCL540(20 genes,20 taxa):	NZ_LN824141.1_prot_WP_045088455.1_1760;	ABS59955.1;	AFG34467.1;	ACR80551.1;	AEX85676.1;	AFK06426.1;	ABX31933.1;	IX53_08895;	ACJ75889.1;	ABR30996.1;	NC_022792.1_prot_WP_012002657.1_591;	NC_022795.1_prot_WP_031503196.1_1611;	ABV33176.1;	NC_021214.1_prot_WP_004081773.1_1458;	ADA67425.1;	ACM23200.1;	ABQ47337.1;	NZ_AP014510.1_prot_WP_041083275.1_1562;	NC_010483.1_prot_WP_011943805.1_1354;	AEH50798.1;
ORTHOMCL541(20 genes,20 taxa):	NZ_LN824141.1_prot_WP_045088285.1_1564;	ABS60271.1;	AFG34356.1;	ACR79257.1;	AEX85926.1;	AFK06479.1;	ABX32065.1;	IX53_05350;	ACJ76218.1;	ABR31339.1;	NC_022792.1_prot_WP_028843734.1_1747;	NC_022795.1_prot_WP_031503889.1_1162;	ABV34296.1;	NC_021214.1_prot_WP_004081764.1_1454;	ADA67429.1;	ACM23204.1;	ABQ47341.1;	NZ_AP014510.1_prot_WP_041081054.1_29;	NC_010483.1_prot_WP_008195058.1_1350;	AEH51895.1;
ORTHOMCL542(20 genes,20 taxa):	NZ_LN824141.1_prot_WP_045087553.1_682;	ABS61034.1;	AFG35631.1;	ACR80093.1;	AEX86445.1;	AFK07154.1;	ABX31623.1;	IX53_03725;	ACJ75911.1;	ABR31092.1;	NC_022792.1_prot_WP_012003994.1_1967;	NC_022795.1_prot_WP_031504057.1_1073;	ABV34518.1;	NC_021214.1_prot_WP_004081760.1_1452;	ADA67431.1;	ACM23205.1;	ABQ47343.1;	NZ_AP014510.1_prot_WP_041081154.1_159;	NC_010483.1_prot_WP_008195064.1_1348;	AEH51366.1;
ORTHOMCL543(20 genes,20 taxa):	NZ_LN824141.1_prot_WP_045087501.1_622;	ABS60889.1;	AFG35332.1;	ACR78982.1;	AEX85236.1;	AFK06514.1;	ABX31338.1;	IX53_09680;	ACJ76266.1;	ABR31473.1;	NC_022792.1_prot_WP_012002840.1_773;	NC_022795.1_prot_WP_031502717.1_1872;	ABV33359.1;	NC_021214.1_prot_WP_004081756.1_1450;	ADA67433.1;	ACM23206.1;	ABQ47345.1;	NZ_AP014510.1_prot_WP_041084256.1_1484;	NC_010483.1_prot_WP_008195067.1_1346;	AEH50720.1;
ORTHOMCL544(20 genes,20 taxa):	NZ_LN824141.1_prot_WP_045087503.1_624;	ABS60887.1;	AFG35334.1;	ACR78980.1;	AEX85234.1;	AFK06512.1;	ABX31340.1;	IX53_09670;	ACJ76267.1;	ABR31475.1;	NC_022792.1_prot_WP_012002842.1_775;	NC_022795.1_prot_WP_031502715.1_1874;	ABV33361.1;	NC_021214.1_prot_WP_004081752.1_1448;	ADA67435.1;	ACM23208.1;	ABQ47347.1;	NZ_AP014510.1_prot_WP_041083159.1_1486;	NC_010483.1_prot_WP_008195070.1_1344;	AEH50722.1;
ORTHOMCL545(20 genes,20 taxa):	NZ_LN824141.1_prot_WP_045088581.1_625;	ABS60886.1;	AFG35335.1;	ACR78979.1;	AEX85233.1;	AFK06511.1;	ABX31341.1;	IX53_09665;	ACJ76268.1;	ABR31476.1;	NC_022792.1_prot_WP_012002843.1_776;	NC_022795.1_prot_WP_031502713.1_1875;	ABV33362.1;	NC_021214.1_prot_WP_004081749.1_1447;	ADA67436.1;	ACM23209.1;	ABQ47348.1;	NZ_AP014510.1_prot_WP_041083161.1_1487;	NC_010483.1_prot_WP_008195072.1_1343;	AEH50723.1;
ORTHOMCL546(20 genes,20 taxa):	NZ_LN824141.1_prot_WP_045087091.1_137;	ABS60303.1;	AFG34253.1;	ACR79063.1;	AEX86054.1;	AFK06922.1;	ABX31529.1;	IX53_10100;	ACJ75761.1;	ABR30897.1;	NC_022792.1_prot_WP_028843617.1_1982;	NC_022795.1_prot_WP_031502260.1_1058;	ABV34533.1;	NC_021214.1_prot_WP_004081746.1_1445;	ADA67438.1;	ACM23211.1;	ABQ47350.1;	NZ_AP014510.1_prot_WP_041081165.1_174;	NC_010483.1_prot_WP_008195075.1_1341;	AEH51998.1;
ORTHOMCL547(20 genes,20 taxa):	NZ_LN824141.1_prot_WP_045087093.1_139;	ABS60301.1;	AFG34255.1;	ACR79064.1;	AEX86056.1;	AFK06923.1;	ABX31527.1;	IX53_10105;	ACJ75759.1;	ABR30895.1;	NC_022792.1_prot_WP_012004007.1_1980;	NC_022795.1_prot_WP_031502264.1_1060;	ABV34531.1;	NC_021214.1_prot_WP_004081742.1_1443;	ADA67440.1;	ACM23213.1;	ABQ47352.1;	NZ_AP014510.1_prot_WP_041081163.1_172;	NC_010483.1_prot_WP_004081742.1_1339;	AEH51996.1;
ORTHOMCL548(20 genes,20 taxa):	NZ_LN824141.1_prot_WP_045087095.1_141;	ABS60299.1;	AFG34257.1;	ACR79065.1;	AEX86058.1;	AFK06924.1;	ABX31525.1;	IX53_10110;	ACJ75757.1;	ABR30893.1;	NC_022792.1_prot_WP_012004006.1_1979;	NC_022795.1_prot_WP_031502266.1_1061;	ABV34530.1;	NC_021214.1_prot_WP_004081738.1_1441;	ADA67442.1;	ACM23215.1;	ABQ47354.1;	NZ_AP014510.1_prot_WP_041081162.1_171;	NC_010483.1_prot_WP_004081738.1_1337;	AEH51995.1;
ORTHOMCL549(20 genes,20 taxa):	NZ_LN824141.1_prot_WP_045087096.1_142;	ABS60298.1;	AFG34258.1;	ACR79066.1;	AEX86059.1;	AFK06925.1;	ABX31524.1;	IX53_10115;	ACJ75756.1;	ABR30892.1;	NC_022792.1_prot_WP_012004005.1_1978;	NC_022795.1_prot_WP_031502268.1_1062;	ABV34529.1;	NC_021214.1_prot_WP_004081735.1_1440;	ADA67443.1;	ACM23216.1;	ABQ47355.1;	NZ_AP014510.1_prot_WP_041081161.1_170;	NC_010483.1_prot_WP_012311087.1_1336;	AEH51994.1;
ORTHOMCL550(20 genes,20 taxa):	NZ_LN824141.1_prot_WP_045088506.1_143;	ABS60297.1;	AFG34259.1;	ACR79067.1;	AEX86060.1;	AFK06926.1;	ABX31523.1;	IX53_10120;	ACJ75755.1;	ABR30891.1;	NC_022792.1_prot_WP_012004004.1_1977;	NC_022795.1_prot_WP_031502269.1_1063;	ABV34528.1;	NC_021214.1_prot_WP_004081732.1_1439;	ADA67444.1;	ACM23217.1;	ABQ47356.1;	NZ_AP014510.1_prot_WP_041081160.1_169;	NC_010483.1_prot_WP_012311086.1_1335;	AEH51993.1;
ORTHOMCL551(20 genes,20 taxa):	NZ_LN824141.1_prot_WP_045088249.1_1516;	ABS61591.1;	AFG36078.1;	ACR80832.1;	AEX85165.1;	AFK06961.1;	ABX32111.1;	IX53_10290;	ACJ74657.1;	ABR31690.1;	NC_022792.1_prot_WP_038051313.1_594;	NC_022795.1_prot_WP_038059630.1_1614;	ABV33179.1;	NC_021214.1_prot_WP_004081728.1_1437;	ADA67446.1;	ACM23219.1;	ABQ47358.1;	NZ_AP014510.1_prot_WP_041084278.1_1559;	NC_010483.1_prot_WP_012311085.1_1333;	AEH50795.1;
ORTHOMCL552(20 genes,20 taxa):	NZ_LN824141.1_prot_WP_045088435.1_1738;	ABS60774.1;	AFG35396.1;	ACR78941.1;	AEX85101.1;	AFK06749.1;	ABX32310.1;	IX53_01915;	ACJ75394.1;	ABR30674.1;	NC_022792.1_prot_WP_012003683.1_1657;	NC_022795.1_prot_WP_031504560.1_475;	ABV34207.1;	NC_021214.1_prot_WP_004081723.1_1434;	ADA67449.1;	ACM23222.1;	ABQ47361.1;	NZ_AP014510.1_prot_WP_041081695.1_540;	NC_010483.1_prot_WP_012311082.1_1330;	AEH50418.1;
ORTHOMCL553(20 genes,20 taxa):	NZ_LN824141.1_prot_WP_045088436.1_1740;	ABS61081.1;	AFG35933.1;	ACR78940.1;	AEX85102.1;	AFK06748.1;	ABX32311.1;	IX53_01910;	ACJ76261.1;	ABR31468.1;	NC_022792.1_prot_WP_012003682.1_1656;	NC_022795.1_prot_WP_031504559.1_476;	ABV34206.1;	NC_021214.1_prot_WP_004081721.1_1433;	ADA67450.1;	ACM23223.1;	ABQ47362.1;	NZ_AP014510.1_prot_WP_041081696.1_541;	NC_010483.1_prot_WP_012311081.1_1329;	AEH50417.1;
ORTHOMCL554(20 genes,20 taxa):	NZ_LN824141.1_prot_WP_045088439.1_1743;	ABS61079.1;	AFG35935.1;	ACR78937.1;	AEX85105.1;	AFK06746.1;	ABX32314.1;	IX53_01895;	ACJ76259.1;	ABR31466.1;	NC_022792.1_prot_WP_012003679.1_1653;	NC_022795.1_prot_WP_031504553.1_479;	ABV34203.1;	NC_021214.1_prot_WP_004081716.1_1430;	ADA67452.1;	ACM23226.1;	ABQ47365.1;	NZ_AP014510.1_prot_WP_041081702.1_544;	NC_010483.1_prot_WP_012311078.1_1326;	AEH50414.1;
ORTHOMCL555(20 genes,20 taxa):	NZ_LN824141.1_prot_WP_045088440.1_1744;	ABS61077.1;	AFG35937.1;	ACR78936.1;	AEX85106.1;	AFK06745.1;	ABX32315.1;	IX53_01890;	ACJ76257.1;	ABR31464.1;	NC_022792.1_prot_WP_012003677.1_1651;	NC_022795.1_prot_WP_031504550.1_481;	ABV34201.1;	NC_021214.1_prot_WP_004081712.1_1428;	ADA67454.1;	ACM23228.1;	ABQ47367.1;	NZ_AP014510.1_prot_WP_041081705.1_546;	NC_010483.1_prot_WP_012311077.1_1324;	AEH50412.1;
ORTHOMCL556(20 genes,20 taxa):	NZ_LN824141.1_prot_WP_045087489.1_608;	ABS60720.1;	AFG35293.1;	ACR79102.1;	AEX85952.1;	AFK07142.1;	ABX31323.1;	IX53_07125;	ACJ75012.1;	ABR30208.1;	NC_022792.1_prot_WP_012003809.1_1783;	NC_022795.1_prot_WP_038059679.1_1128;	ABV34333.1;	NC_021214.1_prot_WP_004081709.1_1426;	ADA67456.1;	ACM23230.1;	ABQ47369.1;	NZ_AP014510.1_prot_WP_041082266.1_909;	NC_010483.1_prot_WP_012311075.1_1322;	AEH51864.1;
ORTHOMCL557(20 genes,20 taxa):	NZ_LN824141.1_prot_WP_045088431.1_1734;	ABS60321.1;	AFG34635.1;	ACR78777.1;	AEX85395.1;	AFK06910.1;	ABX32306.1;	IX53_00260;	ACJ74962.1;	ABR30111.1;	NC_022792.1_prot_WP_012003110.1_1043;	NC_022795.1_prot_WP_031503523.1_1372;	ABV33629.1;	NC_021214.1_prot_WP_004081704.1_1424;	ADA67458.1;	ACM23233.1;	ABQ47371.1;	NZ_AP014510.1_prot_WP_041082452.1_1040;	NC_010483.1_prot_WP_012311073.1_1320;	AEH51314.1;
ORTHOMCL558(20 genes,20 taxa):	NZ_LN824141.1_prot_WP_045087336.1_433;	ABS60554.1;	AFG35080.1;	ACR78883.1;	AEX85728.1;	AFK06180.1;	ABX31023.1;	IX53_02745;	ACJ75138.1;	ABR30482.1;	NC_022792.1_prot_WP_012003142.1_1088;	NC_022795.1_prot_WP_031502487.1_2004;	ABV33661.1;	NC_021214.1_prot_WP_004081696.1_1421;	ADA67461.1;	ACM23236.1;	ABQ47374.1;	NZ_AP014510.1_prot_WP_041082370.1_986;	NC_010483.1_prot_WP_012311070.1_1317;	AEH51074.1;
ORTHOMCL559(20 genes,20 taxa):	NZ_LN824141.1_prot_WP_045087335.1_432;	ABS60553.1;	AFG35081.1;	ACR78884.1;	AEX85729.1;	AFK06179.1;	ABX31024.1;	IX53_02750;	ACJ75137.1;	ABR30483.1;	NC_022792.1_prot_WP_012003141.1_1087;	NC_022795.1_prot_WP_031502490.1_2003;	ABV33660.1;	NC_021214.1_prot_WP_008195104.1_1420;	ADA67462.1;	ACM23237.1;	ABQ47375.1;	NZ_AP014510.1_prot_WP_041082372.1_987;	NC_010483.1_prot_WP_041434348.1_1316;	AEH51073.1;
ORTHOMCL560(20 genes,20 taxa):	NZ_LN824141.1_prot_WP_045088556.1_431;	ABS60552.1;	AFG35082.1;	ACR78885.1;	AEX85730.1;	AFK06178.1;	ABX31025.1;	IX53_02755;	ACJ75136.1;	ABR30484.1;	NC_022792.1_prot_WP_012003140.1_1086;	NC_022795.1_prot_WP_031502493.1_2002;	ABV33659.1;	NC_021214.1_prot_WP_004081690.1_1419;	ADA67463.1;	ACM23238.1;	ABQ47376.1;	NZ_AP014510.1_prot_WP_041082374.1_988;	NC_010483.1_prot_WP_012311068.1_1315;	AEH51072.1;
ORTHOMCL561(20 genes,20 taxa):	NZ_LN824141.1_prot_WP_045087665.1_815;	ABS60274.1;	AFG34359.1;	ACR79254.1;	AEX84915.1;	AFK06476.1;	ABX31026.1;	IX53_05335;	ACJ75139.1;	ABR30481.1;	NC_022792.1_prot_WP_012003144.1_1090;	NC_022795.1_prot_WP_031502483.1_2006;	ABV33663.1;	NC_021214.1_prot_WP_010865340.1_1417;	ADA67465.1;	ACM23240.1;	ABQ47378.1;	NZ_AP014510.1_prot_WP_041082366.1_984;	NC_010483.1_prot_WP_012311066.1_1313;	AEH51076.1;
ORTHOMCL563(20 genes,20 taxa):	NZ_LN824141.1_prot_WP_045087353.1_451;	ABS59970.1;	AFG34482.1;	ACR80846.1;	AEX84990.1;	AFK08328.1;	ABX31002.1;	IX53_10360;	ACJ74845.1;	ABR29989.1;	NC_022792.1_prot_WP_038051496.1_1773;	NC_022795.1_prot_WP_031503933.1_1138;	ABV34322.1;	NC_021214.1_prot_WP_004081620.1_1388;	ADA67484.1;	ACM23366.1;	ABQ47396.1;	NZ_AP014510.1_prot_WP_041082285.1_920;	NC_010483.1_prot_WP_012311121.1_1420;	AEH51875.1;
ORTHOMCL564(20 genes,20 taxa):	NZ_LN824141.1_prot_WP_045087354.1_452;	ABS59971.1;	AFG34483.1;	ACR80845.1;	AEX84989.1;	AFK08327.1;	ABX31001.1;	IX53_10355;	ACJ74844.1;	ABR29988.1;	NC_022792.1_prot_WP_012003797.1_1772;	NC_022795.1_prot_WP_031503931.1_1139;	ABV34321.1;	NC_021214.1_prot_WP_004081619.1_1387;	ADA67485.1;	ACM23367.1;	ABQ47397.1;	NZ_AP014510.1_prot_WP_041082286.1_921;	NC_010483.1_prot_WP_012311122.1_1421;	AEH51876.1;
ORTHOMCL565(20 genes,20 taxa):	NZ_LN824141.1_prot_WP_045087509.1_634;	ABS61345.1;	AFG34230.1;	ACR80299.1;	AEX84530.1;	AFK07835.1;	ABX31350.1;	IX53_03115;	ACJ76057.1;	ABR31127.1;	NC_022792.1_prot_WP_012003823.1_1797;	NC_022795.1_prot_WP_031503985.1_1114;	ABV34347.1;	NC_021214.1_prot_WP_004081616.1_1386;	ADA67486.1;	ACM23368.1;	ABQ47398.1;	NZ_AP014510.1_prot_WP_041082241.1_895;	NC_010483.1_prot_WP_004081616.1_1422;	AEH51825.1;
ORTHOMCL566(20 genes,20 taxa):	NZ_LN824141.1_prot_WP_045087510.1_635;	ABS61344.1;	AFG34231.1;	ACR80298.1;	AEX84531.1;	AFK07834.1;	ABX31351.1;	IX53_03120;	ACJ76058.1;	ABR31128.1;	NC_022792.1_prot_WP_012003824.1_1798;	NC_022795.1_prot_WP_038059722.1_1113;	ABV34348.1;	NC_021214.1_prot_WP_004081614.1_1385;	ADA67487.1;	ACM23369.1;	ABQ47399.1;	NZ_AP014510.1_prot_WP_041084093.1_894;	NC_010483.1_prot_WP_012311123.1_1423;	AEH51826.1;
ORTHOMCL567(20 genes,20 taxa):	NZ_LN824141.1_prot_WP_045087511.1_636;	ABS61343.1;	AFG34232.1;	ACR80297.1;	AEX84532.1;	AFK07833.1;	ABX31352.1;	IX53_03125;	ACJ76059.1;	ABR31129.1;	NC_022792.1_prot_WP_028843712.1_1799;	NC_022795.1_prot_WP_031503990.1_1112;	ABV34349.1;	NC_021214.1_prot_WP_004081613.1_1384;	ADA67488.1;	ACM23370.1;	ABQ47400.1;	NZ_AP014510.1_prot_WP_041082239.1_893;	NC_010483.1_prot_WP_012311124.1_1424;	AEH51827.1;
ORTHOMCL568(20 genes,20 taxa):	NZ_LN824141.1_prot_WP_045087513.1_638;	ABS61342.1;	AFG34233.1;	ACR80296.1;	AEX84533.1;	AFK07832.1;	ABX31354.1;	IX53_03130;	ACJ76060.1;	ABR31130.1;	NC_022792.1_prot_WP_012003826.1_1800;	NC_022795.1_prot_WP_031503992.1_1111;	ABV34350.1;	NC_021214.1_prot_WP_004081612.1_1383;	ADA67489.1;	ACM23371.1;	ABQ47401.1;	NZ_AP014510.1_prot_WP_041082237.1_892;	NC_010483.1_prot_WP_012311125.1_1425;	AEH51828.1;
ORTHOMCL569(20 genes,20 taxa):	NZ_LN824141.1_prot_WP_045088219.1_1482;	ABS60694.1;	AFG35162.1;	ACR79598.1;	AEX85853.1;	AFK07230.1;	ABX32185.1;	IX53_05220;	ACJ74996.1;	ABR30138.1;	NC_022792.1_prot_WP_028843676.1_1860;	NC_022795.1_prot_WP_031502916.1_1764;	ABV34411.1;	NC_021214.1_prot_WP_004081606.1_1382;	ADA67490.1;	ACM23372.1;	ABQ47402.1;	NZ_AP014510.1_prot_WP_041083602.1_1810;	NC_010483.1_prot_WP_012311126.1_1426;	AEH51815.1;
ORTHOMCL570(20 genes,20 taxa):	NZ_LN824141.1_prot_WP_045088456.1_1761;	ABS60050.1;	AFG34735.1;	ACR80470.1;	AEX85677.1;	AFK07125.1;	ABX31934.1;	IX53_02245;	ACJ74725.1;	ABR31757.1;	NC_022792.1_prot_WP_012002845.1_778;	NC_022795.1_prot_WP_031505307.1_792;	ABV33364.1;	NC_021214.1_prot_WP_004081602.1_1380;	ADA67492.1;	ACM23374.1;	ABQ47404.1;	NZ_AP014510.1_prot_WP_041083164.1_1489;	NC_010483.1_prot_WP_012311128.1_1428;	AEH50725.1;
ORTHOMCL571(20 genes,20 taxa):	NZ_LN824141.1_prot_WP_045087392.1_498;	ABS60728.1;	AFG35579.1;	ACR78902.1;	AEX84518.1;	AFK06195.1;	ABX31786.1;	IX53_02665;	ACJ74649.1;	ABR31680.1;	NC_022792.1_prot_WP_038051754.1_1666;	NC_022795.1_prot_WP_031504975.1_206;	ABV34216.1;	NC_021214.1_prot_WP_004081589.1_1374;	ADA67498.1;	ACM23380.1;	ABQ47409.1;	NZ_AP014510.1_prot_WP_041083684.1_1905;	NC_010483.1_prot_WP_012311132.1_1434;	AEH50434.1;
ORTHOMCL572(20 genes,20 taxa):	NZ_LN824141.1_prot_WP_045087393.1_499;	ABS60726.1;	AFG35577.1;	ACR78904.1;	AEX84517.1;	AFK06193.1;	ABX31785.1;	IX53_02675;	ACJ74647.1;	ABR31678.1;	NC_022792.1_prot_WP_012003690.1_1664;	NC_022795.1_prot_WP_031504977.1_208;	ABV34214.1;	NC_021214.1_prot_WP_004081585.1_1372;	ADA67500.1;	ACM23382.1;	ABQ47411.1;	NZ_AP014510.1_prot_WP_041083688.1_1907;	NC_010483.1_prot_WP_012311134.1_1436;	AEH50432.1;
ORTHOMCL573(20 genes,20 taxa):	NZ_LN824141.1_prot_WP_045087394.1_500;	ABS60725.1;	AFG35576.1;	ACR78905.1;	AEX84516.1;	AFK06192.1;	ABX31784.1;	IX53_02680;	ACJ74646.1;	ABR31677.1;	NC_022792.1_prot_WP_012003689.1_1663;	NC_022795.1_prot_WP_031504978.1_209;	ABV34213.1;	NC_021214.1_prot_WP_004081583.1_1371;	ADA67501.1;	ACM23383.1;	ABQ47412.1;	NZ_AP014510.1_prot_WP_041083690.1_1908;	NC_010483.1_prot_WP_012311135.1_1437;	AEH50431.1;
ORTHOMCL574(20 genes,20 taxa):	NZ_LN824141.1_prot_WP_045087167.1_225;	ABS61498.1;	AFG36021.1;	ACR80279.1;	AEX85938.1;	AFK06122.1;	ABX30907.1;	IX53_03190;	ACJ75029.1;	ABR30190.1;	NC_022792.1_prot_WP_012003521.1_1478;	NC_022795.1_prot_WP_031503500.1_1381;	ABV34045.1;	NC_021214.1_prot_WP_004081581.1_1370;	ADA67502.1;	ACM23384.1;	ABQ47413.1;	NZ_AP014510.1_prot_WP_041084146.1_1123;	NC_010483.1_prot_WP_012311136.1_1438;	AEH50529.1;
ORTHOMCL575(20 genes,20 taxa):	NZ_LN824141.1_prot_WP_045087177.1_239;	ABS61499.1;	AFG36020.1;	ACR80280.1;	AEX85939.1;	AFK06123.1;	ABX32335.1;	IX53_03195;	ACJ75030.1;	ABR30189.1;	NC_022792.1_prot_WP_012003522.1_1479;	NC_022795.1_prot_WP_031503502.1_1380;	ABV34046.1;	NC_021214.1_prot_WP_004081580.1_1369;	ADA67503.1;	ACM23385.1;	ABQ47414.1;	NZ_AP014510.1_prot_WP_041084144.1_1122;	NC_010483.1_prot_WP_012311137.1_1439;	AEH50530.1;
ORTHOMCL576(20 genes,20 taxa):	NZ_LN824141.1_prot_WP_045087052.1_92;	ABS60029.1;	AFG34551.1;	ACR79563.1;	AEX84577.1;	AFK07536.1;	ABX30852.1;	IX53_07575;	ACJ74983.1;	ABR30131.1;	NC_022792.1_prot_WP_012002280.1_215;	NC_022795.1_prot_WP_031505191.1_281;	ABV32799.1;	NC_021214.1_prot_WP_004081578.1_1367;	ADA67505.1;	ACM23387.1;	ABQ47416.1;	NZ_AP014510.1_prot_WP_041081125.1_126;	NC_010483.1_prot_WP_012311139.1_1441;	AEH51762.1;
ORTHOMCL577(20 genes,20 taxa):	NZ_LN824141.1_prot_WP_045087051.1_91;	ABS61361.1;	AFG34214.1;	ACR79564.1;	AEX84578.1;	AFK07537.1;	ABX30851.1;	IX53_07580;	ACJ74978.1;	ABR30127.1;	NC_022792.1_prot_WP_012002281.1_216;	NC_022795.1_prot_WP_031505192.1_280;	ABV32800.1;	NC_021214.1_prot_WP_004081577.1_1366;	ADA67506.1;	ACM23388.1;	ABQ47417.1;	NZ_AP014510.1_prot_WP_041081124.1_125;	NC_010483.1_prot_WP_012311140.1_1442;	AEH51761.1;
ORTHOMCL578(20 genes,20 taxa):	NZ_LN824141.1_prot_WP_045088443.1_1747;	ABS61269.1;	AFG35844.1;	ACR78740.1;	AEX86246.1;	AFK07004.1;	ABX32320.1;	IX53_00055;	ACJ75295.1;	ABR30328.1;	NC_022792.1_prot_WP_028843440.1_367;	NC_022795.1_prot_WP_031504849.1_111;	ABV32949.1;	NC_021214.1_prot_WP_004081557.1_1348;	ADA67524.1;	ACM23406.1;	ABQ47435.1;	NZ_AP014510.1_prot_WP_041083465.1_1686;	NC_010483.1_prot_WP_041434413.1_1460;	AEH51716.1;
ORTHOMCL579(20 genes,20 taxa):	NZ_LN824141.1_prot_WP_045088444.1_1748;	ABS61270.1;	AFG35845.1;	ACR78739.1;	AEX86247.1;	AFK06266.1;	ABX32321.1;	IX53_00050;	ACJ75296.1;	ABR30327.1;	NC_022792.1_prot_WP_028843439.1_368;	NC_022795.1_prot_WP_031504851.1_112;	ABV32950.1;	NC_021214.1_prot_WP_004081556.1_1347;	ADA67525.1;	ACM23407.1;	ABQ47436.1;	NZ_AP014510.1_prot_WP_041083463.1_1685;	NC_010483.1_prot_WP_011943890.1_1461;	AEH51715.1;
ORTHOMCL580(20 genes,20 taxa):	NZ_LN824141.1_prot_WP_045088156.1_1404;	ABS61357.1;	AFG34218.1;	ACR80537.1;	AEX85080.1;	AFK06439.1;	ABX32276.1;	IX53_08980;	ACJ74974.1;	ABR30123.1;	NC_022792.1_prot_WP_012002971.1_904;	NC_022795.1_prot_WP_031503675.1_1285;	ABV33490.1;	NC_021214.1_prot_WP_004081552.1_1343;	ADA67529.1;	ACM23411.1;	ABQ47440.1;	NZ_AP014510.1_prot_WP_041082671.1_1172;	NC_010483.1_prot_WP_004081552.1_1465;	AEH50497.1;
ORTHOMCL581(20 genes,20 taxa):	NZ_LN824141.1_prot_WP_045086984.1_6;	ABS60533.1;	AFG34605.1;	ACR80400.1;	AEX85605.1;	AFK06087.1;	ABX32519.1;	IX53_04655;	ACJ74782.1;	ABR29943.1;	NC_022792.1_prot_WP_012002812.1_745;	NC_022795.1_prot_WP_031502768.1_1845;	ABV33331.1;	NC_021214.1_prot_WP_004081547.1_1338;	ADA67534.1;	ACM23416.1;	ABQ47445.1;	NZ_AP014510.1_prot_WP_041083111.1_1456;	NC_010483.1_prot_WP_012311157.1_1470;	AEH50694.1;
ORTHOMCL582(20 genes,20 taxa):	NZ_LN824141.1_prot_WP_045087706.1_862;	ABS61356.1;	AFG34219.1;	ACR80777.1;	AEX84554.1;	AFK06568.1;	ABX30782.1;	IX53_00515;	ACJ74973.1;	ABR30122.1;	NC_022792.1_prot_WP_028843323.1_725;	NC_022795.1_prot_WP_031502814.1_1826;	ABV33311.1;	NC_021214.1_prot_WP_004081546.1_1337;	ADA67535.1;	ACM23417.1;	ABQ47446.1;	NZ_AP014510.1_prot_WP_041083089.1_1437;	NC_010483.1_prot_WP_012311158.1_1471;	AEH51014.1;
ORTHOMCL583(20 genes,20 taxa):	NZ_LN824141.1_prot_WP_045087477.1_594;	ABS60258.1;	AFG34343.1;	ACR80336.1;	AEX85849.1;	AFK05933.1;	ABX31304.1;	IX53_02595;	ACJ76251.1;	ABR31457.1;	NC_022792.1_prot_WP_012003436.1_1391;	NC_022795.1_prot_WP_031504809.1_84;	ABV33960.1;	NC_021214.1_prot_WP_004081542.1_1333;	ADA67539.1;	ACM23421.1;	ABQ47450.1;	NZ_AP014510.1_prot_WP_041082845.1_1283;	NC_010483.1_prot_WP_004081542.1_1475;	AEH51964.1;
ORTHOMCL584(20 genes,20 taxa):	NZ_LN824141.1_prot_WP_045087476.1_593;	ABS60257.1;	AFG34342.1;	ACR80335.1;	AEX85848.1;	AFK05934.1;	ABX31303.1;	IX53_02590;	ACJ76250.1;	ABR31456.1;	NC_022792.1_prot_WP_012003435.1_1390;	NC_022795.1_prot_WP_031504810.1_85;	ABV33959.1;	NC_021214.1_prot_WP_004081541.1_1332;	ADA67540.1;	ACM23422.1;	ABQ47451.1;	NZ_AP014510.1_prot_WP_041082844.1_1282;	NC_010483.1_prot_WP_004081541.1_1476;	AEH51963.1;
ORTHOMCL585(20 genes,20 taxa):	NZ_LN824141.1_prot_WP_045087475.1_592;	ABS61553.1;	AFG35966.1;	ACR80334.1;	AEX86090.1;	AFK05935.1;	ABX31302.1;	IX53_02585;	ACJ74779.1;	ABR29940.1;	NC_022792.1_prot_WP_012003434.1_1389;	NC_022795.1_prot_WP_038059820.1_86;	ABV33958.1;	NC_021214.1_prot_WP_004081540.1_1331;	ADA67541.1;	ACM23423.1;	ABQ47452.1;	NZ_AP014510.1_prot_WP_041082842.1_1281;	NC_010483.1_prot_WP_004081540.1_1477;	AEH51962.1;
ORTHOMCL586(20 genes,20 taxa):	NZ_LN824141.1_prot_WP_045087202.1_271;	ABS60164.1;	AFG34595.1;	ACR80536.1;	AEX84687.1;	AFK06440.1;	ABX31721.1;	IX53_08985;	ACJ74719.1;	ABR31752.1;	NC_022792.1_prot_WP_012003096.1_1029;	NC_022795.1_prot_WP_038059652.1_1358;	ABV33615.1;	NC_021214.1_prot_WP_004079958.1_1270;	ADA67592.1;	ACM23470.1;	ABQ47501.1;	NZ_AP014510.1_prot_WP_041082431.1_1026;	NC_010483.1_prot_WP_012311177.1_1530;	AEH51300.1;
ORTHOMCL587(20 genes,20 taxa):	NZ_LN824141.1_prot_WP_045088113.1_1352;	ABS60030.1;	AFG34552.1;	ACR79012.1;	AEX85241.1;	AFK06541.1;	ABX32459.1;	IX53_09840;	ACJ75987.1;	ABR31016.1;	NC_022792.1_prot_WP_028843953.1_1278;	NC_022795.1_prot_WP_031503576.1_1341;	ABV33838.1;	NC_021214.1_prot_WP_004079960.1_1268;	ADA67594.1;	ACM23472.1;	ABQ47503.1;	NZ_AP014510.1_prot_WP_041082404.1_1009;	NC_010483.1_prot_WP_011943930.1_1532;	AEH51066.1;
ORTHOMCL588(20 genes,20 taxa):	NZ_LN824141.1_prot_WP_045088112.1_1351;	ABS60031.1;	AFG34553.1;	ACR79013.1;	AEX85242.1;	AFK06542.1;	ABX32460.1;	IX53_09845;	ACJ75988.1;	ABR31017.1;	NC_022792.1_prot_WP_038051591.1_1279;	NC_022795.1_prot_WP_031503578.1_1340;	ABV33839.1;	NC_021214.1_prot_WP_004079961.1_1267;	ADA67595.1;	ACM23473.1;	ABQ47504.1;	NZ_AP014510.1_prot_WP_041082402.1_1008;	NC_010483.1_prot_WP_011943931.1_1533;	AEH51065.1;
ORTHOMCL589(20 genes,20 taxa):	NZ_LN824141.1_prot_WP_045087193.1_260;	ABS61073.1;	AFG35941.1;	ACR79050.1;	AEX85671.1;	AFK06559.1;	ABX30953.1;	IX53_09880;	ACJ75627.1;	ABR30807.1;	NC_022792.1_prot_WP_028843287.1_824;	NC_022795.1_prot_WP_031502825.1_1819;	ABV33409.1;	NC_021214.1_prot_WP_004079967.1_1265;	ADA67597.1;	ACM23475.1;	ABQ47506.1;	NZ_AP014510.1_prot_WP_041083079.1_1430;	NC_010483.1_prot_WP_012311179.1_1535;	AEH51021.1;
ORTHOMCL590(20 genes,20 taxa):	NZ_LN824141.1_prot_WP_045087192.1_259;	ABS61074.1;	AFG35940.1;	ACR79051.1;	AEX85672.1;	AFK06560.1;	ABX30954.1;	IX53_09875;	ACJ75626.1;	ABR30808.1;	NC_022792.1_prot_WP_038051289.1_825;	NC_022795.1_prot_WP_031502826.1_1818;	ABV33410.1;	NC_021214.1_prot_WP_004079969.1_1264;	ADA67598.1;	ACM23476.1;	ABQ47507.1;	NZ_AP014510.1_prot_WP_041084238.1_1429;	NC_010483.1_prot_WP_012311180.1_1536;	AEH51022.1;
ORTHOMCL593(20 genes,20 taxa):	NZ_LN824141.1_prot_WP_045087062.1_105;	ABS60914.1;	AFG35433.1;	ACR80782.1;	AEX86295.1;	AFK06798.1;	ABX30866.1;	IX53_00490;	ACJ74853.1;	ABR30001.1;	NC_022792.1_prot_WP_028843487.1_282;	NC_022795.1_prot_WP_038059765.1_526;	ABV32866.1;	NC_021214.1_prot_WP_004080006.1_1248;	ADA67614.1;	ACM23494.1;	ABQ47523.1;	NZ_AP014510.1_prot_WP_041083400.1_1643;	NC_010483.1_prot_WP_012311194.1_1553;	AEH51342.1;
ORTHOMCL594(20 genes,20 taxa):	NZ_LN824141.1_prot_WP_045087989.1_1204;	ABS60823.1;	AFG35188.1;	ACR80608.1;	AEX84495.1;	AFK06370.1;	ABX32506.1;	IX53_08615;	ACJ75226.1;	ABR30245.1;	NC_022792.1_prot_WP_028843486.1_283;	NC_022795.1_prot_WP_031504483.1_527;	ABV32867.1;	NC_021214.1_prot_WP_004080007.1_1247;	ADA67615.1;	ACM23495.1;	ABQ47524.1;	NZ_AP014510.1_prot_WP_041083398.1_1642;	NC_010483.1_prot_WP_011943945.1_1554;	AEH51341.1;
ORTHOMCL595(20 genes,20 taxa):	NZ_LN824141.1_prot_WP_045087396.1_502;	ABS60881.1;	AFG35343.1;	ACR78954.1;	AEX84913.1;	AFK06765.1;	ABX31782.1;	IX53_01985;	ACJ75774.1;	ABR30908.1;	NC_022792.1_prot_WP_012003014.1_946;	NC_022795.1_prot_WP_031503708.1_1263;	ABV33533.1;	NC_021214.1_prot_WP_004080033.1_1233;	ADA67629.1;	ACM23509.1;	ABQ47538.1;	NZ_AP014510.1_prot_WP_041082494.1_1061;	NC_010483.1_prot_WP_012311200.1_1568;	AEH51916.1;
ORTHOMCL596(20 genes,20 taxa):	NZ_LN824141.1_prot_WP_045088508.1_145;	ABS60576.1;	AFG35060.1;	ACR78859.1;	AEX86062.1;	AFK06713.1;	ABX31520.1;	IX53_02370;	ACJ75457.1;	ABR30641.1;	NC_022792.1_prot_WP_028843243.1_915;	NC_022795.1_prot_WP_031503657.1_1295;	ABV33501.1;	NC_021214.1_prot_WP_004080037.1_1231;	ADA67631.1;	ACM23511.1;	ABQ47540.1;	NZ_AP014510.1_prot_WP_041082653.1_1162;	NC_010483.1_prot_WP_011943957.1_1570;	AEH50646.1;
ORTHOMCL598(20 genes,20 taxa):	NZ_LN824141.1_prot_WP_045087845.1_1022;	ABS60280.1;	AFG34960.1;	ACR79659.1;	AEX86427.1;	AFK07203.1;	ABX31554.1;	IX53_07270;	ACJ76019.1;	ABR30293.1;	NC_022792.1_prot_WP_012003150.1_1096;	NC_022795.1_prot_WP_031505142.1_886;	ABV33669.1;	NC_021214.1_prot_WP_004080140.1_1184;	ADA67656.1;	ACM23561.1;	ABQ47569.1;	NZ_AP014510.1_prot_WP_041082360.1_978;	NC_010483.1_prot_WP_011943983.1_1617;	AEH51421.1;
ORTHOMCL599(20 genes,20 taxa):	NZ_LN824141.1_prot_WP_045087674.1_824;	ABS61324.1;	AFG34248.1;	ACR79124.1;	AEX85000.1;	AFK07186.1;	ABX31841.1;	IX53_04730;	ACJ75803.1;	ABR30391.1;	NC_022792.1_prot_WP_028843475.1_299;	NC_022795.1_prot_WP_031504357.1_596;	ABV32881.1;	NC_021214.1_prot_WP_004080162.1_1179;	ADA67661.1;	ACM23567.1;	ABQ47574.1;	NZ_AP014510.1_prot_WP_041081393.1_322;	NC_010483.1_prot_WP_004080162.1_1623;	AEH50512.1;
ORTHOMCL600(20 genes,20 taxa):	NZ_LN824141.1_prot_WP_045088014.1_1236;	ABS61067.1;	AFG35947.1;	ACR78915.1;	AEX85568.1;	AFK06183.1;	ABX32054.1;	IX53_02730;	ACJ75599.1;	ABR30750.1;	NC_022792.1_prot_WP_012004021.1_1994;	NC_022795.1_prot_WP_031502242.1_1048;	ABV34545.1;	NC_021214.1_prot_WP_004080167.1_1176;	ADA67664.1;	ACM23570.1;	ABQ47577.1;	NZ_AP014510.1_prot_WP_041081187.1_186;	NC_010483.1_prot_WP_012311232.1_1626;	AEH52009.1;
ORTHOMCL601(20 genes,20 taxa):	NZ_LN824141.1_prot_WP_045087195.1_262;	ABS61071.1;	AFG35943.1;	ACR79048.1;	AEX85969.1;	AFK06557.1;	ABX30951.1;	IX53_09890;	ACJ75628.1;	ABR30805.1;	NC_022792.1_prot_WP_028843289.1_822;	NC_022795.1_prot_WP_031502821.1_1821;	ABV33407.1;	NC_021214.1_prot_WP_004080203.1_1160;	ADA67675.1;	ACM23585.1;	ABQ47589.1;	NZ_AP014510.1_prot_WP_041084239.1_1432;	NC_010483.1_prot_WP_012311242.1_1638;	AEH51019.1;
ORTHOMCL602(20 genes,20 taxa):	NZ_LN824141.1_prot_WP_045087360.1_460;	ABS60896.1;	AFG35309.1;	ACR79367.1;	AEX86080.1;	AFK07232.1;	ABX30992.1;	IX53_08095;	ACJ75932.1;	ABR31192.1;	NC_022792.1_prot_WP_028843922.1_1347;	NC_022795.1_prot_WP_031504267.1_643;	ABV33915.1;	NC_021214.1_prot_WP_004080216.1_1153;	ADA67682.1;	ACM23592.1;	ABQ47596.1;	NZ_AP014510.1_prot_WP_041081881.1_668;	NC_010483.1_prot_WP_012311246.1_1645;	AEH50613.1;
ORTHOMCL604(20 genes,20 taxa):	NZ_LN824141.1_prot_WP_045088709.1_1494;	ABS59974.1;	AFG34486.1;	ACR80841.1;	AEX84608.1;	AFK07063.1;	ABX32174.1;	IX53_10335;	ACJ74840.1;	ABR29985.1;	NC_022792.1_prot_WP_028843723.1_1769;	NC_022795.1_prot_WP_031503926.1_1142;	ABV34318.1;	NC_021214.1_prot_WP_004080280.1_1122;	ADA67707.1;	ACM23616.1;	ABQ47621.1;	NZ_AP014510.1_prot_WP_041082290.1_924;	NC_010483.1_prot_WP_012311266.1_1670;	AEH51880.1;
ORTHOMCL605(20 genes,20 taxa):	NZ_LN824141.1_prot_WP_045088095.1_1332;	ABS60929.1;	AFG35436.1;	ACR79601.1;	AEX85227.1;	AFK07020.1;	ABX32634.1;	IX53_05200;	ACJ76242.1;	ABR31448.1;	NC_022792.1_prot_WP_012002112.1_59;	NC_022795.1_prot_WP_031502466.1_2016;	ABV32631.1;	NC_021214.1_prot_WP_004080335.1_1094;	ADA67734.1;	ACM23641.1;	ABQ47647.1;	NZ_AP014510.1_prot_WP_041082163.1_842;	NC_010483.1_prot_WP_012311293.1_1702;	AEH50852.1;
ORTHOMCL606(20 genes,20 taxa):	NZ_LN824141.1_prot_WP_045087751.1_912;	ABS60559.1;	AFG35077.1;	ACR80125.1;	AEX85115.1;	AFK05990.1;	ABX30817.1;	IX53_04170;	ACJ75558.1;	ABR31649.1;	NC_022792.1_prot_WP_012003759.1_1733;	NC_022795.1_prot_WP_031503870.1_1172;	ABV34283.1;	NC_021214.1_prot_WP_004080343.1_1089;	ADA67738.1;	ACM23646.1;	ABQ47651.1;	NZ_AP014510.1_prot_WP_041082949.1_1346;	NC_010483.1_prot_WP_012311297.1_1707;	AEH51906.1;
ORTHOMCL607(20 genes,20 taxa):	NZ_LN824141.1_prot_WP_045087991.1_1206;	ABS60270.1;	AFG34355.1;	ACR80126.1;	AEX84904.1;	AFK05991.1;	ABX32348.1;	IX53_04165;	ACJ76217.1;	ABR31340.1;	NC_022792.1_prot_WP_028843742.1_1738;	NC_022795.1_prot_WP_031503878.1_1168;	ABV34288.1;	NC_021214.1_prot_WP_004080362.1_1085;	ADA67742.1;	ACM23651.1;	ABQ47655.1;	NZ_AP014510.1_prot_WP_041082958.1_1351;	NC_010483.1_prot_WP_012311301.1_1711;	AEH51901.1;
ORTHOMCL608(20 genes,20 taxa):	NZ_LN824141.1_prot_WP_045087067.1_111;	ABS61296.1;	AFG35915.1;	ACR79101.1;	AEX85092.1;	AFK07141.1;	ABX32493.1;	IX53_07130;	ACJ75569.1;	ABR30607.1;	NC_022792.1_prot_WP_012002808.1_741;	NC_022795.1_prot_WP_031502774.1_1842;	ABV33327.1;	NC_021214.1_prot_WP_004080372.1_1082;	ADA67745.1;	ACM23654.1;	ABQ47658.1;	NZ_AP014510.1_prot_WP_041083108.1_1453;	NC_010483.1_prot_WP_012311303.1_1714;	AEH50998.1;
ORTHOMCL609(20 genes,20 taxa):	NZ_LN824141.1_prot_WP_045088680.1_1307;	ABS61522.1;	AFG36001.1;	ACR79100.1;	AEX85093.1;	AFK07140.1;	ABX32608.1;	IX53_07135;	ACJ76039.1;	ABR31109.1;	NC_022792.1_prot_WP_012002939.1_873;	NC_022795.1_prot_WP_031505276.1_1513;	ABV33458.1;	NC_021214.1_prot_WP_004080375.1_1081;	ADA67746.1;	ACM23655.1;	ABQ47659.1;	NZ_AP014510.1_prot_WP_041083855.1_2018;	NC_010483.1_prot_WP_012311304.1_1715;	AEH50505.1;
ORTHOMCL610(20 genes,20 taxa):	NZ_LN824141.1_prot_WP_045088072.1_1306;	ABS61521.1;	AFG36002.1;	ACR79099.1;	AEX85094.1;	AFK07139.1;	ABX32607.1;	IX53_07140;	ACJ76040.1;	ABR31110.1;	NC_022792.1_prot_WP_012002940.1_874;	NC_022795.1_prot_WP_031505275.1_1514;	ABV33459.1;	NC_021214.1_prot_WP_004080380.1_1080;	ADA67747.1;	ACM23656.1;	ABQ47660.1;	NZ_AP014510.1_prot_WP_041083853.1_2017;	NC_010483.1_prot_WP_012311305.1_1716;	AEH50506.1;
ORTHOMCL611(20 genes,20 taxa):	NZ_LN824141.1_prot_WP_045088071.1_1305;	ABS61520.1;	AFG36003.1;	ACR79098.1;	AEX85095.1;	AFK07138.1;	ABX32606.1;	IX53_07145;	ACJ76041.1;	ABR31111.1;	NC_022792.1_prot_WP_012002941.1_875;	NC_022795.1_prot_WP_031505274.1_1515;	ABV33460.1;	NC_021214.1_prot_WP_004080386.1_1079;	ADA67748.1;	ACM23657.1;	ABQ47661.1;	NZ_AP014510.1_prot_WP_041083851.1_2016;	NC_010483.1_prot_WP_004080386.1_1717;	AEH50507.1;
ORTHOMCL612(20 genes,20 taxa):	NZ_LN824141.1_prot_WP_045088473.1_1781;	ABS60649.1;	AFG35109.1;	ACR78746.1;	AEX86319.1;	AFK06261.1;	ABX31955.1;	IX53_00085;	ACJ76011.1;	ABR31041.1;	NC_022792.1_prot_WP_028843454.1_335;	NC_022795.1_prot_WP_031503839.1_1191;	ABV32916.1;	NC_021214.1_prot_WP_004080396.1_1076;	ADA67751.1;	ACM23660.1;	ABQ47664.1;	NZ_AP014510.1_prot_WP_041084028.1_437;	NC_010483.1_prot_WP_012311308.1_1720;	AEH50289.1;
ORTHOMCL613(20 genes,20 taxa):	NZ_LN824141.1_prot_WP_045088472.1_1780;	ABS60648.1;	AFG35108.1;	ACR78747.1;	AEX86320.1;	AFK06260.1;	ABX31954.1;	IX53_00090;	ACJ76010.1;	ABR31040.1;	NC_022792.1_prot_WP_028843455.1_334;	NC_022795.1_prot_WP_031503840.1_1190;	ABV32915.1;	NC_021214.1_prot_WP_004080399.1_1075;	ADA67752.1;	ACM23661.1;	ABQ47665.1;	NZ_AP014510.1_prot_WP_041081554.1_438;	NC_010483.1_prot_WP_012311309.1_1721;	AEH50288.1;
ORTHOMCL614(20 genes,20 taxa):	NZ_LN824141.1_prot_WP_045088470.1_1778;	ABS60643.1;	AFG35103.1;	ACR78749.1;	AEX86323.1;	AFK06258.1;	ABX31952.1;	IX53_00100;	ACJ76006.1;	ABR31036.1;	NC_022792.1_prot_WP_012002392.1_330;	NC_022795.1_prot_WP_031503847.1_1186;	ABV32911.1;	NC_021214.1_prot_WP_004080405.1_1071;	ADA67755.1;	ACM23665.1;	ABQ47669.1;	NZ_AP014510.1_prot_WP_041081559.1_442;	NC_010483.1_prot_WP_004080405.1_1725;	AEH50284.1;
ORTHOMCL615(20 genes,20 taxa):	NZ_LN824141.1_prot_WP_045088654.1_1164;	ABS61492.1;	AFG36027.1;	ACR79052.1;	AEX86373.1;	AFK07019.1;	ABX32541.1;	IX53_09870;	ACJ74911.1;	ABR30064.1;	NC_022792.1_prot_WP_038051303.1_735;	NC_022795.1_prot_WP_031502784.1_1836;	ABV33321.1;	NC_021214.1_prot_WP_004080406.1_1070;	ADA67756.1;	ACM23666.1;	ABQ47670.1;	NZ_AP014510.1_prot_WP_041084245.1_1447;	NC_010483.1_prot_WP_012311313.1_1726;	AEH51004.1;
ORTHOMCL616(20 genes,20 taxa):	NZ_LN824141.1_prot_WP_045088655.1_1165;	ABS61491.1;	AFG36028.1;	ACR79053.1;	AEX86372.1;	AFK07018.1;	ABX32542.1;	IX53_09865;	ACJ74910.1;	ABR30063.1;	NC_022792.1_prot_WP_012002803.1_736;	NC_022795.1_prot_WP_038059611.1_1837;	ABV33322.1;	NC_021214.1_prot_WP_004080407.1_1069;	ADA67757.1;	ACM23667.1;	ABQ47671.1;	NZ_AP014510.1_prot_WP_041084247.1_1448;	NC_010483.1_prot_WP_012311314.1_1727;	AEH51003.1;
ORTHOMCL618(20 genes,20 taxa):	NZ_LN824141.1_prot_WP_045087492.1_612;	ABS60768.1;	AFG35402.1;	ACR80632.1;	AEX84705.1;	AFK07518.1;	ABX31327.1;	IX53_09445;	ACJ75293.1;	ABR30329.1;	NC_022792.1_prot_WP_012003502.1_1458;	NC_022795.1_prot_WP_031505098.1_931;	ABV34026.1;	NC_021214.1_prot_WP_004080450.1_1046;	ADA67777.1;	ACM23688.1;	ABQ47701.1;	NZ_AP014510.1_prot_WP_041081903.1_680;	NC_010483.1_prot_WP_004080450.1_1739;	AEH50192.1;
ORTHOMCL619(20 genes,20 taxa):	NZ_LN824141.1_prot_WP_045087493.1_613;	ABS59957.1;	AFG34469.1;	ACR80633.1;	AEX84704.1;	AFK07517.1;	ABX31328.1;	IX53_09440;	ACJ75428.1;	ABR30701.1;	NC_022792.1_prot_WP_012003503.1_1459;	NC_022795.1_prot_WP_031505099.1_930;	ABV34027.1;	NC_021214.1_prot_WP_004080452.1_1045;	ADA67778.1;	ACM23689.1;	ABQ47702.1;	NZ_AP014510.1_prot_WP_041081901.1_679;	NC_010483.1_prot_WP_004080452.1_1740;	AEH50191.1;
ORTHOMCL620(20 genes,20 taxa):	NZ_LN824141.1_prot_WP_045087494.1_614;	ABS59956.1;	AFG34468.1;	ACR80634.1;	AEX84703.1;	AFK07516.1;	ABX31329.1;	IX53_09435;	ACJ75429.1;	ABR30700.1;	NC_022792.1_prot_WP_012003504.1_1460;	NC_022795.1_prot_WP_031505100.1_929;	ABV34028.1;	NC_021214.1_prot_WP_004080454.1_1044;	ADA67779.1;	ACM23690.1;	ABQ47703.1;	NZ_AP014510.1_prot_WP_041081899.1_678;	NC_010483.1_prot_WP_004080454.1_1741;	AEH50190.1;
ORTHOMCL621(20 genes,20 taxa):	NZ_LN824141.1_prot_WP_045088467.1_1775;	ABS61539.1;	AFG35983.1;	ACR78764.1;	AEX86327.1;	AFK06243.1;	ABX31949.1;	IX53_00175;	ACJ74549.1;	ABR31580.1;	NC_022792.1_prot_WP_012003505.1_1461;	NC_022795.1_prot_WP_031505101.1_928;	ABV34029.1;	NC_021214.1_prot_WP_004080456.1_1043;	ADA67780.1;	ACM23691.1;	ABQ47704.1;	NZ_AP014510.1_prot_WP_041081897.1_677;	NC_010483.1_prot_WP_012311322.1_1742;	AEH50189.1;
ORTHOMCL622(20 genes,20 taxa):	NZ_LN824141.1_prot_WP_045087673.1_823;	ABS61537.1;	AFG35985.1;	ACR78767.1;	AEX86233.1;	AFK06239.1;	ABX31840.1;	IX53_00190;	ACJ74933.1;	ABR30082.1;	NC_022792.1_prot_WP_012003507.1_1463;	NC_022795.1_prot_WP_031505103.1_926;	ABV34031.1;	NC_021214.1_prot_WP_004080460.1_1041;	ADA67782.1;	ACM23693.1;	ABQ47706.1;	NZ_AP014510.1_prot_WP_041081893.1_675;	NC_010483.1_prot_WP_012311324.1_1744;	AEH50187.1;
ORTHOMCL623(20 genes,20 taxa):	NZ_LN824141.1_prot_WP_045087672.1_822;	ABS60925.1;	AFG35421.1;	ACR78768.1;	AEX86234.1;	AFK06238.1;	ABX31839.1;	IX53_00195;	ACJ74829.1;	ABR29974.1;	NC_022792.1_prot_WP_012003508.1_1464;	NC_022795.1_prot_WP_031505104.1_925;	ABV34032.1;	NC_021214.1_prot_WP_004080462.1_1040;	ADA67783.1;	ACM23694.1;	ABQ47707.1;	NZ_AP014510.1_prot_WP_041081891.1_674;	NC_010483.1_prot_WP_012311325.1_1745;	AEH50186.1;
ORTHOMCL624(20 genes,20 taxa):	NZ_LN824141.1_prot_WP_045087671.1_821;	ABS60924.1;	AFG35422.1;	ACR78769.1;	AEX86235.1;	AFK06237.1;	ABX31838.1;	IX53_00200;	ACJ74828.1;	ABR29973.1;	NC_022792.1_prot_WP_012003509.1_1465;	NC_022795.1_prot_WP_031505105.1_924;	ABV34033.1;	NC_021214.1_prot_WP_004080464.1_1039;	ADA67784.1;	ACM23695.1;	ABQ47708.1;	NZ_AP014510.1_prot_WP_041081889.1_673;	NC_010483.1_prot_WP_012311326.1_1746;	AEH50185.1;
ORTHOMCL625(20 genes,20 taxa):	NZ_LN824141.1_prot_WP_045087670.1_820;	ABS60923.1;	AFG35423.1;	ACR78770.1;	AEX86236.1;	AFK06236.1;	ABX31837.1;	IX53_00205;	ACJ75867.1;	ABR30977.1;	NC_022792.1_prot_WP_028843878.1_1466;	NC_022795.1_prot_WP_038059859.1_922;	ABV34034.1;	NC_021214.1_prot_WP_008193407.1_1038;	ADA67785.1;	ACM23696.1;	ABQ47709.1;	NZ_AP014510.1_prot_WP_041084070.1_672;	NC_010483.1_prot_WP_012311327.1_1747;	AEH50184.1;
ORTHOMCL626(20 genes,20 taxa):	NZ_LN824141.1_prot_WP_045088323.1_1609;	ABS60707.1;	AFG35277.1;	ACR79657.1;	AEX86167.1;	AFK07202.1;	ABX32130.1;	IX53_07340;	ACJ75829.1;	ABR30419.1;	NC_022792.1_prot_WP_012003041.1_973;	NC_022795.1_prot_WP_031503628.1_1312;	ABV33560.1;	NC_021214.1_prot_WP_004080491.1_1022;	ADA67800.1;	ACM23711.1;	ABQ47724.1;	NZ_AP014510.1_prot_WP_041082918.1_1329;	NC_010483.1_prot_WP_004080491.1_1763;	AEH50667.1;
ORTHOMCL628(20 genes,20 taxa):	NZ_LN824141.1_prot_WP_045088121.1_1360;	ABS60930.1;	AFG35437.1;	ACR80639.1;	AEX85462.1;	AFK06484.1;	ABX32452.1;	IX53_09410;	ACJ74897.1;	ABR30046.1;	NC_022792.1_prot_WP_012003524.1_1481;	NC_022795.1_prot_WP_031503507.1_1378;	ABV34048.1;	NC_021214.1_prot_WP_004080595.1_959;	ADA67841.1;	ACM23785.1;	ABQ47780.1;	NZ_AP014510.1_prot_WP_041082578.1_1120;	NC_010483.1_prot_WP_012311363.1_1809;	AEH50532.1;
ORTHOMCL629(20 genes,20 taxa):	NZ_LN824141.1_prot_WP_045087310.1_398;	ABS60676.1;	AFG35144.1;	ACR80170.1;	AEX85563.1;	AFK06032.1;	ABX31053.1;	IX53_03925;	ACJ75652.1;	ABR30782.1;	NC_022792.1_prot_WP_028843349.1_644;	NC_022795.1_prot_WP_031504103.1_733;	ABV33229.1;	NC_021214.1_prot_WP_004080620.1_933;	ADA67862.1;	ACM23810.1;	ABQ47800.1;	NZ_AP014510.1_prot_WP_041081790.1_608;	NC_010483.1_prot_WP_012311378.1_1824;	AEH51153.1;
ORTHOMCL630(20 genes,20 taxa):	NZ_LN824141.1_prot_WP_045088548.1_399;	ABS60677.1;	AFG35145.1;	ACR80168.1;	AEX85562.1;	AFK06030.1;	ABX31052.1;	IX53_03935;	ACJ75654.1;	ABR30780.1;	NC_022792.1_prot_WP_028843347.1_646;	NC_022795.1_prot_WP_031504106.1_731;	ABV33231.1;	NC_021214.1_prot_WP_004080622.1_931;	ADA67864.1;	ACM23812.1;	ABQ47802.1;	NZ_AP014510.1_prot_WP_041081794.1_610;	NC_010483.1_prot_WP_012311380.1_1826;	AEH51151.1;
