# Supplementary material for: Complete genome sequence and whole-genome phylogeny of Kosmotoga pacifica type strain SLHLJ1T from an East Pacific hydrothermal sediment
Source: Springer Nature journal article supplement (doi:10.1186/s40793-016-0214-2), 2017-01-05

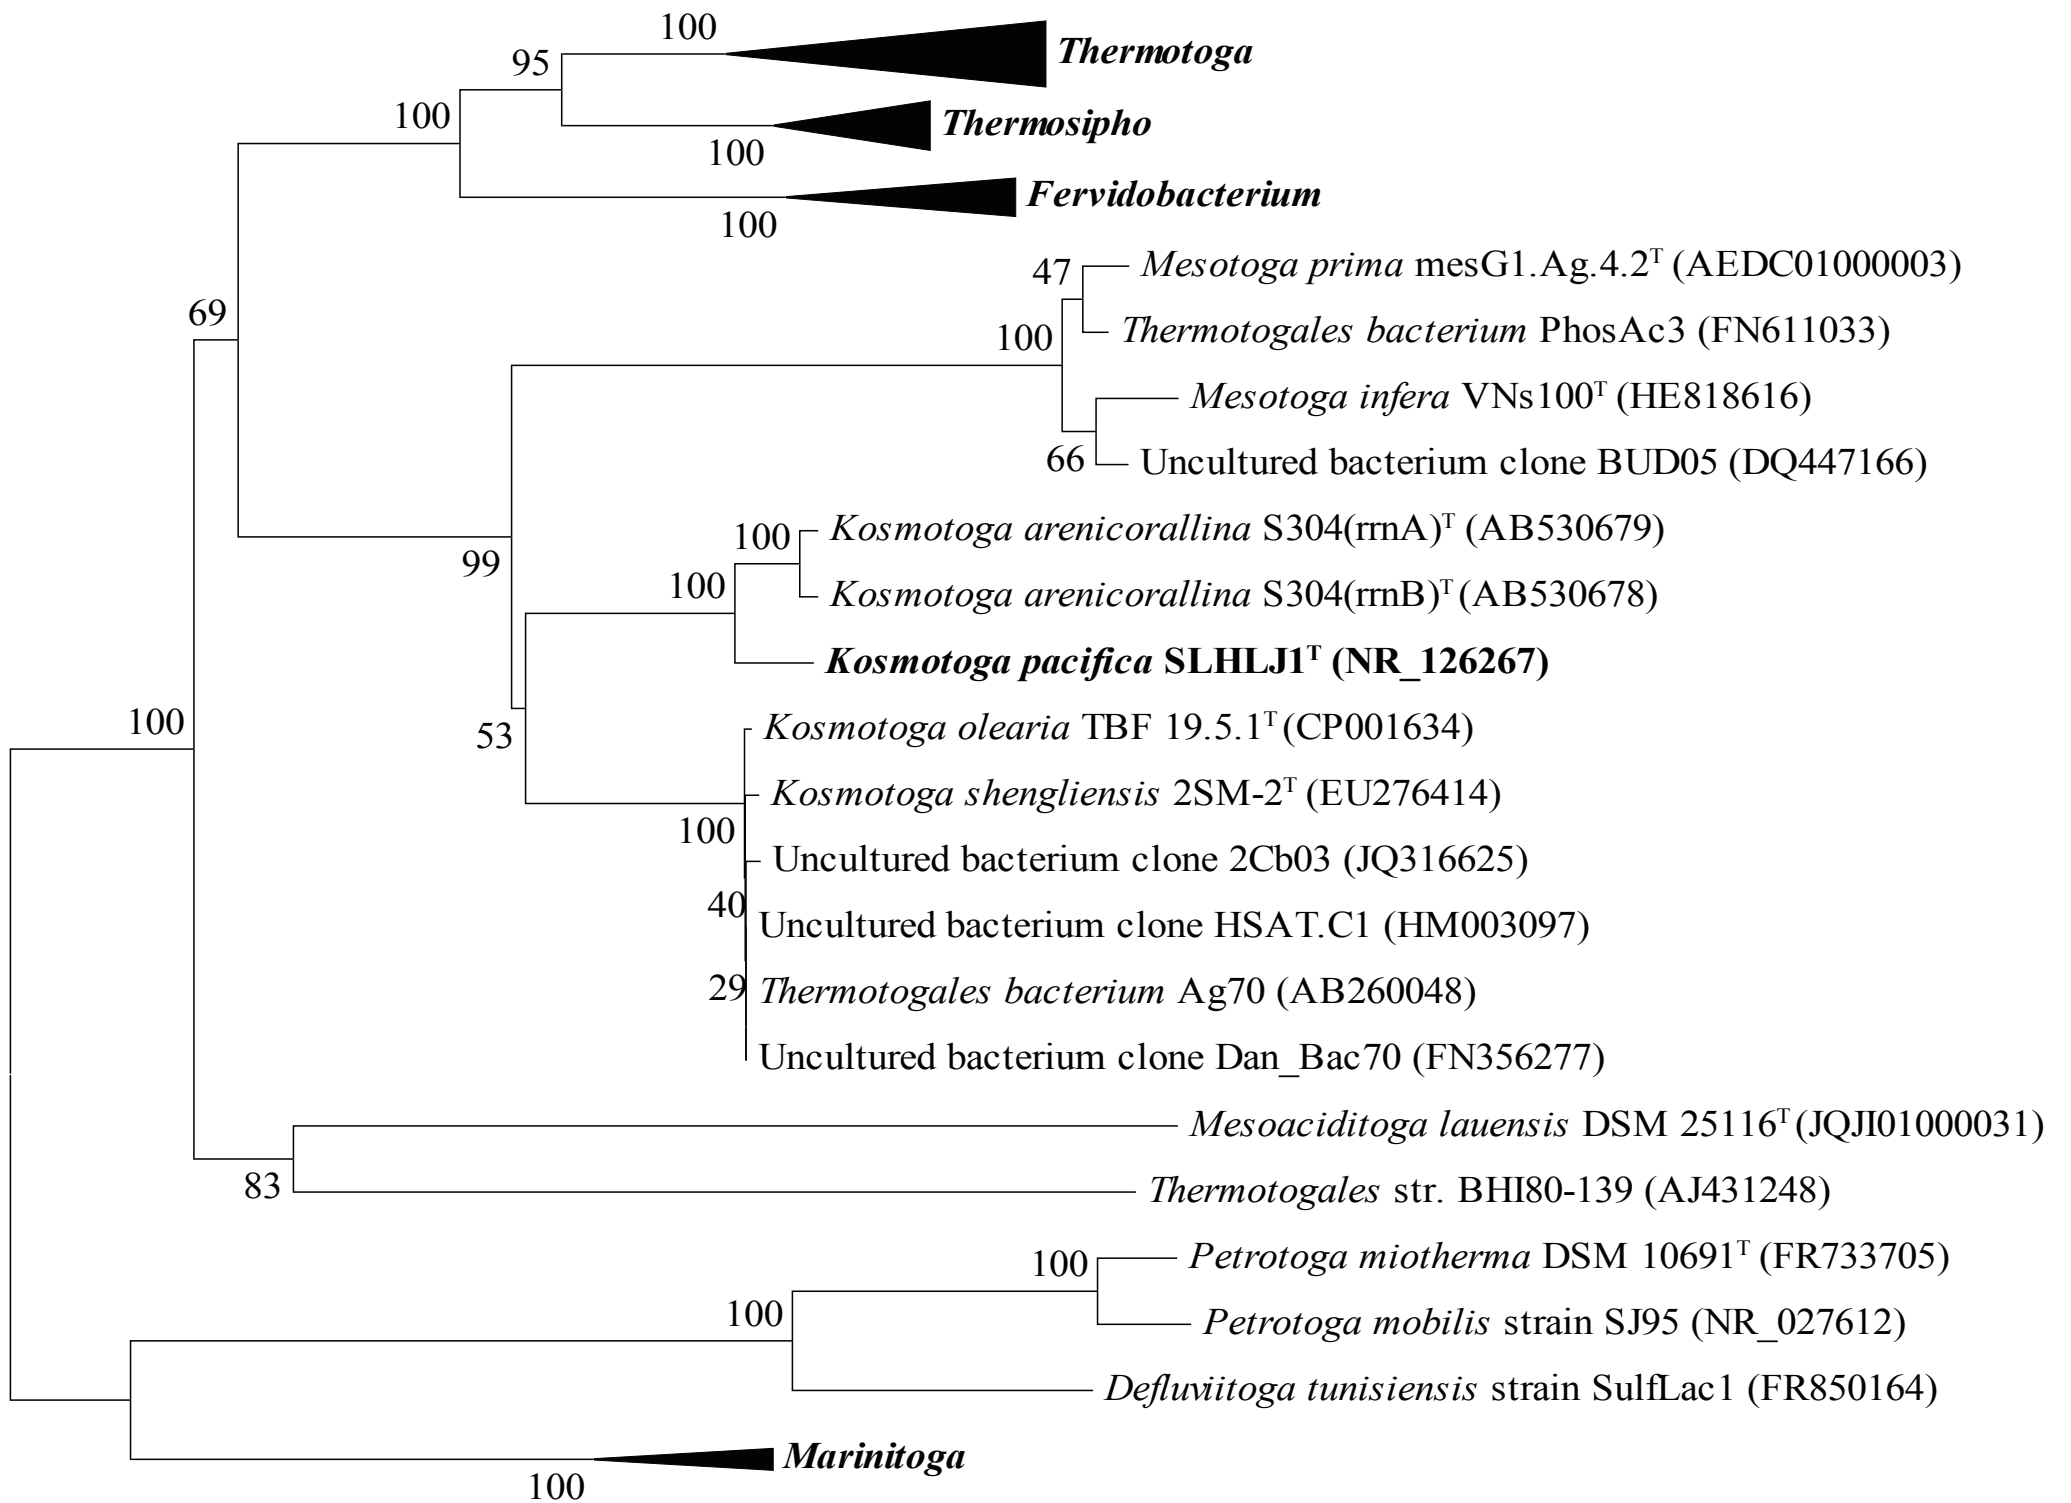

Supplement: MOESM2 [file 40793_2016_214_MOESM2_ESM.pdf]
